# Supplementary material for: METTL3-mediated m6A modification of has_circ_0007905 promotes age-related cataract progression through miR-6749-3p/EIF4EBP1
Source: PeerJ journal article supplement (doi:10.7717/peerj.14863), 2023-03-06
Supplement: Raw_data.zip [file 2 gene.xls]

## Sheet: Actin
Block Type	384-Well Block
Chemistry	SYBR_GREEN
Experiment Name	2022-09-30 141450 wangli
Experiment Run End Time	2022-10-01 00:37:14 AM CST
Experiment Type	Comparative Cт (ΔΔCт)
Instrument Type	QuantStudio(TM) 6 Flex System
Passive Reference	ROX
Quantification Cycle Method	Ct
Signal Smoothing On	true
Stage/ Cycle where Analysis is performed	Stage 2, Step 2
User Name
Well	Well Position	Sample Name	Target Name	Task	Reporter	Quencher	CT	Ct Mean	Ct SD	Tm1	Ct Threshold
13	A13	duizhaozu 1	Actin	UNKNOWN	SYBR	None	19.4098	19.3347	0.0748278	88.5533	0.1
14	A14	duizhaozu 1	Actin	UNKNOWN	SYBR	None	19.2602	19.3347	0.0748278	88.5533	0.1
15	A15	duizhaozu 1	Actin	UNKNOWN	SYBR	None	19.3342	19.3347	0.0748278	88.5533	0.1
37	B13	duizhaozu 2	Actin	UNKNOWN	SYBR	None	20.2142	20.0514	0.148373	88.5533	0.1
38	B14	duizhaozu 2	Actin	UNKNOWN	SYBR	None	20.016	20.0514	0.148373	88.5533	0.1
39	B15	duizhaozu 2	Actin	UNKNOWN	SYBR	None	19.9239	20.0514	0.148373	88.5533	0.1
61	C13	3 N4C3	Actin	UNKNOWN	SYBR	None	20.8335	20.8456	0.0664789	88.5533	0.1
62	C14	3 N4C3	Actin	UNKNOWN	SYBR	None	20.7861	20.8456	0.0664789	88.5533	0.1
63	C15	3 N4C3	Actin	UNKNOWN	SYBR	None	20.9173	20.8456	0.0664789	88.5533	0.1
85	D13	4 N3C3	Actin	UNKNOWN	SYBR	None	19.4336	19.4531	0.0386713	88.5533	0.1
86	D14	4 N3C3	Actin	UNKNOWN	SYBR	None	19.4976	19.4531	0.0386713	88.5533	0.1
87	D15	4 N3C3	Actin	UNKNOWN	SYBR	None	19.428	19.4531	0.0386713	88.5533	0.1
109	E13	5 N4C4	Actin	UNKNOWN	SYBR	None	20.9751	20.7963	0.155137	88.2894	0.1
110	E14	5 N4C4	Actin	UNKNOWN	SYBR	None	20.7165	20.7963	0.155137	88.5533	0.1
111	E15	5 N4C4	Actin	UNKNOWN	SYBR	None	20.6974	20.7963	0.155137	88.5533	0.1
133	F13	6 N3C3	Actin	UNKNOWN	SYBR	None	19.4939	19.2509	0.245477	88.5533	0.1
134	F14	6 N3C3	Actin	UNKNOWN	SYBR	None	19.2558	19.2509	0.245477	88.5533	0.1
135	F15	6 N3C3	Actin	UNKNOWN	SYBR	None	19.003	19.2509	0.245477	88.5533	0.1
157	G13	1N3C3	Actin	UNKNOWN	SYBR	None	19.4426	19.264	0.21663	88.6852	0.1
158	G14	1N3C3	Actin	UNKNOWN	SYBR	None	19.0231	19.264	0.21663	88.6852	0.1
159	G15	1N3C3	Actin	UNKNOWN	SYBR	None	19.3264	19.264	0.21663	88.6852	0.1
181	H13	2N2C2P2	Actin	UNKNOWN	SYBR	None	20.6539	20.6515	0.0386065	88.5533	0.1
182	H14	2N2C2P2	Actin	UNKNOWN	SYBR	None	20.6889	20.6515	0.0386065	88.6852	0.1
183	H15	2N2C2P2	Actin	UNKNOWN	SYBR	None	20.6118	20.6515	0.0386065	88.5533	0.1
205	I13	3N3C3	Actin	UNKNOWN	SYBR	None	19.4398	19.612	0.17153	88.5533	0.1
206	I14	3N3C3	Actin	UNKNOWN	SYBR	None	19.7828	19.612	0.17153	88.6852	0.1
207	I15	3N3C3	Actin	UNKNOWN	SYBR	None	19.6132	19.612	0.17153	88.5533	0.1
229	J13	4N3C3	Actin	UNKNOWN	SYBR	None	19.4433	19.4167	0.0646105	88.5533	0.1
230	J14	4N3C3	Actin	UNKNOWN	SYBR	None	19.4637	19.4167	0.0646105	88.1575	0.1
231	J15	4N3C3	Actin	UNKNOWN	SYBR	None	19.343	19.4167	0.0646105	88.5533	0.1
253	K13	5N2C3	Actin	UNKNOWN	SYBR	None	19.3946	19.3104	0.0887948	88.5533	0.1
254	K14	5N2C3	Actin	UNKNOWN	SYBR	None	19.3189	19.3104	0.0887948	88.5533	0.1
255	K15	5N2C3	Actin	UNKNOWN	SYBR	None	19.2176	19.3104	0.0887948	88.5533	0.1
277	L13	6N3C5	Actin	UNKNOWN	SYBR	None	19.187	18.8883	0.278718	88.5533	0.1
278	L14	6N3C5	Actin	UNKNOWN	SYBR	None	18.6351	18.8883	0.278718	88.0256	0.1
279	L15	6N3C5	Actin	UNKNOWN	SYBR	None	18.8428	18.8883	0.278718	88.2894	0.1
301	M13		Actin	NTC	SYBR	None	Undetermined			61.1542	0.1
Analysis Type	Singleplex
Endogenous Control	Actin
RQ Min/Max Confidence Level	95.0
Reference Sample	1N3C3

## Sheet: WTAP
Block Type	384-Well Block
Chemistry	SYBR_GREEN
Experiment Name	2022-09-30 141450 wangli
Experiment Run End Time	2022-10-01 00:37:14 AM CST
Experiment Type	Comparative Cт (ΔΔCт)
Instrument Type	QuantStudio(TM) 6 Flex System
Passive Reference	ROX
Quantification Cycle Method	Ct
Signal Smoothing On	true
Stage/ Cycle where Analysis is performed	Stage 2, Step 2
User Name
Well	Well Position	Sample Name	Target Name	Task	Reporter	Quencher	CT	Ct Mean	Ct SD	Tm1	Ct Threshold
16	A16	duizhaozu 1	WTAP	UNKNOWN	SYBR	None	21.4701	21.5047	0.0488634	74.967	0.1
17	A17	duizhaozu 1	WTAP	UNKNOWN	SYBR	None	21.5047	21.5047	0.0488634	73.878	0.1
18	A18	duizhaozu 1	WTAP	UNKNOWN	SYBR	None	21.5392	21.5047	0.0488634	74.8351	0.1
40	B16	duizhaozu 2	WTAP	UNKNOWN	SYBR	None	22.2979	22.1115	0.213686	74.8351	0.1
41	B17	duizhaozu 2	WTAP	UNKNOWN	SYBR	None	22.1584	22.1115	0.213686	74.8351	0.1
42	B18	duizhaozu 2	WTAP	UNKNOWN	SYBR	None	21.8783	22.1115	0.213686	74.8351	0.1
64	C16	3 N4C3	WTAP	UNKNOWN	SYBR	None	22.6391	22.6507	0.0585507	74.967	0.1
65	C17	3 N4C3	WTAP	UNKNOWN	SYBR	None	22.5989	22.6507	0.0585507	74.8351	0.1
66	C18	3 N4C3	WTAP	UNKNOWN	SYBR	None	22.7142	22.6507	0.0585507	74.967	0.1
88	D16	4 N3C3	WTAP	UNKNOWN	SYBR	None	22.2668	22.2502	0.018247	74.967	0.1
89	D17	4 N3C3	WTAP	UNKNOWN	SYBR	None	22.2531	22.2502	0.018247	74.967	0.1
90	D18	4 N3C3	WTAP	UNKNOWN	SYBR	None	22.2306	22.2502	0.018247	74.8351	0.1
112	E16	5 N4C4	WTAP	UNKNOWN	SYBR	None	23.3464	23.33	0.0901426	74.967	0.1
113	E17	5 N4C4	WTAP	UNKNOWN	SYBR	None	23.2328	23.33	0.0901426	74.967	0.1
114	E18	5 N4C4	WTAP	UNKNOWN	SYBR	None	23.4108	23.33	0.0901426	74.967	0.1
136	F16	6 N3C3	WTAP	UNKNOWN	SYBR	None	21.7445	21.8259	0.0795421	74.967	0.1
137	F17	6 N3C3	WTAP	UNKNOWN	SYBR	None	21.83	21.8259	0.0795421	74.967	0.1
138	F18	6 N3C3	WTAP	UNKNOWN	SYBR	None	21.9034	21.8259	0.0795421	74.967	0.1
160	G16	1N3C3	WTAP	UNKNOWN	SYBR	None	22.2267	22.2341	0.0144186	74.967	0.1
161	G17	1N3C3	WTAP	UNKNOWN	SYBR	None	22.2248	22.2341	0.0144186	74.967	0.1
162	G18	1N3C3	WTAP	UNKNOWN	SYBR	None	22.2507	22.2341	0.0144186	74.967	0.1
184	H16	2N2C2P2	WTAP	UNKNOWN	SYBR	None	22.2938	22.5928	0.26377	74.967	0.1
185	H17	2N2C2P2	WTAP	UNKNOWN	SYBR	None	22.6918	22.5928	0.26377	74.967	0.1
186	H18	2N2C2P2	WTAP	UNKNOWN	SYBR	None	22.7927	22.5928	0.26377	74.967	0.1
208	I16	3N3C3	WTAP	UNKNOWN	SYBR	None	22.3017	22.0317	0.269609	74.967	0.1
209	I17	3N3C3	WTAP	UNKNOWN	SYBR	None	21.7625	22.0317	0.269609	74.967	0.1
210	I18	3N3C3	WTAP	UNKNOWN	SYBR	None	22.0308	22.0317	0.269609	74.967	0.1
232	J16	4N3C3	WTAP	UNKNOWN	SYBR	None	21.8338	22.0078	0.202071	74.8351	0.1
233	J17	4N3C3	WTAP	UNKNOWN	SYBR	None	21.9601	22.0078	0.202071	74.967	0.1
234	J18	4N3C3	WTAP	UNKNOWN	SYBR	None	22.2294	22.0078	0.202071	74.967	0.1
256	K16	5N2C3	WTAP	UNKNOWN	SYBR	None	21.3622	21.3264	0.0829894	74.8351	0.1
257	K17	5N2C3	WTAP	UNKNOWN	SYBR	None	21.2316	21.3264	0.0829894	74.967	0.1
258	K18	5N2C3	WTAP	UNKNOWN	SYBR	None	21.3855	21.3264	0.0829894	74.967	0.1
280	L16	6N3C5	WTAP	UNKNOWN	SYBR	None	21.67	21.6656	0.0595077	74.1756	0.1
281	L17	6N3C5	WTAP	UNKNOWN	SYBR	None	21.604	21.6656	0.0595077	74.8351	0.1
282	L18	6N3C5	WTAP	UNKNOWN	SYBR	None	21.7227	21.6656	0.0595077	74.0437	0.1
302	M14		WTAP	NTC	SYBR	None	Undetermined			61.2309	0.1
Analysis Type	Singleplex
Endogenous Control	Actin
RQ Min/Max Confidence Level	95.0
Reference Sample	1N3C3

## Sheet: ALKBH5
Block Type	384-Well Block
Chemistry	SYBR_GREEN
Experiment Name	2022-09-30 141450 wangli
Experiment Run End Time	2022-10-01 00:37:14 AM CST
Experiment Type	Comparative Cт (ΔΔCт)
Instrument Type	QuantStudio(TM) 6 Flex System
Passive Reference	ROX
Quantification Cycle Method	Ct
Signal Smoothing On	true
Stage/ Cycle where Analysis is performed	Stage 2, Step 2
User Name
Well	Well Position	Sample Name	Target Name	Task	Reporter	Quencher	CT	Ct Mean	Ct SD	Tm1	Ct Threshold
19	A19	duizhaozu 1	ALKBH5	UNKNOWN	SYBR	None	20.2361	20.6331	0.361955	80.3752	0.1
20	A20	duizhaozu 1	ALKBH5	UNKNOWN	SYBR	None	20.7182	20.6331	0.361955	80.3752	0.1
21	A21	duizhaozu 1	ALKBH5	UNKNOWN	SYBR	None	20.9449	20.6331	0.361955	80.3752	0.1
43	B19	duizhaozu 2	ALKBH5	UNKNOWN	SYBR	None	21.3748	21.3719	0.155454	80.3752	0.1
44	B20	duizhaozu 2	ALKBH5	UNKNOWN	SYBR	None	21.5259	21.3719	0.155454	79.3199	0.1
45	B21	duizhaozu 2	ALKBH5	UNKNOWN	SYBR	None	21.2151	21.3719	0.155454	80.3752	0.1
67	C19	3 N4C3	ALKBH5	UNKNOWN	SYBR	None	22.5427	22.4536	0.0774004	80.3752	0.1
68	C20	3 N4C3	ALKBH5	UNKNOWN	SYBR	None	22.4146	22.4536	0.0774004	80.5071	0.1
69	C21	3 N4C3	ALKBH5	UNKNOWN	SYBR	None	22.4034	22.4536	0.0774004	80.3752	0.1
91	D19	4 N3C3	ALKBH5	UNKNOWN	SYBR	None	21.1256	21.2942	0.159955	80.5071	0.1
92	D20	4 N3C3	ALKBH5	UNKNOWN	SYBR	None	21.4439	21.2942	0.159955	80.3752	0.1
93	D21	4 N3C3	ALKBH5	UNKNOWN	SYBR	None	21.3132	21.2942	0.159955	80.3752	0.1
115	E19	5 N4C4	ALKBH5	UNKNOWN	SYBR	None	23.2183	23.102	0.124719	80.3752	0.1
116	E20	5 N4C4	ALKBH5	UNKNOWN	SYBR	None	22.9703	23.102	0.124719	80.1113	0.1
117	E21	5 N4C4	ALKBH5	UNKNOWN	SYBR	None	23.1175	23.102	0.124719	80.5071	0.1
139	F19	6 N3C3	ALKBH5	UNKNOWN	SYBR	None	21.3032	21.3642	0.0577587	80.5071	0.1
140	F20	6 N3C3	ALKBH5	UNKNOWN	SYBR	None	21.3712	21.3642	0.0577587	80.5071	0.1
141	F21	6 N3C3	ALKBH5	UNKNOWN	SYBR	None	21.4181	21.3642	0.0577587	80.3752	0.1
163	G19	1N3C3	ALKBH5	UNKNOWN	SYBR	None	21.5462	21.4656	0.110971	80.5071	0.1
164	G20	1N3C3	ALKBH5	UNKNOWN	SYBR	None	21.339	21.4656	0.110971	80.5071	0.1
165	G21	1N3C3	ALKBH5	UNKNOWN	SYBR	None	21.5114	21.4656	0.110971	80.5071	0.1
187	H19	2N2C2P2	ALKBH5	UNKNOWN	SYBR	None	22.1599	21.8572	0.27165	80.5071	0.1
188	H20	2N2C2P2	ALKBH5	UNKNOWN	SYBR	None	21.7772	21.8572	0.27165	80.5071	0.1
189	H21	2N2C2P2	ALKBH5	UNKNOWN	SYBR	None	21.6346	21.8572	0.27165	80.5071	0.1
211	I19	3N3C3	ALKBH5	UNKNOWN	SYBR	None	21.6349	21.4383	0.170263	80.5071	0.1
212	I20	3N3C3	ALKBH5	UNKNOWN	SYBR	None	21.3407	21.4383	0.170263	80.5071	0.1
213	I21	3N3C3	ALKBH5	UNKNOWN	SYBR	None	21.3394	21.4383	0.170263	80.5071	0.1
235	J19	4N3C3	ALKBH5	UNKNOWN	SYBR	None	21.6999	21.6135	0.131271	80.5071	0.1
236	J20	4N3C3	ALKBH5	UNKNOWN	SYBR	None	21.4624	21.6135	0.131271	80.5071	0.1
237	J21	4N3C3	ALKBH5	UNKNOWN	SYBR	None	21.6781	21.6135	0.131271	80.5071	0.1
259	K19	5N2C3	ALKBH5	UNKNOWN	SYBR	None	21.2186	21.2438	0.0957126	80.5071	0.1
260	K20	5N2C3	ALKBH5	UNKNOWN	SYBR	None	21.1633	21.2438	0.0957126	80.5071	0.1
261	K21	5N2C3	ALKBH5	UNKNOWN	SYBR	None	21.3496	21.2438	0.0957126	80.5071	0.1
283	L19	6N3C5	ALKBH5	UNKNOWN	SYBR	None	21.1942	21.4732	0.255662	80.5071	0.1
284	L20	6N3C5	ALKBH5	UNKNOWN	SYBR	None	21.5291	21.4732	0.255662	79.8475	0.1
285	L21	6N3C5	ALKBH5	UNKNOWN	SYBR	None	21.6963	21.4732	0.255662	80.3752	0.1
303	M15		ALKBH5	NTC	SYBR	None	Undetermined			61.4642	0.1
Analysis Type	Singleplex
Endogenous Control	Actin
RQ Min/Max Confidence Level	95.0
Reference Sample	1N3C3
