# Supplementary material for: METTL3-mediated m6A modification of has_circ_0007905 promotes age-related cataract progression through miR-6749-3p/EIF4EBP1
Source: PeerJ journal article supplement (doi:10.7717/peerj.14863), 2023-03-06
Supplement: Raw_data.zip [file 8 gene.xls]

## Sheet: Actin
Block Type	384-Well Block
Chemistry	SYBR_GREEN
Experiment Name	2022-09-30 103045 wangli
Experiment Run End Time	2022-09-30 20:53:08 PM CST
Experiment Type	Comparative Cт (ΔΔCт)
Instrument Type	QuantStudio(TM) 6 Flex System
Passive Reference	ROX
Quantification Cycle Method	Ct
Signal Smoothing On	true
Stage/ Cycle where Analysis is performed	Stage 2, Step 2
User Name
Well	Well Position	Sample Name	Target Name	Task	Reporter	Quencher	CT	Ct Mean	Ct SD	Tm1	Ct Threshold
1	A1	duizhaozu 1	Actin	UNKNOWN	SYBR	None	19.1105	19.1661	0.07048	88.1381	0.1
2	A2	duizhaozu 1	Actin	UNKNOWN	SYBR	None	19.1425	19.1661	0.07048	88.0063	0.1
3	A3	duizhaozu 1	Actin	UNKNOWN	SYBR	None	19.2454	19.1661	0.07048	88.0063	0.1
25	B1	duizhaozu 2	Actin	UNKNOWN	SYBR	None	19.7734	19.8292	0.0655388	88.0063	0.1
26	B2	duizhaozu 2	Actin	UNKNOWN	SYBR	None	19.8127	19.8292	0.0655388	88.1381	0.1
27	B3	duizhaozu 2	Actin	UNKNOWN	SYBR	None	19.9014	19.8292	0.0655388	88.1381	0.1
49	C1	3 N4C3	Actin	UNKNOWN	SYBR	None	20.5413	20.7528	0.183165	88.0063	0.1
50	C2	3 N4C3	Actin	UNKNOWN	SYBR	None	20.8562	20.7528	0.183165	88.1381	0.1
51	C3	3 N4C3	Actin	UNKNOWN	SYBR	None	20.8609	20.7528	0.183165	88.2699	0.1
73	D1	4 N3C3	Actin	UNKNOWN	SYBR	None	19.509	19.3882	0.143775	88.2699	0.1
74	D2	4 N3C3	Actin	UNKNOWN	SYBR	None	19.2292	19.3882	0.143775	88.2699	0.1
75	D3	4 N3C3	Actin	UNKNOWN	SYBR	None	19.4264	19.3882	0.143775	88.2699	0.1
97	E1	5 N4C4	Actin	UNKNOWN	SYBR	None	20.7746	20.6818	0.117075	88.1381	0.1
98	E2	5 N4C4	Actin	UNKNOWN	SYBR	None	20.5503	20.6818	0.117075	88.2699	0.1
99	E3	5 N4C4	Actin	UNKNOWN	SYBR	None	20.7205	20.6818	0.117075	88.2699	0.1
121	F1	6 N3C3	Actin	UNKNOWN	SYBR	None	19.2231	19.2034	0.0171232	88.2699	0.1
122	F2	6 N3C3	Actin	UNKNOWN	SYBR	None	19.1931	19.2034	0.0171232	88.2699	0.1
123	F3	6 N3C3	Actin	UNKNOWN	SYBR	None	19.1939	19.2034	0.0171232	88.2699	0.1
145	G1	1N3C3	Actin	UNKNOWN	SYBR	None	19.6098	19.4254	0.160919	88.2699	0.1
146	G2	1N3C3	Actin	UNKNOWN	SYBR	None	19.3135	19.4254	0.160919	88.2699	0.1
147	G3	1N3C3	Actin	UNKNOWN	SYBR	None	19.3529	19.4254	0.160919	88.2699	0.1
169	H1	2N2C2P2	Actin	UNKNOWN	SYBR	None	20.5166	20.6986	0.227007	88.2699	0.1
170	H2	2N2C2P2	Actin	UNKNOWN	SYBR	None	20.6262	20.6986	0.227007	88.4017	0.1
171	H3	2N2C2P2	Actin	UNKNOWN	SYBR	None	20.9529	20.6986	0.227007	88.4017	0.1
193	I1	3N3C3	Actin	UNKNOWN	SYBR	None	19.4217	19.4816	0.0941337	88.2699	0.1
194	I2	3N3C3	Actin	UNKNOWN	SYBR	None	19.4331	19.4816	0.0941337	88.4017	0.1
195	I3	3N3C3	Actin	UNKNOWN	SYBR	None	19.5901	19.4816	0.0941337	88.4017	0.1
217	J1	4N3C3	Actin	UNKNOWN	SYBR	None	19.8385	19.4884	0.303579	88.1381	0.1
218	J2	4N3C3	Actin	UNKNOWN	SYBR	None	19.2972	19.4884	0.303579	88.2699	0.1
219	J3	4N3C3	Actin	UNKNOWN	SYBR	None	19.3296	19.4884	0.303579	88.4017	0.1
241	K1	5N2C3	Actin	UNKNOWN	SYBR	None	19.0855	19.1433	0.0638215	88.2699	0.1
242	K2	5N2C3	Actin	UNKNOWN	SYBR	None	19.1326	19.1433	0.0638215	88.2699	0.1
243	K3	5N2C3	Actin	UNKNOWN	SYBR	None	19.2118	19.1433	0.0638215	88.2699	0.1
265	L1	6N3C5	Actin	UNKNOWN	SYBR	None	19.1834	19.1706	0.0552165	88.1381	0.1
266	L2	6N3C5	Actin	UNKNOWN	SYBR	None	19.2182	19.1706	0.0552165	88.1381	0.1
267	L3	6N3C5	Actin	UNKNOWN	SYBR	None	19.1101	19.1706	0.0552165	88.2699	0.1
355	O19		Actin	NTC	SYBR	None	Undetermined			61.6741	0.1
Analysis Type	Singleplex
Endogenous Control	Actin
RQ Min/Max Confidence Level	95.0
Reference Sample	1N3C3

## Sheet: hsa-circ-0007905
Block Type	384-Well Block
Chemistry	SYBR_GREEN
Experiment Name	2022-09-30 103045 wangli
Experiment Run End Time	2022-09-30 20:53:08 PM CST
Experiment Type	Comparative Cт (ΔΔCт)
Instrument Type	QuantStudio(TM) 6 Flex System
Passive Reference	ROX
Quantification Cycle Method	Ct
Signal Smoothing On	true
Stage/ Cycle where Analysis is performed	Stage 2, Step 2
User Name
Well	Well Position	Sample Name	Target Name	Task	Reporter	Quencher	CT	Ct Mean	Ct SD	Tm1	Ct Threshold
4	A4	duizhaozu 1	hsa-circ-0007905	UNKNOWN	SYBR	None	27.4665	27.6432	0.321597	80.0978	0.1
5	A5	duizhaozu 1	hsa-circ-0007905	UNKNOWN	SYBR	None	28.0144	27.6432	0.321597	80.0978	0.1
6	A6	duizhaozu 1	hsa-circ-0007905	UNKNOWN	SYBR	None	27.4487	27.6432	0.321597	80.0978	0.1
28	B4	duizhaozu 2	hsa-circ-0007905	UNKNOWN	SYBR	None	27.9096	28.105	0.322311	79.966	0.1
29	B5	duizhaozu 2	hsa-circ-0007905	UNKNOWN	SYBR	None	27.9284	28.105	0.322311	80.0978	0.1
30	B6	duizhaozu 2	hsa-circ-0007905	UNKNOWN	SYBR	None	28.477	28.105	0.322311	80.0978	0.1
52	C4	3 N4C3	hsa-circ-0007905	UNKNOWN	SYBR	None	25.7558	25.8115	0.136862	79.966	0.1
53	C5	3 N4C3	hsa-circ-0007905	UNKNOWN	SYBR	None	25.9674	25.8115	0.136862	79.966	0.1
54	C6	3 N4C3	hsa-circ-0007905	UNKNOWN	SYBR	None	25.7112	25.8115	0.136862	79.966	0.1
76	D4	4 N3C3	hsa-circ-0007905	UNKNOWN	SYBR	None	27.601	27.8572	0.256686	79.966	0.1
77	D5	4 N3C3	hsa-circ-0007905	UNKNOWN	SYBR	None	27.8564	27.8572	0.256686	79.8342	0.1
78	D6	4 N3C3	hsa-circ-0007905	UNKNOWN	SYBR	None	28.1143	27.8572	0.256686	79.966	0.1
100	E4	5 N4C4	hsa-circ-0007905	UNKNOWN	SYBR	None	27.407	27.6914	0.25479	79.966	0.1
101	E5	5 N4C4	hsa-circ-0007905	UNKNOWN	SYBR	None	27.8988	27.6914	0.25479	79.966	0.1
102	E6	5 N4C4	hsa-circ-0007905	UNKNOWN	SYBR	None	27.7683	27.6914	0.25479	79.966	0.1
124	F4	6 N3C3	hsa-circ-0007905	UNKNOWN	SYBR	None	27.1446	27.0047	0.361348	80.0978	0.1
125	F5	6 N3C3	hsa-circ-0007905	UNKNOWN	SYBR	None	26.5943	27.0047	0.361348	80.0978	0.1
126	F6	6 N3C3	hsa-circ-0007905	UNKNOWN	SYBR	None	27.2752	27.0047	0.361348	80.2296	0.1
148	G4	1N3C3	hsa-circ-0007905	UNKNOWN	SYBR	None	26.7785	26.8479	0.070489	79.966	0.1
149	G5	1N3C3	hsa-circ-0007905	UNKNOWN	SYBR	None	26.9195	26.8479	0.070489	80.0978	0.1
150	G6	1N3C3	hsa-circ-0007905	UNKNOWN	SYBR	None	26.8457	26.8479	0.070489	80.0978	0.1
172	H4	2N2C2P2	hsa-circ-0007905	UNKNOWN	SYBR	None	27.4998	27.2163	0.448179	79.966	0.1
173	H5	2N2C2P2	hsa-circ-0007905	UNKNOWN	SYBR	None	26.6996	27.2163	0.448179	80.0978	0.1
174	H6	2N2C2P2	hsa-circ-0007905	UNKNOWN	SYBR	None	27.4496	27.2163	0.448179	80.0978	0.1
196	I4	3N3C3	hsa-circ-0007905	UNKNOWN	SYBR	None	27.7637	27.4955	0.250118	80.0978	0.1
197	I5	3N3C3	hsa-circ-0007905	UNKNOWN	SYBR	None	27.4541	27.4955	0.250118	80.0978	0.1
198	I6	3N3C3	hsa-circ-0007905	UNKNOWN	SYBR	None	27.2686	27.4955	0.250118	80.0978	0.1
220	J4	4N3C3	hsa-circ-0007905	UNKNOWN	SYBR	None	27.2867	27.2917	0.055132	79.966	0.1
221	J5	4N3C3	hsa-circ-0007905	UNKNOWN	SYBR	None	27.2392	27.2917	0.055132	79.966	0.1
222	J6	4N3C3	hsa-circ-0007905	UNKNOWN	SYBR	None	27.3491	27.2917	0.055132	80.0978	0.1
244	K4	5N2C3	hsa-circ-0007905	UNKNOWN	SYBR	None	25.8068	25.9947	0.183826	80.0978	0.1
245	K5	5N2C3	hsa-circ-0007905	UNKNOWN	SYBR	None	26.0033	25.9947	0.183826	80.0978	0.1
246	K6	5N2C3	hsa-circ-0007905	UNKNOWN	SYBR	None	26.1742	25.9947	0.183826	80.2296	0.1
268	L4	6N3C5	hsa-circ-0007905	UNKNOWN	SYBR	None	27.0985	27.2793	0.47125	79.966	0.1
269	L5	6N3C5	hsa-circ-0007905	UNKNOWN	SYBR	None	26.9252	27.2793	0.47125	79.966	0.1
270	L6	6N3C5	hsa-circ-0007905	UNKNOWN	SYBR	None	27.8142	27.2793	0.47125	80.0978	0.1
356	O20		hsa-circ-0007905	NTC	SYBR	None	Undetermined			61.6338	0.1
Analysis Type	Singleplex
Endogenous Control	Actin
RQ Min/Max Confidence Level	95.0
Reference Sample	1N3C3

## Sheet: hsa-circ-0035228
Block Type	384-Well Block
Chemistry	SYBR_GREEN
Experiment Name	2022-09-30 103045 wangli
Experiment Run End Time	2022-09-30 20:53:08 PM CST
Experiment Type	Comparative Cт (ΔΔCт)
Instrument Type	QuantStudio(TM) 6 Flex System
Passive Reference	ROX
Quantification Cycle Method	Ct
Signal Smoothing On	true
Stage/ Cycle where Analysis is performed	Stage 2, Step 2
User Name
Well	Well Position	Sample Name	Target Name	Task	Reporter	Quencher	CT	Ct Mean	Ct SD	Tm1	Ct Threshold
7	A7	duizhaozu 1	hsa-circ-0035228	UNKNOWN	SYBR	None	25.8732	25.9669	0.119022	76.4071	0.1
8	A8	duizhaozu 1	hsa-circ-0035228	UNKNOWN	SYBR	None	25.9267	25.9669	0.119022	76.4071	0.1
9	A9	duizhaozu 1	hsa-circ-0035228	UNKNOWN	SYBR	None	26.1008	25.9669	0.119022	76.5389	0.1
31	B7	duizhaozu 2	hsa-circ-0035228	UNKNOWN	SYBR	None	26.8707	26.6601	0.336925	76.5389	0.1
32	B8	duizhaozu 2	hsa-circ-0035228	UNKNOWN	SYBR	None	26.838	26.6601	0.336925	76.5389	0.1
33	B9	duizhaozu 2	hsa-circ-0035228	UNKNOWN	SYBR	None	26.2715	26.6601	0.336925	76.5389	0.1
55	C7	3 N4C3	hsa-circ-0035228	UNKNOWN	SYBR	None	28.3339	28.4699	0.163846	76.5389	0.1
56	C8	3 N4C3	hsa-circ-0035228	UNKNOWN	SYBR	None	28.4241	28.4699	0.163846	76.5389	0.1
57	C9	3 N4C3	hsa-circ-0035228	UNKNOWN	SYBR	None	28.6518	28.4699	0.163846	76.5389	0.1
79	D7	4 N3C3	hsa-circ-0035228	UNKNOWN	SYBR	None	26.4915	26.7205	0.212409	76.5389	0.1
80	D8	4 N3C3	hsa-circ-0035228	UNKNOWN	SYBR	None	26.759	26.7205	0.212409	76.5389	0.1
81	D9	4 N3C3	hsa-circ-0035228	UNKNOWN	SYBR	None	26.9111	26.7205	0.212409	76.5389	0.1
103	E7	5 N4C4	hsa-circ-0035228	UNKNOWN	SYBR	None	27.8047	27.8001	0.0678485	76.5389	0.1
104	E8	5 N4C4	hsa-circ-0035228	UNKNOWN	SYBR	None	27.8655	27.8001	0.0678485	76.5389	0.1
105	E9	5 N4C4	hsa-circ-0035228	UNKNOWN	SYBR	None	27.73	27.8001	0.0678485	76.5389	0.1
127	F7	6 N3C3	hsa-circ-0035228	UNKNOWN	SYBR	None	27.8411	27.8255	0.401119	76.5389	0.1
128	F8	6 N3C3	hsa-circ-0035228	UNKNOWN	SYBR	None	27.4167	27.8255	0.401119	76.5389	0.1
129	F9	6 N3C3	hsa-circ-0035228	UNKNOWN	SYBR	None	28.2185	27.8255	0.401119	76.6707	0.1
151	G7	1N3C3	hsa-circ-0035228	UNKNOWN	SYBR	None	27.2266	26.94	0.252658	76.5389	0.1
152	G8	1N3C3	hsa-circ-0035228	UNKNOWN	SYBR	None	26.8442	26.94	0.252658	76.5389	0.1
153	G9	1N3C3	hsa-circ-0035228	UNKNOWN	SYBR	None	26.7493	26.94	0.252658	76.5389	0.1
175	H7	2N2C2P2	hsa-circ-0035228	UNKNOWN	SYBR	None	28.3067	28.2957	0.280819	76.6707	0.1
176	H8	2N2C2P2	hsa-circ-0035228	UNKNOWN	SYBR	None	28.0096	28.2957	0.280819	76.5389	0.1
177	H9	2N2C2P2	hsa-circ-0035228	UNKNOWN	SYBR	None	28.5709	28.2957	0.280819	76.4071	0.1
199	I7	3N3C3	hsa-circ-0035228	UNKNOWN	SYBR	None	27.7365	28.0185	0.307987	76.4071	0.1
200	I8	3N3C3	hsa-circ-0035228	UNKNOWN	SYBR	None	28.3471	28.0185	0.307987	76.5389	0.1
201	I9	3N3C3	hsa-circ-0035228	UNKNOWN	SYBR	None	27.9717	28.0185	0.307987	76.5389	0.1
223	J7	4N3C3	hsa-circ-0035228	UNKNOWN	SYBR	None	26.742	26.695	0.349648	76.5389	0.1
224	J8	4N3C3	hsa-circ-0035228	UNKNOWN	SYBR	None	26.3243	26.695	0.349648	76.5389	0.1
225	J9	4N3C3	hsa-circ-0035228	UNKNOWN	SYBR	None	27.0188	26.695	0.349648	76.5389	0.1
247	K7	5N2C3	hsa-circ-0035228	UNKNOWN	SYBR	None	26.6761	26.5332	0.188891	76.5389	0.1
248	K8	5N2C3	hsa-circ-0035228	UNKNOWN	SYBR	None	26.3191	26.5332	0.188891	76.4071	0.1
249	K9	5N2C3	hsa-circ-0035228	UNKNOWN	SYBR	None	26.6045	26.5332	0.188891	76.4071	0.1
271	L7	6N3C5	hsa-circ-0035228	UNKNOWN	SYBR	None	26.8726	26.6717	0.461619	76.4071	0.1
272	L8	6N3C5	hsa-circ-0035228	UNKNOWN	SYBR	None	26.9989	26.6717	0.461619	76.4071	0.1
273	L9	6N3C5	hsa-circ-0035228	UNKNOWN	SYBR	None	26.1437	26.6717	0.461619	76.4071	0.1
357	O21		hsa-circ-0035228	NTC	SYBR	None	Undetermined			61.9606	0.1
Analysis Type	Singleplex
Endogenous Control	Actin
RQ Min/Max Confidence Level	95.0
Reference Sample	1N3C3

## Sheet: hsa-circ-0065244
Block Type	384-Well Block
Chemistry	SYBR_GREEN
Experiment Name	2022-09-30 103045 wangli
Experiment Run End Time	2022-09-30 20:53:08 PM CST
Experiment Type	Comparative Cт (ΔΔCт)
Instrument Type	QuantStudio(TM) 6 Flex System
Passive Reference	ROX
Quantification Cycle Method	Ct
Signal Smoothing On	true
Stage/ Cycle where Analysis is performed	Stage 2, Step 2
User Name
Well	Well Position	Sample Name	Target Name	Task	Reporter	Quencher	CT	Ct Mean	Ct SD	Tm1	Ct Threshold
10	A10	duizhaozu 1	hsa-circ-0065244	UNKNOWN	SYBR	None	25.5206	25.2226	0.321756	79.5705	0.1
11	A11	duizhaozu 1	hsa-circ-0065244	UNKNOWN	SYBR	None	24.8814	25.2226	0.321756	79.5705	0.1
12	A12	duizhaozu 1	hsa-circ-0065244	UNKNOWN	SYBR	None	25.2659	25.2226	0.321756	79.5705	0.1
34	B10	duizhaozu 2	hsa-circ-0065244	UNKNOWN	SYBR	None	25.9061	25.6479	0.228934	79.5705	0.1
35	B11	duizhaozu 2	hsa-circ-0065244	UNKNOWN	SYBR	None	25.5676	25.6479	0.228934	79.5705	0.1
36	B12	duizhaozu 2	hsa-circ-0065244	UNKNOWN	SYBR	None	25.4698	25.6479	0.228934	79.5705	0.1
58	C10	3 N4C3	hsa-circ-0065244	UNKNOWN	SYBR	None	26.9438	27.1156	0.263523	79.5705	0.1
59	C11	3 N4C3	hsa-circ-0065244	UNKNOWN	SYBR	None	26.9841	27.1156	0.263523	79.5705	0.1
60	C12	3 N4C3	hsa-circ-0065244	UNKNOWN	SYBR	None	27.419	27.1156	0.263523	79.5705	0.1
82	D10	4 N3C3	hsa-circ-0065244	UNKNOWN	SYBR	None	25.7122	25.6652	0.0882579	79.5705	0.1
83	D11	4 N3C3	hsa-circ-0065244	UNKNOWN	SYBR	None	25.5634	25.6652	0.0882579	79.5705	0.1
84	D12	4 N3C3	hsa-circ-0065244	UNKNOWN	SYBR	None	25.7199	25.6652	0.0882579	79.4387	0.1
106	E10	5 N4C4	hsa-circ-0065244	UNKNOWN	SYBR	None	27.8453	27.518	0.322622	79.5705	0.1
107	E11	5 N4C4	hsa-circ-0065244	UNKNOWN	SYBR	None	27.5083	27.518	0.322622	79.5705	0.1
108	E12	5 N4C4	hsa-circ-0065244	UNKNOWN	SYBR	None	27.2003	27.518	0.322622	79.5705	0.1
130	F10	6 N3C3	hsa-circ-0065244	UNKNOWN	SYBR	None	25.9359	25.9359	0.386603	79.5705	0.1
131	F11	6 N3C3	hsa-circ-0065244	UNKNOWN	SYBR	None	25.5493	25.9359	0.386603	79.5705	0.1
132	F12	6 N3C3	hsa-circ-0065244	UNKNOWN	SYBR	None	26.3225	25.9359	0.386603	79.4387	0.1
154	G10	1N3C3	hsa-circ-0065244	UNKNOWN	SYBR	None	25.8542	25.7615	0.218527	79.5705	0.1
155	G11	1N3C3	hsa-circ-0065244	UNKNOWN	SYBR	None	25.9184	25.7615	0.218527	79.5705	0.1
156	G12	1N3C3	hsa-circ-0065244	UNKNOWN	SYBR	None	25.5119	25.7615	0.218527	79.7023	0.1
178	H10	2N2C2P2	hsa-circ-0065244	UNKNOWN	SYBR	None	26.9931	27.1724	0.171031	79.5705	0.1
179	H11	2N2C2P2	hsa-circ-0065244	UNKNOWN	SYBR	None	27.1904	27.1724	0.171031	79.7023	0.1
180	H12	2N2C2P2	hsa-circ-0065244	UNKNOWN	SYBR	None	27.3338	27.1724	0.171031	79.7023	0.1
202	I10	3N3C3	hsa-circ-0065244	UNKNOWN	SYBR	None	25.9934	26.1623	0.302258	79.5705	0.1
203	I11	3N3C3	hsa-circ-0065244	UNKNOWN	SYBR	None	25.9822	26.1623	0.302258	79.5705	0.1
204	I12	3N3C3	hsa-circ-0065244	UNKNOWN	SYBR	None	26.5112	26.1623	0.302258	79.5705	0.1
226	J10	4N3C3	hsa-circ-0065244	UNKNOWN	SYBR	None	25.4951	25.5698	0.0647416	79.5705	0.1
227	J11	4N3C3	hsa-circ-0065244	UNKNOWN	SYBR	None	25.6098	25.5698	0.0647416	79.4387	0.1
228	J12	4N3C3	hsa-circ-0065244	UNKNOWN	SYBR	None	25.6046	25.5698	0.0647416	79.5705	0.1
250	K10	5N2C3	hsa-circ-0065244	UNKNOWN	SYBR	None	24.6493	24.5815	0.07032	79.5705	0.1
251	K11	5N2C3	hsa-circ-0065244	UNKNOWN	SYBR	None	24.5863	24.5815	0.07032	79.5705	0.1
252	K12	5N2C3	hsa-circ-0065244	UNKNOWN	SYBR	None	24.5089	24.5815	0.07032	79.5705	0.1
274	L10	6N3C5	hsa-circ-0065244	UNKNOWN	SYBR	None	25.4098	25.6206	0.185217	79.5705	0.1
275	L11	6N3C5	hsa-circ-0065244	UNKNOWN	SYBR	None	25.6948	25.6206	0.185217	79.5705	0.1
276	L12	6N3C5	hsa-circ-0065244	UNKNOWN	SYBR	None	25.7572	25.6206	0.185217	79.5705	0.1
358	O22		hsa-circ-0065244	NTC	SYBR	None	Undetermined			61.7198	0.1
Analysis Type	Singleplex
Endogenous Control	Actin
RQ Min/Max Confidence Level	95.0
Reference Sample	1N3C3

## Sheet: hsa-circ-0003949
Block Type	384-Well Block
Chemistry	SYBR_GREEN
Experiment Name	2022-09-30 103045 wangli
Experiment Run End Time	2022-09-30 20:53:08 PM CST
Experiment Type	Comparative Cт (ΔΔCт)
Instrument Type	QuantStudio(TM) 6 Flex System
Passive Reference	ROX
Quantification Cycle Method	Ct
Signal Smoothing On	true
Stage/ Cycle where Analysis is performed	Stage 2, Step 2
User Name
Well	Well Position	Sample Name	Target Name	Task	Reporter	Quencher	CT	Ct Mean	Ct SD	Tm1	Ct Threshold
13	A13	duizhaozu 1	hsa-circ-0003949	UNKNOWN	SYBR	None	25.9309	25.9741	0.179223	80.625	0.1
14	A14	duizhaozu 1	hsa-circ-0003949	UNKNOWN	SYBR	None	26.171	25.9741	0.179223	80.625	0.1
15	A15	duizhaozu 1	hsa-circ-0003949	UNKNOWN	SYBR	None	25.8204	25.9741	0.179223	80.625	0.1
37	B13	duizhaozu 2	hsa-circ-0003949	UNKNOWN	SYBR	None	25.3705	25.3837	0.13426	80.625	0.1
38	B14	duizhaozu 2	hsa-circ-0003949	UNKNOWN	SYBR	None	25.5241	25.3837	0.13426	80.625	0.1
39	B15	duizhaozu 2	hsa-circ-0003949	UNKNOWN	SYBR	None	25.2566	25.3837	0.13426	80.625	0.1
61	C13	3 N4C3	hsa-circ-0003949	UNKNOWN	SYBR	None	27.1544	27.401	0.223209	80.625	0.1
62	C14	3 N4C3	hsa-circ-0003949	UNKNOWN	SYBR	None	27.5892	27.401	0.223209	80.625	0.1
63	C15	3 N4C3	hsa-circ-0003949	UNKNOWN	SYBR	None	27.4594	27.401	0.223209	80.625	0.1
85	D13	4 N3C3	hsa-circ-0003949	UNKNOWN	SYBR	None	27.2158	27.2004	0.0325083	80.625	0.1
86	D14	4 N3C3	hsa-circ-0003949	UNKNOWN	SYBR	None	27.163	27.2004	0.0325083	80.625	0.1
87	D15	4 N3C3	hsa-circ-0003949	UNKNOWN	SYBR	None	27.2223	27.2004	0.0325083	80.625	0.1
109	E13	5 N4C4	hsa-circ-0003949	UNKNOWN	SYBR	None	30.3784	29.9443	0.43447	80.625	0.1
110	E14	5 N4C4	hsa-circ-0003949	UNKNOWN	SYBR	None	29.5095	29.9443	0.43447	80.625	0.1
111	E15	5 N4C4	hsa-circ-0003949	UNKNOWN	SYBR	None	29.9451	29.9443	0.43447	80.625	0.1
133	F13	6 N3C3	hsa-circ-0003949	UNKNOWN	SYBR	None	27.3803	27.2225	0.138263	80.625	0.1
134	F14	6 N3C3	hsa-circ-0003949	UNKNOWN	SYBR	None	27.1224	27.2225	0.138263	80.625	0.1
135	F15	6 N3C3	hsa-circ-0003949	UNKNOWN	SYBR	None	27.1648	27.2225	0.138263	80.625	0.1
157	G13	1N3C3	hsa-circ-0003949	UNKNOWN	SYBR	None	26.9914	27.2657	0.374554	80.625	0.1
158	G14	1N3C3	hsa-circ-0003949	UNKNOWN	SYBR	None	27.6925	27.2657	0.374554	80.625	0.1
159	G15	1N3C3	hsa-circ-0003949	UNKNOWN	SYBR	None	27.1133	27.2657	0.374554	80.625	0.1
181	H13	2N2C2P2	hsa-circ-0003949	UNKNOWN	SYBR	None	26.7448	27.0263	0.427471	80.625	0.1
182	H14	2N2C2P2	hsa-circ-0003949	UNKNOWN	SYBR	None	27.5182	27.0263	0.427471	80.625	0.1
183	H15	2N2C2P2	hsa-circ-0003949	UNKNOWN	SYBR	None	26.8159	27.0263	0.427471	80.625	0.1
205	I13	3N3C3	hsa-circ-0003949	UNKNOWN	SYBR	None	27.7445	27.9009	0.178785	80.625	0.1
206	I14	3N3C3	hsa-circ-0003949	UNKNOWN	SYBR	None	27.8623	27.9009	0.178785	80.625	0.1
207	I15	3N3C3	hsa-circ-0003949	UNKNOWN	SYBR	None	28.0958	27.9009	0.178785	80.625	0.1
229	J13	4N3C3	hsa-circ-0003949	UNKNOWN	SYBR	None	27.6856	27.5233	0.183466	80.625	0.1
230	J14	4N3C3	hsa-circ-0003949	UNKNOWN	SYBR	None	27.5602	27.5233	0.183466	80.625	0.1
231	J15	4N3C3	hsa-circ-0003949	UNKNOWN	SYBR	None	27.3242	27.5233	0.183466	80.4932	0.1
253	K13	5N2C3	hsa-circ-0003949	UNKNOWN	SYBR	None	25.7453	25.6101	0.11781	80.625	0.1
254	K14	5N2C3	hsa-circ-0003949	UNKNOWN	SYBR	None	25.5561	25.6101	0.11781	80.625	0.1
255	K15	5N2C3	hsa-circ-0003949	UNKNOWN	SYBR	None	25.529	25.6101	0.11781	80.625	0.1
277	L13	6N3C5	hsa-circ-0003949	UNKNOWN	SYBR	None	27.8094	27.6207	0.29627	80.625	0.1
278	L14	6N3C5	hsa-circ-0003949	UNKNOWN	SYBR	None	27.2792	27.6207	0.29627	80.625	0.1
279	L15	6N3C5	hsa-circ-0003949	UNKNOWN	SYBR	None	27.7735	27.6207	0.29627	80.625	0.1
359	O23		hsa-circ-0003949	NTC	SYBR	None	Undetermined			61.0695	0.1
Analysis Type	Singleplex
Endogenous Control	Actin
RQ Min/Max Confidence Level	95.0
Reference Sample	1N3C3

## Sheet: hsa-circ-0022997
Block Type	384-Well Block
Chemistry	SYBR_GREEN
Experiment Name	2022-09-30 103045 wangli
Experiment Run End Time	2022-09-30 20:53:08 PM CST
Experiment Type	Comparative Cт (ΔΔCт)
Instrument Type	QuantStudio(TM) 6 Flex System
Passive Reference	ROX
Quantification Cycle Method	Ct
Signal Smoothing On	true
Stage/ Cycle where Analysis is performed	Stage 2, Step 2
User Name
Well	Well Position	Sample Name	Target Name	Task	Reporter	Quencher	CT	Ct Mean	Ct SD	Tm1	Ct Threshold
16	A16	duizhaozu 1	hsa-circ-0022997	UNKNOWN	SYBR	None	27.7973	27.6858	0.148071	82.9976	0.1
17	A17	duizhaozu 1	hsa-circ-0022997	UNKNOWN	SYBR	None	27.7422	27.6858	0.148071	82.9976	0.1
18	A18	duizhaozu 1	hsa-circ-0022997	UNKNOWN	SYBR	None	27.5178	27.6858	0.148071	82.8658	0.1
40	B16	duizhaozu 2	hsa-circ-0022997	UNKNOWN	SYBR	None	28.4693	28.8579	0.493736	82.9976	0.1
41	B17	duizhaozu 2	hsa-circ-0022997	UNKNOWN	SYBR	None	29.4135	28.8579	0.493736	83.1294	0.1
42	B18	duizhaozu 2	hsa-circ-0022997	UNKNOWN	SYBR	None	28.691	28.8579	0.493736	82.8658	0.1
64	C16	3 N4C3	hsa-circ-0022997	UNKNOWN	SYBR	None	28.9552	29.0783	0.424695	83.2612	0.1
65	C17	3 N4C3	hsa-circ-0022997	UNKNOWN	SYBR	None	28.7288	29.0783	0.424695	83.2612	0.1
66	C18	3 N4C3	hsa-circ-0022997	UNKNOWN	SYBR	None	29.551	29.0783	0.424695	82.8658	0.1
88	D16	4 N3C3	hsa-circ-0022997	UNKNOWN	SYBR	None	28.7074	28.7171	0.0450677	83.1294	0.1
89	D17	4 N3C3	hsa-circ-0022997	UNKNOWN	SYBR	None	28.7662	28.7171	0.0450677	82.8658	0.1
90	D18	4 N3C3	hsa-circ-0022997	UNKNOWN	SYBR	None	28.6776	28.7171	0.0450677	82.9976	0.1
112	E16	5 N4C4	hsa-circ-0022997	UNKNOWN	SYBR	None	30.41	30.4263	0.224104	82.9976	0.1
113	E17	5 N4C4	hsa-circ-0022997	UNKNOWN	SYBR	None	30.2108	30.4263	0.224104	84.4475	0.1
114	E18	5 N4C4	hsa-circ-0022997	UNKNOWN	SYBR	None	30.6582	30.4263	0.224104	82.9976	0.1
136	F16	6 N3C3	hsa-circ-0022997	UNKNOWN	SYBR	None	28.8359	29.1802	0.302146	82.9976	0.1
137	F17	6 N3C3	hsa-circ-0022997	UNKNOWN	SYBR	None	29.3032	29.1802	0.302146	82.9976	0.1
138	F18	6 N3C3	hsa-circ-0022997	UNKNOWN	SYBR	None	29.4014	29.1802	0.302146	82.9976	0.1
160	G16	1N3C3	hsa-circ-0022997	UNKNOWN	SYBR	None	30.3407	30.573	0.202583	82.8658	0.1
161	G17	1N3C3	hsa-circ-0022997	UNKNOWN	SYBR	None	30.7129	30.573	0.202583	82.9976	0.1
162	G18	1N3C3	hsa-circ-0022997	UNKNOWN	SYBR	None	30.6654	30.573	0.202583	82.9976	0.1
184	H16	2N2C2P2	hsa-circ-0022997	UNKNOWN	SYBR	None	30.9435	30.7532	0.174841	84.5793	0.1
185	H17	2N2C2P2	hsa-circ-0022997	UNKNOWN	SYBR	None	30.5997	30.7532	0.174841	83.393	0.1
186	H18	2N2C2P2	hsa-circ-0022997	UNKNOWN	SYBR	None	30.7162	30.7532	0.174841	82.9976	0.1
208	I16	3N3C3	hsa-circ-0022997	UNKNOWN	SYBR	None	29.5554	29.4678	0.24955	82.9976	0.1
209	I17	3N3C3	hsa-circ-0022997	UNKNOWN	SYBR	None	29.1863	29.4678	0.24955	83.1294	0.1
210	I18	3N3C3	hsa-circ-0022997	UNKNOWN	SYBR	None	29.6618	29.4678	0.24955	82.9976	0.1
232	J16	4N3C3	hsa-circ-0022997	UNKNOWN	SYBR	None	29.2309	28.8968	0.305532	82.9976	0.1
233	J17	4N3C3	hsa-circ-0022997	UNKNOWN	SYBR	None	28.828	28.8968	0.305532	83.7884	0.1
234	J18	4N3C3	hsa-circ-0022997	UNKNOWN	SYBR	None	28.6315	28.8968	0.305532	82.9976	0.1
256	K16	5N2C3	hsa-circ-0022997	UNKNOWN	SYBR	None	27.669	27.9215	0.285499	82.9976	0.1
257	K17	5N2C3	hsa-circ-0022997	UNKNOWN	SYBR	None	27.8642	27.9215	0.285499	83.1294	0.1
258	K18	5N2C3	hsa-circ-0022997	UNKNOWN	SYBR	None	28.2313	27.9215	0.285499	82.9976	0.1
280	L16	6N3C5	hsa-circ-0022997	UNKNOWN	SYBR	None	28.2222	28.4053	0.158749	82.9976	0.1
281	L17	6N3C5	hsa-circ-0022997	UNKNOWN	SYBR	None	28.5044	28.4053	0.158749	82.8658	0.1
282	L18	6N3C5	hsa-circ-0022997	UNKNOWN	SYBR	None	28.4894	28.4053	0.158749	82.3385	0.1
360	O24		hsa-circ-0022997	NTC	SYBR	None	Undetermined			61.7165	0.1
Analysis Type	Singleplex
Endogenous Control	Actin
RQ Min/Max Confidence Level	95.0
Reference Sample	1N3C3

## Sheet: METTL3
Block Type	384-Well Block
Chemistry	SYBR_GREEN
Experiment Name	2022-09-30 103045 wangli
Experiment Run End Time	2022-09-30 20:53:08 PM CST
Experiment Type	Comparative Cт (ΔΔCт)
Instrument Type	QuantStudio(TM) 6 Flex System
Passive Reference	ROX
Quantification Cycle Method	Ct
Signal Smoothing On	true
Stage/ Cycle where Analysis is performed	Stage 2, Step 2
User Name
Well	Well Position	Sample Name	Target Name	Task	Reporter	Quencher	CT	Ct Mean	Ct SD	Tm1	Ct Threshold
19	A19	duizhaozu 1	METTL3	UNKNOWN	SYBR	None	26.389	26.2966	0.0893181	82.6021	0.1
20	A20	duizhaozu 1	METTL3	UNKNOWN	SYBR	None	26.2107	26.2966	0.0893181	82.6021	0.1
21	A21	duizhaozu 1	METTL3	UNKNOWN	SYBR	None	26.2901	26.2966	0.0893181	82.4703	0.1
43	B19	duizhaozu 2	METTL3	UNKNOWN	SYBR	None	26.2895	26.3411	0.0939965	82.4703	0.1
44	B20	duizhaozu 2	METTL3	UNKNOWN	SYBR	None	26.2842	26.3411	0.0939965	82.6021	0.1
45	B21	duizhaozu 2	METTL3	UNKNOWN	SYBR	None	26.4496	26.3411	0.0939965	82.6021	0.1
67	C19	3 N4C3	METTL3	UNKNOWN	SYBR	None	24.6794	24.6811	0.0732969	82.4703	0.1
68	C20	3 N4C3	METTL3	UNKNOWN	SYBR	None	24.6087	24.6811	0.0732969	82.4703	0.1
69	C21	3 N4C3	METTL3	UNKNOWN	SYBR	None	24.7553	24.6811	0.0732969	82.4703	0.1
91	D19	4 N3C3	METTL3	UNKNOWN	SYBR	None	25.2348	24.9805	0.234533	82.6021	0.1
92	D20	4 N3C3	METTL3	UNKNOWN	SYBR	None	24.9342	24.9805	0.234533	82.4703	0.1
93	D21	4 N3C3	METTL3	UNKNOWN	SYBR	None	24.7726	24.9805	0.234533	82.6021	0.1
115	E19	5 N4C4	METTL3	UNKNOWN	SYBR	None	25.8597	25.5986	0.296836	82.4703	0.1
116	E20	5 N4C4	METTL3	UNKNOWN	SYBR	None	25.6604	25.5986	0.296836	82.3385	0.1
117	E21	5 N4C4	METTL3	UNKNOWN	SYBR	None	25.2758	25.5986	0.296836	82.4703	0.1
139	F19	6 N3C3	METTL3	UNKNOWN	SYBR	None	24.7541	24.7915	0.0620558	82.6021	0.1
140	F20	6 N3C3	METTL3	UNKNOWN	SYBR	None	24.8631	24.7915	0.0620558	82.6021	0.1
141	F21	6 N3C3	METTL3	UNKNOWN	SYBR	None	24.7572	24.7915	0.0620558	82.6021	0.1
163	G19	1N3C3	METTL3	UNKNOWN	SYBR	None	24.9416	24.9458	0.170259	82.6021	0.1
164	G20	1N3C3	METTL3	UNKNOWN	SYBR	None	24.7776	24.9458	0.170259	82.6021	0.1
165	G21	1N3C3	METTL3	UNKNOWN	SYBR	None	25.1181	24.9458	0.170259	82.6021	0.1
187	H19	2N2C2P2	METTL3	UNKNOWN	SYBR	None	24.7755	24.8326	0.0507042	82.6021	0.1
188	H20	2N2C2P2	METTL3	UNKNOWN	SYBR	None	24.8722	24.8326	0.0507042	82.6021	0.1
189	H21	2N2C2P2	METTL3	UNKNOWN	SYBR	None	24.8502	24.8326	0.0507042	82.6021	0.1
211	I19	3N3C3	METTL3	UNKNOWN	SYBR	None	25.2393	25.0503	0.240144	82.6021	0.1
212	I20	3N3C3	METTL3	UNKNOWN	SYBR	None	25.1315	25.0503	0.240144	82.6021	0.1
213	I21	3N3C3	METTL3	UNKNOWN	SYBR	None	24.7801	25.0503	0.240144	82.6021	0.1
235	J19	4N3C3	METTL3	UNKNOWN	SYBR	None	25.706	25.6083	0.102065	82.6021	0.1
236	J20	4N3C3	METTL3	UNKNOWN	SYBR	None	25.6167	25.6083	0.102065	82.4703	0.1
237	J21	4N3C3	METTL3	UNKNOWN	SYBR	None	25.5023	25.6083	0.102065	82.4703	0.1
259	K19	5N2C3	METTL3	UNKNOWN	SYBR	None	24.9092	24.7408	0.148824	82.6021	0.1
260	K20	5N2C3	METTL3	UNKNOWN	SYBR	None	24.6271	24.7408	0.148824	82.6021	0.1
261	K21	5N2C3	METTL3	UNKNOWN	SYBR	None	24.686	24.7408	0.148824	82.6021	0.1
283	L19	6N3C5	METTL3	UNKNOWN	SYBR	None	25.0123	24.9696	0.348114	82.6021	0.1
284	L20	6N3C5	METTL3	UNKNOWN	SYBR	None	24.6021	24.9696	0.348114	82.2067	0.1
285	L21	6N3C5	METTL3	UNKNOWN	SYBR	None	25.2944	24.9696	0.348114	82.4703	0.1
379	P19		METTL3	NTC	SYBR	None	Undetermined			61.7198	0.1
Analysis Type	Singleplex
Endogenous Control	Actin
RQ Min/Max Confidence Level	95.0
Reference Sample	1N3C3

## Sheet: METTL14
Block Type	384-Well Block
Chemistry	SYBR_GREEN
Experiment Name	2022-09-30 103045 wangli
Experiment Run End Time	2022-09-30 20:53:08 PM CST
Experiment Type	Comparative Cт (ΔΔCт)
Instrument Type	QuantStudio(TM) 6 Flex System
Passive Reference	ROX
Quantification Cycle Method	Ct
Signal Smoothing On	true
Stage/ Cycle where Analysis is performed	Stage 2, Step 2
User Name
Well	Well Position	Sample Name	Target Name	Task	Reporter	Quencher	CT	Ct Mean	Ct SD	Tm1	Ct Threshold
22	A22	duizhaozu 1	METTL14	UNKNOWN	SYBR	None	25.343	25.1721	0.227053	72.5847	0.1
23	A23	duizhaozu 1	METTL14	UNKNOWN	SYBR	None	25.2589	25.1721	0.227053	72.7165	0.1
24	A24	duizhaozu 1	METTL14	UNKNOWN	SYBR	None	24.9145	25.1721	0.227053	72.7165	0.1
46	B22	duizhaozu 2	METTL14	UNKNOWN	SYBR	None	25.401	25.4211	0.196507	72.7165	0.1
47	B23	duizhaozu 2	METTL14	UNKNOWN	SYBR	None	25.2353	25.4211	0.196507	72.7165	0.1
48	B24	duizhaozu 2	METTL14	UNKNOWN	SYBR	None	25.6268	25.4211	0.196507	72.7165	0.1
70	C22	3 N4C3	METTL14	UNKNOWN	SYBR	None	26.2628	26.267	0.0850571	72.8483	0.1
71	C23	3 N4C3	METTL14	UNKNOWN	SYBR	None	26.3541	26.267	0.0850571	72.8483	0.1
72	C24	3 N4C3	METTL14	UNKNOWN	SYBR	None	26.1841	26.267	0.0850571	72.7165	0.1
94	D22	4 N3C3	METTL14	UNKNOWN	SYBR	None	26.3154	26.0704	0.472043	72.4529	0.1
95	D23	4 N3C3	METTL14	UNKNOWN	SYBR	None	25.5263	26.0704	0.472043	72.7165	0.1
96	D24	4 N3C3	METTL14	UNKNOWN	SYBR	None	26.3697	26.0704	0.472043	72.5847	0.1
118	E22	5 N4C4	METTL14	UNKNOWN	SYBR	None	26.8435	26.8811	0.0593343	72.8483	0.1
119	E23	5 N4C4	METTL14	UNKNOWN	SYBR	None	26.9495	26.8811	0.0593343	72.7165	0.1
120	E24	5 N4C4	METTL14	UNKNOWN	SYBR	None	26.8503	26.8811	0.0593343	72.8483	0.1
142	F22	6 N3C3	METTL14	UNKNOWN	SYBR	None	25.465	25.256	0.351114	72.8483	0.1
143	F23	6 N3C3	METTL14	UNKNOWN	SYBR	None	25.4522	25.256	0.351114	72.8483	0.1
144	F24	6 N3C3	METTL14	UNKNOWN	SYBR	None	24.8506	25.256	0.351114	72.7165	0.1
166	G22	1N3C3	METTL14	UNKNOWN	SYBR	None	25.8115	25.6163	0.231975	72.8483	0.1
167	G23	1N3C3	METTL14	UNKNOWN	SYBR	None	25.6776	25.6163	0.231975	72.8483	0.1
168	G24	1N3C3	METTL14	UNKNOWN	SYBR	None	25.3599	25.6163	0.231975	72.8483	0.1
190	H22	2N2C2P2	METTL14	UNKNOWN	SYBR	None	27.1653	26.8864	0.242888	72.7165	0.1
191	H23	2N2C2P2	METTL14	UNKNOWN	SYBR	None	26.7215	26.8864	0.242888	72.8483	0.1
192	H24	2N2C2P2	METTL14	UNKNOWN	SYBR	None	26.7724	26.8864	0.242888	72.8483	0.1
214	I22	3N3C3	METTL14	UNKNOWN	SYBR	None	25.2684	25.4213	0.348749	72.8483	0.1
215	I23	3N3C3	METTL14	UNKNOWN	SYBR	None	25.8203	25.4213	0.348749	72.7165	0.1
216	I24	3N3C3	METTL14	UNKNOWN	SYBR	None	25.1751	25.4213	0.348749	72.7165	0.1
238	J22	4N3C3	METTL14	UNKNOWN	SYBR	None	26.0931	26.0199	0.0633949	72.7165	0.1
239	J23	4N3C3	METTL14	UNKNOWN	SYBR	None	25.9836	26.0199	0.0633949	72.7165	0.1
240	J24	4N3C3	METTL14	UNKNOWN	SYBR	None	25.9829	26.0199	0.0633949	72.7165	0.1
262	K22	5N2C3	METTL14	UNKNOWN	SYBR	None	24.8276	25.1293	0.26577	72.7165	0.1
263	K23	5N2C3	METTL14	UNKNOWN	SYBR	None	25.2317	25.1293	0.26577	72.7165	0.1
264	K24	5N2C3	METTL14	UNKNOWN	SYBR	None	25.3286	25.1293	0.26577	72.7165	0.1
286	L22	6N3C5	METTL14	UNKNOWN	SYBR	None	24.8692	25.2673	0.397879	72.7165	0.1
287	L23	6N3C5	METTL14	UNKNOWN	SYBR	None	25.6649	25.2673	0.397879	72.7165	0.1
288	L24	6N3C5	METTL14	UNKNOWN	SYBR	None	25.2677	25.2673	0.397879	72.7165	0.1
380	P20		METTL14	NTC	SYBR	None	Undetermined			61.4246	0.1
Analysis Type	Singleplex
Endogenous Control	Actin
RQ Min/Max Confidence Level	95.0
Reference Sample	1N3C3

## Sheet: FTO
Block Type	384-Well Block
Chemistry	SYBR_GREEN
Experiment Name	2022-09-30 103045 wangli
Experiment Run End Time	2022-09-30 20:53:08 PM CST
Experiment Type	Comparative Cт (ΔΔCт)
Instrument Type	QuantStudio(TM) 6 Flex System
Passive Reference	ROX
Quantification Cycle Method	Ct
Signal Smoothing On	true
Stage/ Cycle where Analysis is performed	Stage 2, Step 2
User Name
Well	Well Position	Sample Name	Target Name	Task	Reporter	Quencher	CT	Ct Mean	Ct SD	Tm1	Ct Threshold
298	M10	duizhaozu 1	FTO	UNKNOWN	SYBR	None	22.9195	23.0217	0.139465	76.2753	0.1
299	M11	duizhaozu 1	FTO	UNKNOWN	SYBR	None	22.9651	23.0217	0.139465	76.5389	0.1
300	M12	duizhaozu 1	FTO	UNKNOWN	SYBR	None	23.1806	23.0217	0.139465	76.0117	0.1
322	N10	duizhaozu 2	FTO	UNKNOWN	SYBR	None	23.6252	23.5036	0.146949	76.1435	0.1
323	N11	duizhaozu 2	FTO	UNKNOWN	SYBR	None	23.5453	23.5036	0.146949	76.4071	0.1
324	N12	duizhaozu 2	FTO	UNKNOWN	SYBR	None	23.3403	23.5036	0.146949	76.1435	0.1
346	O10	3 N4C3	FTO	UNKNOWN	SYBR	None	24.5631	24.4981	0.136436	76.1435	0.1
347	O11	3 N4C3	FTO	UNKNOWN	SYBR	None	24.3413	24.4981	0.136436	76.0117	0.1
348	O12	3 N4C3	FTO	UNKNOWN	SYBR	None	24.59	24.4981	0.136436	76.6707	0.1
370	P10	4 N3C3	FTO	UNKNOWN	SYBR	None	23.4179	23.2423	0.155785	76.0117	0.1
371	P11	4 N3C3	FTO	UNKNOWN	SYBR	None	23.1205	23.2423	0.155785	76.6707	0.1
372	P12	4 N3C3	FTO	UNKNOWN	SYBR	None	23.1886	23.2423	0.155785	76.0117	0.1
301	M13	5 N4C4	FTO	UNKNOWN	SYBR	None	24.9956	25.11	0.177057	76.2753	0.1
302	M14	5 N4C4	FTO	UNKNOWN	SYBR	None	25.0205	25.11	0.177057	76.4071	0.1
303	M15	5 N4C4	FTO	UNKNOWN	SYBR	None	25.314	25.11	0.177057	76.4071	0.1
325	N13	6 N3C3	FTO	UNKNOWN	SYBR	None	22.9351	23.2936	0.324842	76.4071	0.1
326	N14	6 N3C3	FTO	UNKNOWN	SYBR	None	23.5684	23.2936	0.324842	75.8799	0.1
327	N15	6 N3C3	FTO	UNKNOWN	SYBR	None	23.3772	23.2936	0.324842	76.4071	0.1
349	O13	1N3C3	FTO	UNKNOWN	SYBR	None	23.5044	23.532	0.0683289	75.8799	0.1
350	O14	1N3C3	FTO	UNKNOWN	SYBR	None	23.6098	23.532	0.0683289	75.7481	0.1
351	O15	1N3C3	FTO	UNKNOWN	SYBR	None	23.4817	23.532	0.0683289	75.8799	0.1
373	P13	2N2C2P2	FTO	UNKNOWN	SYBR	None	23.5756	23.709	0.165979	76.4071	0.1
374	P14	2N2C2P2	FTO	UNKNOWN	SYBR	None	23.8948	23.709	0.165979	75.8799	0.1
375	P15	2N2C2P2	FTO	UNKNOWN	SYBR	None	23.6565	23.709	0.165979	76.5389	0.1
304	M16	3N3C3	FTO	UNKNOWN	SYBR	None	23.7888	23.6404	0.146791	76.5389	0.1
305	M17	3N3C3	FTO	UNKNOWN	SYBR	None	23.6372	23.6404	0.146791	76.0117	0.1
306	M18	3N3C3	FTO	UNKNOWN	SYBR	None	23.4953	23.6404	0.146791	76.5389	0.1
328	N16	4N3C3	FTO	UNKNOWN	SYBR	None	24.0231	23.6949	0.368128	76.0117	0.1
329	N17	4N3C3	FTO	UNKNOWN	SYBR	None	23.7649	23.6949	0.368128	76.5389	0.1
330	N18	4N3C3	FTO	UNKNOWN	SYBR	None	23.2969	23.6949	0.368128	75.8799	0.1
352	O16	5N2C3	FTO	UNKNOWN	SYBR	None	22.8484	22.9456	0.211634	75.9377	0.1
353	O17	5N2C3	FTO	UNKNOWN	SYBR	None	22.7999	22.9456	0.211634	76.0117	0.1
354	O18	5N2C3	FTO	UNKNOWN	SYBR	None	23.1883	22.9456	0.211634	75.089	0.1
376	P16	6N3C5	FTO	UNKNOWN	SYBR	None	23.7012	23.5955	0.141186	75.6163	0.1
377	P17	6N3C5	FTO	UNKNOWN	SYBR	None	23.4352	23.5955	0.141186	76.2753	0.1
378	P18	6N3C5	FTO	UNKNOWN	SYBR	None	23.6502	23.5955	0.141186	75.7481	0.1
381	P21		FTO	NTC	SYBR	None	Undetermined			61.5161	0.1
Analysis Type	Singleplex
Endogenous Control	Actin
RQ Min/Max Confidence Level	95.0
Reference Sample	1N3C3
