# Supplementary material for: METTL3-mediated m6A modification of has_circ_0007905 promotes age-related cataract progression through miR-6749-3p/EIF4EBP1
Source: PeerJ journal article supplement (doi:10.7717/peerj.14863), 2023-03-06
Supplement: Raw_data.zip [file Corrected data.xls]

## Sheet: Sheet3
	Sample Name	Actin	EIF4EBP1	Delta Ct	Delta Delta Ct	RQ（2-Delta Delta Ct）
	HLE-B3 NC-1	17.2546	19.2991	2.0445	0	1	0.944407
	HLE-B3 NC-2	17.4647	19.2963	1.83159	-0.212916	1.15903	1.09459
	HLE-B3 NC-3	17.189	19.2084	2.01938	-0.0251249	1.01757	0.960998
	HLE-B3 EIF4EBP1 OE-1	17.1997	13.8867	-3.31296	-5.35746	40.9975	38.7183
	HLE-B3 EIF4EBP1 OE-2	17.2371	13.9957	-3.2414	-5.2859	39.0134	36.8446
	HLE-B3 EIF4EBP1 OE-3	17.2987	14.041	-3.25769	-5.30219	39.4564	37.2629
	HLE-B3 NC					1.05887
	HLE-B3 EIF4EBP1 OE					39.8224
	HLE-B3 EIF4EBP1 OE/HLE-B3 NC					37.6086
	p value					3.51641e-07
