# Supplementary material for: METTL3-mediated m6A modification of has_circ_0007905 promotes age-related cataract progression through miR-6749-3p/EIF4EBP1
Source: PeerJ journal article supplement (doi:10.7717/peerj.14863), 2023-03-06
Supplement: Raw_data.zip [file Corrected data.xls]

## Sheet: Sheet3
	Sample Name	Actin	METTL3	Delta Ct	Delta Delta Ct	RQ（2-Delta Delta Ct）
	si-NC-1	14.4771	22.6122	8.13512	0	1	1.01409
	si-NC-2	14.4214	22.4916	8.07025	-0.0648699	1.04599	1.06072
	si-NC-3	14.4115	22.6789	8.26748	0.132358	0.912339	0.92519
	si-968-1	14.4113	23.2299	8.81855	0.683427	0.622684	0.631455
	si-968-2	14.4335	23.1981	8.76464	0.629518	0.646392	0.655497
	si-968-3	14.3376	23.3409	9.00331	0.868184	0.547836	0.555553
	si-1086-1	14.4891	23.279	8.78981	0.654687	0.635213	0.644161
	si-1086-2	14.5039	23.3212	8.81732	0.682193	0.623217	0.631996
	si-1086-3	14.5366	23.1822	8.64565	0.510529	0.701965	0.711853
	si-1604-1	14.4332	23.1826	8.74948	0.614354	0.653222	0.662424
	si-1604-2	14.4484	23.1985	8.75007	0.614949	0.652953	0.66215
	si-1604-3	14.3225	23.3428	9.02029	0.885168	0.541424	0.549051
	si-NC					0.98611
	si-968					0.605638
	si-1086					0.653465
	si-1604					0.615867	p value
	si-968/si-NC					0.614168	0.00150383
	si-1086/si-NC					0.66267	0.00197622
	si-1604/si-NC					0.624542	0.00237846
