# Supplementary material for: METTL3-mediated m6A modification of has_circ_0007905 promotes age-related cataract progression through miR-6749-3p/EIF4EBP1
Source: PeerJ journal article supplement (doi:10.7717/peerj.14863), 2023-03-06
Supplement: Raw_data.zip [file Corrected data.xls]

## Sheet: Sheet3
	Sample Name	Actin	hsa-circ-0007905	Delta Ct	Delta Delta Ct	RQ（2-Delta Delta Ct）
	si-METTL3-NC-1	14.4656	23.6517	9.18606	0	1	1.09487
	si-METTL3-NC-2	14.4048	23.6977	9.29282	0.106768	0.928666	1.01677
	si-METTL3-NC-3	14.2638	23.7514	9.48761	0.301556	0.811377	0.888355
	si-METTL3-968-1	14.1606	23.8592	9.69862	0.512567	0.700974	0.767478
	si-METTL3-968-2	14.1992	24.0653	9.86613	0.680069	0.624135	0.683349
	si-METTL3-968-3	14.1354	24.0245	9.88902	0.702961	0.61431	0.672592
	si-METTL3-NC					0.913348
	si-METTL3-968					0.646473
	si-METTL3-968/si-METTL3-NC					0.707806
	p value					0.0122139
