# Supplementary material for: METTL3-mediated m6A modification of has_circ_0007905 promotes age-related cataract progression through miR-6749-3p/EIF4EBP1
Source: PeerJ journal article supplement (doi:10.7717/peerj.14863), 2023-03-06
Supplement: Raw_data.zip [file Corrected data.xls]

## Sheet: Sheet8
	Sample Name	Actin	WNT7B	Delta Ct	Delta Delta Ct	RQ（2-Delta Delta Ct）
	si-NC-1	16.1249	19.3074	3.18243	0	1	1.16187
	si-NC-2	16.2023	19.5614	3.35909	0.176659	0.884749	1.02797
	si-NC-3	15.7593	19.4619	3.7026	0.520172	0.697289	0.810161
	si-circ-0007905-1	15.0393	20.5599	5.52062	2.33819	0.197759	0.22977
	si-circ-0007905-2	15.154	20.8461	5.6921	2.50966	0.175597	0.204021
	si-circ-0007905-3	15.0409	20.5987	5.55786	2.37543	0.19272	0.223916
	si-NC					0.860679
	si-circ-0007905					0.188692
	si-circ-0007905/si-NC					0.219236
	p value					0.0016114
	Sample Name	Actin	ARRB1	Delta Ct	Delta Delta Ct	RQ（2-Delta Delta Ct）
	si-NC-1	16.1249	22.8181	6.69312	0	1	1.1787
	si-NC-2	16.2023	23.0903	6.88795	0.194832	0.873675	1.0298
	si-NC-3	15.7593	23.0269	7.26767	0.574554	0.671494	0.791492
	si-circ-0007905-1	15.0393	23.884	8.84467	2.15155	0.22507	0.265291
	si-circ-0007905-2	15.154	23.6449	8.49088	1.79776	0.287621	0.33902
	si-circ-0007905-3	15.0409	23.7814	8.74058	2.04746	0.24191	0.28514
	si-NC					0.848389
	si-circ-0007905					0.251533
	si-circ-0007905/si-NC					0.296484
	p value					0.00360392
	Sample Name	Actin	ARRB2	Delta Ct	Delta Delta Ct	RQ（2-Delta Delta Ct）
	si-NC-1	16.1249	21.5378	5.41281	0	1	1.0814
	si-NC-2	16.2023	21.6376	5.43529	0.02248	0.984539	1.06468
	si-NC-3	15.7593	21.5128	5.75355	0.340734	0.789639	0.853917
	si-circ-0007905-1	15.0393	22.4178	7.37847	1.96566	0.256022	0.276862
	si-circ-0007905-2	15.154	22.3657	7.21169	1.79887	0.287399	0.310793
	si-circ-0007905-3	15.0409	22.5268	7.48592	2.07311	0.237647	0.256992
	si-NC					0.924726
	si-circ-0007905					0.260356
	si-circ-0007905/si-NC					0.281549
	p value					0.000659055
	Sample Name	Actin	EIF4EBP1	Delta Ct	Delta Delta Ct	RQ（2-Delta Delta Ct）
	si-NC-1	16.1249	18.259	2.13405	0	1	1.11882
	si-NC-2	16.2023	18.3754	2.17307	0.0390167	0.973318	1.08896
	si-NC-3	15.7593	18.3913	2.63205	0.497997	0.708089	0.792221
	si-circ-0007905-1	15.0393	19.7205	4.68117	2.54712	0.171096	0.191425
	si-circ-0007905-2	15.154	19.7267	4.57273	2.43868	0.184452	0.206368
	si-circ-0007905-3	15.0409	19.6826	4.64173	2.50768	0.175838	0.19673
	si-NC					0.893802
	si-circ-0007905					0.177129
	si-circ-0007905/si-NC					0.198174
	p value					0.00154206
	Sample Name	Actin	FRAT1	Delta Ct	Delta Delta Ct	RQ（2-Delta Delta Ct）
	si-NC-1	16.1249	25.5909	9.46599	0	1	1.16017
	si-NC-2	16.2023	25.803	9.60062	0.134628	0.910904	1.0568
	si-NC-3	15.7593	25.7924	10.0332	0.567183	0.674934	0.783035
	si-circ-0007905-1	15.0393	26.7245	11.6852	2.21924	0.214754	0.24915
	si-circ-0007905-2	15.154	26.7032	11.5492	2.08317	0.235995	0.273793
	si-circ-0007905-3	15.0409	26.7962	11.7553	2.28933	0.204571	0.237336
	si-NC					0.861946
	si-circ-0007905					0.21844
	si-circ-0007905/si-NC					0.253426
	p value					0.00272222
	Sample Name	Actin	PDGFD	Delta Ct	Delta Delta Ct	RQ（2-Delta Delta Ct）
	si-NC-1	16.1249	21.7551	5.63016	0	1	1.11705
	si-NC-2	16.2023	21.8177	5.6154	-0.0147572	1.01028	1.12853
	si-NC-3	15.7593	21.9557	6.19641	0.566254	0.675368	0.754419
	si-circ-0007905-1	15.0393	22.5365	7.49719	1.86703	0.274137	0.306224
	si-circ-0007905-2	15.154	22.5311	7.37705	1.74689	0.297943	0.332817
	si-circ-0007905-3	15.0409	22.3527	7.3118	1.68165	0.311726	0.348213
	si-NC					0.895217
	si-circ-0007905					0.294602
	si-circ-0007905/si-NC					0.329085
	p value					0.00556182
