# Supplementary material for: METTL3-mediated m6A modification of has_circ_0007905 promotes age-related cataract progression through miR-6749-3p/EIF4EBP1
Source: PeerJ journal article supplement (doi:10.7717/peerj.14863), 2023-03-06
Supplement: Raw_data.zip [file Corrected data.xls]

## Sheet: Sheet4
	Sample Name	Actin	hsa-circ-0035228	Delta Ct	Delta Delta Ct	RQ（2-Delta Delta Ct）
	HLE-B3 NC-1	14.7166	24.6942	9.97761	0	1	1.01268
	HLE-B3 NC-2	14.7127	24.7648	10.0521	0.074537	0.949647	0.961686
	HLE-B3 NC-3	14.6176	24.5769	9.95927	-0.0183453	1.0128	1.02564
	HLE-B3 UVB-1	14.6982	24.4971	9.79893	-0.178685	1.13185	1.1462
	HLE-B3 UVB-2	14.7158	24.579	9.86328	-0.114333	1.08247	1.0962
	HLE-B3 UVB-3	14.8151	24.5864	9.7713	-0.206314	1.15374	1.16836
	HLE-B3 NC					0.987481
	HLE-B3 UVB					1.12269
	HLE-B3 UVB/HLE-B3 NC					1.13692
	p value					0.00907704
	Sample Name	Actin	METTL3	Delta Ct	Delta Delta Ct	RQ（2-Delta Delta Ct）
	HLE-B3 NC-1	14.7166	23.0171	8.30054	0	1	1.08626
	HLE-B3 NC-2	14.7127	23.1316	8.41893	0.118391	0.921215	1.00068
	HLE-B3 NC-3	14.6176	23.1687	8.55112	0.250584	0.840556	0.913062
	HLE-B3 UVB-1	14.6982	22.8303	8.13207	-0.168471	1.12387	1.22081
	HLE-B3 UVB-2	14.7158	22.7983	8.08255	-0.217988	1.16311	1.26344
	HLE-B3 UVB-3	14.8151	22.8621	8.04698	-0.253558	1.19214	1.29498
	HLE-B3 NC					0.92059
	HLE-B3 UVB					1.15971
	HLE-B3 UVB/HLE-B3 NC					1.25974
	p value					0.00882194
	Sample Name	Actin	hsa-circ-0007905	Delta Ct	Delta Delta Ct	RQ（2-Delta Delta Ct）
	HLE-B3 NC-1	14.8858	25.0151	10.1293	0	1	1.01008
	HLE-B3 NC-2	15.0019	25.1657	10.1638	0.0344655	0.976393	0.98624
	HLE-B3 NC-3	14.9129	25.0514	10.1385	0.00918166	0.993656	1.00368
	HLE-B3 紫外-1	15.2265	24.8519	9.62541	-0.503874	1.41802	1.43232
	HLE-B3 紫外-2	15.1572	24.9209	9.76369	-0.365602	1.28842	1.30141
	HLE-B3 紫外-3	15.0734	24.8783	9.805	-0.324293	1.25205	1.26468
	HLE-B3 NC					0.990016
	HLE-B3 紫外					1.3195
	HLE-B3 紫外/HLE-B3 NC					1.3328
	p value					0.00292596
