# Supplementary material for: METTL3-mediated m6A modification of has_circ_0007905 promotes age-related cataract progression through miR-6749-3p/EIF4EBP1
Source: PeerJ journal article supplement (doi:10.7717/peerj.14863), 2023-03-06
Supplement: Raw_data.zip [file Corrected data.xls]

## Sheet: Sheet3
	Sample Name	Actin	hsa-circ-0007905	Delta Ct	Delta Delta Ct	RQ（2-Delta Delta Ct）
	si-NC-1	14.6998	25.0775	10.3777	0	1
	si-NC-2	15.0377	25.1841	10.1464	-0.231276	1.17387
	si-NC-3	14.8849	25.0421	10.1572	-0.220468	1.16511
	si-circ-0007905-1-1	14.295	26.9213	12.6263	2.24867	0.210418
	si-circ-0007905-1-2	14.3764	26.8945	12.518	2.14033	0.226827
	si-circ-0007905-1-3	14.5011	27.233	12.7319	2.35422	0.195573
	si-circ-0007905-2-1	14.5418	25.877	11.3352	0.957521	0.514941
	si-circ-0007905-2-2	14.6335	26.1939	11.5603	1.18265	0.440542
	si-circ-0007905-2-3	14.6131	26.3667	11.7536	1.37588	0.385317
	si-NC					1.11299
	si-circ-0007905-1					0.21094
	si-circ-0007905-2					0.446933	p value
	si-circ-0007905-1/si-NC					0.189524	9.4915e-05
	si-circ-0007905-2/si-NC					0.401559	0.000605015
							0.001
							0.01
