# Supplementary material for: METTL3-mediated m6A modification of has_circ_0007905 promotes age-related cataract progression through miR-6749-3p/EIF4EBP1
Source: PeerJ journal article supplement (doi:10.7717/peerj.14863), 2023-03-06
Supplement: Raw_data.zip [file Corrected data.xlsx]

## Sheet: Sheet1
	Gene	Sample	input(Ct)	IP(Ct)	%( IP/Input)	Fold Enrichment	AVE	SD	N/N AVERAGE	AVE（N/N）	N SD
	circ0007905	NC	26.264	28.2649	0.004997	1	1	0	0.947737	1	0.0731808
		NC	26.2862	28.0938	0.00571354	1			1.08364
		NC	26.0802	28.0496	0.00510714	1			0.968626
	circ0007905	UVB	32.4177	28.4115	0.321375	64.3135	47.5357	14.7336	1.29161	1	0.271907
		UVB	32.3723	28.8018	0.23761	41.5871			0.95496
		UVB	31.9552	28.7266	0.187465	36.7064			0.753425
