# Supplementary material for: METTL3-mediated m6A modification of has_circ_0007905 promotes age-related cataract progression through miR-6749-3p/EIF4EBP1
Source: PeerJ journal article supplement (doi:10.7717/peerj.14863), 2023-03-06
Supplement: Raw_data.zip [file Corrected data.xlsx]

## Sheet: Sheet1
	Gene	Sample	input(Ct)	IP(Ct)	%( IP/Input)	Fold Enrichment	AVE	SD	N/N average	AVE（N/N）	N SD
	circ0007905	NC	Undetermined	29.8432	22.832	1	1	0	1.84016	1	0.754686
		NC	Undetermined	31.0809	9.68163	1			0.780298
		NC	Undetermined	32.1207	4.70923	1			0.379543
		si-METTL3	Undetermined	31.9379	5.34528	0.234114	0.278561	0.0695999	1.70858	1	0.622678
		si-METTL3	Undetermined	33.1231	2.35067	0.242797			0.751374
		si-METTL3	Undetermined	33.5995	1.68953	0.358771			0.540047
