# Supplementary material for: METTL3-mediated m6A modification of has_circ_0007905 promotes age-related cataract progression through miR-6749-3p/EIF4EBP1
Source: PeerJ journal article supplement (doi:10.7717/peerj.14863), 2023-03-06
Supplement: Raw_data.zip [file Corrected data.xlsx]

## Sheet: circRNA
	Sample Name	Actin	hsa-circ-0003949	Delta Ct	Delta Delta Ct	RQ（2-Delta Delta Ct）
正常组	1	19.1105	25.9309	6.82038	0	1	0.582318
		19.1425	26.171	7.02851	0.20813	0.865659	0.504088
		19.2454	25.8204	6.57501	-0.245367	1.18539	0.690276
	2	19.7734	25.3705	5.59705	-1.22333	2.33484	1.35962
		19.8127	25.5241	5.71146	-1.10892	2.15684	1.25596
		19.9014	25.2566	5.35523	-1.46515	2.76092	1.60773
白内障组	1	20.5413	27.1544	6.61303	-0.207348	1.15456	0.672323
		20.8562	27.5892	6.73295	-0.0874252	1.06247	0.618696
		20.8609	27.4594	6.59851	-0.221869	1.16624	0.679124
	2	19.509	27.2158	7.70675	0.886372	0.540973	0.315018
		19.2292	27.163	7.93383	1.11345	0.462188	0.26914
		19.4264	27.2223	7.79591	0.975527	0.508554	0.29614
	3	20.7746	30.3784	9.60384	2.78346	0.145243	0.0845777
		20.5503	29.5095	8.95923	2.13885	0.22706	0.132221
		20.7205	29.9451	9.22458	2.4042	0.188913	0.110008
	4	19.2231	27.3803	8.15713	1.33675	0.395911	0.230546
		19.1931	27.1224	7.92937	1.10899	0.463619	0.269974
		19.1939	27.1648	7.9709	1.15052	0.450462	0.262312
	5	19.6098	26.9914	7.38156	0.56118	0.677748	0.394664
		19.3135	27.6925	8.37892	1.55854	0.339495	0.197694
		19.3529	27.1133	7.76045	0.940067	0.521209	0.303509
	6	20.5166	26.7448	6.22822	-0.592157	1.5075	0.877844
		20.6262	27.5182	6.89197	0.0715942	0.951586	0.554125
		20.9529	26.8159	5.86294	-0.957436	1.94186	1.13078
	7	19.4217	27.7445	8.32287	1.50249	0.352943	0.205525
		19.4331	27.8623	8.42918	1.6088	0.32787	0.190924
		19.5901	28.0958	8.50567	1.68529	0.31094	0.181066
	8	19.8385	27.6856	7.84709	1.02671	0.490827	0.285817
		19.2972	27.5602	8.26303	1.44265	0.36789	0.214229
		19.3296	27.3242	7.99463	1.17425	0.443115	0.258034
	9	19.0855	25.7453	6.65981	-0.160566	1.11773	0.650872
		19.1326	25.5561	6.42351	-0.396872	1.31665	0.766708
		19.2118	25.529	6.31725	-0.50313	1.41729	0.82531
	10	19.1834	27.8094	8.62598	1.8056	0.286063	0.166579
		19.2182	27.2792	8.06102	1.24064	0.423186	0.246429
		19.1101	27.7735	8.66345	1.84307	0.278728	0.162308
	N					1.71728
	T					0.661294	Pvalue
	T/N					0.385083	0.0216435
	Sample Name	Actin	hsa-circ-0007905	Delta Ct	Delta Delta Ct	RQ（2-Delta Delta Ct）
正常组	1	19.1105	27.4665	8.35595	0	1	0.997437
		19.1425	28.0144	8.87193	0.51598	0.699318	0.697526
		19.2454	27.4487	8.20327	-0.152678	1.11163	1.10878
	2	19.7734	27.9096	8.13614	-0.219809	1.16458	1.16159
		19.8127	27.9284	8.11575	-0.240192	1.18115	1.17812
		19.9014	28.477	8.57565	0.219707	0.85874	0.856539
白内障组	1	20.5413	25.7558	5.21448	-3.14146	8.82418	8.80156
		20.8562	25.9674	5.11119	-3.24476	9.47917	9.45487
		20.8609	25.7112	4.85028	-3.50567	11.3583	11.3292
	2	19.509	27.601	8.09194	-0.264009	1.20081	1.19773
		19.2292	27.8564	8.62717	0.271225	0.828616	0.826492
		19.4264	28.1143	8.68794	0.331991	0.794439	0.792403
	3	20.7746	27.407	6.63237	-1.72357	3.30253	3.29407
		20.5503	27.8988	7.34855	-1.00739	2.01028	2.00513
		20.7205	27.7683	7.04778	-1.30817	2.47627	2.46992
	4	19.2231	27.1446	7.92142	-0.434528	1.35147	1.34801
		19.1931	26.5943	7.40124	-0.954708	1.93819	1.93322
		19.1939	27.2752	8.08124	-0.274704	1.20975	1.20665
	5	19.6098	26.7785	7.1687	-1.18724	2.27717	2.27133
		19.3135	26.9195	7.60593	-0.750015	1.68181	1.6775
		19.3529	26.8457	7.49282	-0.863121	1.81897	1.81431
	6	20.5166	27.4998	6.98325	-1.3727	2.58954	2.5829
		20.6262	26.6996	6.07345	-2.28249	4.86518	4.85271
		20.9529	27.4496	6.49665	-1.8593	3.62831	3.61901
	7	19.4217	27.7637	8.34206	-0.0138817	1.00967	1.00708
		19.4331	27.4541	8.021	-0.334948	1.26133	1.2581
		19.5901	27.2686	7.67851	-0.677433	1.59929	1.59519
	8	19.8385	27.2867	7.44826	-0.907686	1.87603	1.87123
		19.2972	27.2392	7.94199	-0.413956	1.33233	1.32892
		19.3296	27.3491	8.01951	-0.336435	1.26263	1.2594
	9	19.0855	25.8068	6.72134	-1.63461	3.10503	3.09708
		19.1326	26.0033	6.87062	-1.48532	2.7998	2.79263
		19.2118	26.1742	6.96239	-1.39356	2.62726	2.62052
	10	19.1834	27.0985	7.91503	-0.440918	1.35747	1.35399
		19.2182	26.9252	7.70701	-0.648932	1.56801	1.56399
		19.1101	27.8142	8.70411	0.348166	0.785582	0.783569
	N					1.00257
	T					2.74065	Pvalue
	T/N					2.73362	0.00114175
	Sample Name	Actin	hsa-circ-0022997	Delta Ct	Delta Delta Ct	RQ（2-Delta Delta Ct）
正常组	1	19.1105	27.7973	8.68675	0	1	1.02556
		19.1425	27.7422	8.59977	-0.0869827	1.06215	1.08929
		19.2454	27.5178	8.27236	-0.414389	1.33273	1.3668
	2	19.7734	28.4693	8.69587	0.00911903	0.993699	1.0191
		19.8127	29.4135	9.60081	0.914061	0.530689	0.544253
		19.9014	28.691	8.78959	0.102833	0.931203	0.955003
白内障组	1	20.5413	28.9552	8.41383	-0.272926	1.20826	1.23914
		20.8562	28.7288	7.87257	-0.814182	1.7583	1.80324
		20.8609	29.551	8.69003	0.00327873	0.99773	1.02323
	2	19.509	28.7074	9.1984	0.511646	0.701422	0.719349
		19.2292	28.7662	9.53698	0.850231	0.554696	0.568873
		19.4264	28.6776	9.2512	0.564449	0.676213	0.693496
	3	20.7746	30.41	9.63539	0.948641	0.51812	0.531363
		20.5503	30.2108	9.66059	0.973843	0.509148	0.522161
		20.7205	30.6582	9.93764	1.25089	0.420188	0.430927
	4	19.2231	28.8359	9.61276	0.926008	0.526313	0.539764
		19.1931	29.3032	10.1102	1.4234	0.372831	0.38236
		19.1939	29.4014	10.2074	1.52068	0.348522	0.357429
	5	19.6098	30.3407	10.7308	2.04406	0.24248	0.248677
		19.3135	30.7129	11.3993	2.71257	0.152558	0.156457
		19.3529	30.6654	11.3125	2.62575	0.16202	0.166161
	6	20.5166	30.9435	10.427	1.74021	0.299326	0.306977
		20.6262	30.5997	9.97355	1.2868	0.40986	0.420335
		20.9529	30.7162	9.76331	1.07656	0.474158	0.486276
	7	19.4217	29.5554	10.1337	1.44696	0.366793	0.376168
		19.4331	29.1863	9.75317	1.06642	0.477503	0.489707
		19.5901	29.6618	10.0717	1.38491	0.382912	0.392699
	8	19.8385	29.2309	9.3924	0.705647	0.613168	0.628839
		19.2972	28.828	9.53077	0.844013	0.557092	0.57133
		19.3296	28.6315	9.30194	0.615183	0.652847	0.669533
	9	19.0855	27.669	8.58357	-0.103178	1.07414	1.10159
		19.1326	27.8642	8.73157	0.0448208	0.96941	0.994187
		19.2118	28.2313	9.01957	0.332821	0.793982	0.814275
	10	19.1834	28.2222	9.03881	0.352053	0.783469	0.803493
		19.2182	28.5044	9.28613	0.599373	0.660041	0.67691
		19.1101	28.4894	9.37936	0.692606	0.618735	0.634549
	N					0.975079
	T					0.609408	Pvalue
	T/N					0.624983	0.0156729
	Sample Name	Actin	hsa-circ-0035228	Delta Ct	Delta Delta Ct	RQ（2-Delta Delta Ct）
正常组	1	19.1105	25.8732	6.76268	0	1	1.02351
		19.1425	25.9267	6.78424	0.021553	0.985172	1.00833
		19.2454	26.1008	6.85544	0.0927563	0.93773	0.959777
	2	19.7734	26.8707	7.0973	0.334614	0.792996	0.811641
		19.8127	26.838	7.02534	0.262653	0.833553	0.853151
		19.9014	26.2715	6.37012	-0.392561	1.31272	1.34359
白内障组	1	20.5413	28.3339	7.79254	1.02986	0.489758	0.501273
		20.8562	28.4241	7.56792	0.805236	0.572268	0.585723
		20.8609	28.6518	7.7909	1.02821	0.490317	0.501845
	2	19.509	26.4915	6.98247	0.219788	0.858692	0.878881
		19.2292	26.759	7.52981	0.767122	0.587588	0.601403
		19.4264	26.9111	7.48466	0.721975	0.606267	0.620521
	3	20.7746	27.8047	7.0301	0.267416	0.830806	0.85034
		20.5503	27.8655	7.31522	0.552536	0.681821	0.697851
		20.7205	27.73	7.0095	0.246813	0.842756	0.86257
	4	19.2231	27.8411	8.61795	1.85526	0.276382	0.28288
		19.1931	27.4167	8.22368	1.461	0.363242	0.371782
		19.1939	28.2185	9.0246	2.26191	0.208496	0.213398
	5	19.6098	27.2266	7.61677	0.854082	0.553217	0.566224
		19.3135	26.8442	7.53063	0.76795	0.587251	0.601058
		19.3529	26.7493	7.39647	0.633789	0.644482	0.659634
	6	20.5166	28.3067	7.79011	1.02743	0.490583	0.502117
		20.6262	28.0096	7.38338	0.620699	0.650356	0.665647
		20.9529	28.5709	7.61796	0.85528	0.552758	0.565754
	7	19.4217	27.7365	8.31486	1.55218	0.340995	0.349012
		19.4331	28.3471	8.91403	2.15134	0.225103	0.230396
		19.5901	27.9717	8.38158	1.6189	0.325584	0.333239
	8	19.8385	26.742	6.90353	0.14085	0.906985	0.928309
		19.2972	26.3243	7.02709	0.26441	0.832539	0.852113
		19.3296	27.0188	7.68924	0.926552	0.526114	0.538484
	9	19.0855	26.6761	7.59068	0.827997	0.563311	0.576555
		19.1326	26.3191	7.18644	0.423754	0.745482	0.76301
		19.2118	26.6045	7.39269	0.630003	0.646175	0.661368
	10	19.1834	26.8726	7.68917	0.926481	0.52614	0.53851
		19.2182	26.9989	7.78066	1.01797	0.49381	0.50542
		19.1101	26.1437	7.03364	0.27096	0.828768	0.848253
	N					0.977029
	T					0.574935	Pvalue
	T/N					0.588452	0.00162126
	Sample Name	Actin	hsa-circ-0065244	Delta Ct	Delta Delta Ct	RQ（2-Delta Delta Ct）
正常组	1	19.1105	25.5206	6.41002	0	1	0.707475
		19.1425	24.8814	5.73896	-0.671059	1.59224	1.12647
		19.2454	25.2659	6.02047	-0.389549	1.30998	0.926781
	2	19.7734	25.9061	6.13266	-0.277357	1.21197	0.85744
		19.8127	25.5676	5.75496	-0.655052	1.57467	1.11404
		19.9014	25.4698	5.56845	-0.841568	1.792	1.26779
白内障组	1	20.5413	26.9438	6.40246	-0.00755692	1.00525	0.71119
		20.8562	26.9841	6.12786	-0.28216	1.21601	0.860299
		20.8609	27.419	6.55811	0.148092	0.902443	0.638456
	2	19.509	25.7122	6.2032	-0.206816	1.15414	0.816524
		19.2292	25.5634	6.33417	-0.0758476	1.05398	0.745664
		19.4264	25.7199	6.29354	-0.11648	1.08409	0.766964
	3	20.7746	27.8453	7.07073	0.660717	0.632564	0.447523
		20.5503	27.5083	6.95807	0.548058	0.68394	0.483871
		20.7205	27.2003	6.47978	0.0697613	0.952796	0.674079
	4	19.2231	25.9359	6.71278	0.302765	0.810697	0.573548
		19.1931	25.5493	6.35625	-0.0537643	1.03797	0.734337
		19.1939	26.3225	7.12859	0.718575	0.607698	0.429931
	5	19.6098	25.8542	6.24432	-0.165693	1.1217	0.793578
		19.3135	25.9184	6.60486	0.194843	0.873668	0.618098
		19.3529	25.5119	6.15901	-0.251001	1.19003	0.841918
	6	20.5166	26.9931	6.47658	0.0665646	0.954909	0.675574
		20.6262	27.1904	6.56423	0.154211	0.898624	0.635754
		20.9529	27.3338	6.38086	-0.0291595	1.02042	0.72192
	7	19.4217	25.9934	6.57173	0.161715	0.893962	0.632456
		19.4331	25.9822	6.54908	0.139069	0.908105	0.642462
		19.5901	26.5112	6.9211	0.511087	0.701693	0.49643
	8	19.8385	25.4951	5.65668	-0.753338	1.68569	1.19258
		19.2972	25.6098	6.31257	-0.0974483	1.06988	0.756913
		19.3296	25.6046	6.27501	-0.135004	1.0981	0.776875
	9	19.0855	24.6493	5.56385	-0.846167	1.79772	1.27184
		19.1326	24.5863	5.45367	-0.956341	1.94038	1.37277
		19.2118	24.5089	5.29715	-1.11286	2.16274	1.53009
	10	19.1834	25.4098	6.22634	-0.183672	1.13577	0.803529
		19.2182	25.6948	6.47652	0.0665073	0.954947	0.675601
		19.1101	25.7572	6.64715	0.237131	0.848431	0.600243
	N					1.41348
	T					1.07995	Pvalue
	T/N					0.764034	0.0384396

## Sheet: m6A酶
	Sample Name	Actin	METTL3	Delta Ct	Delta Delta Ct	RQ（2-Delta Delta Ct）
正常组	1	19.1105	26.389	7.27844	0	1	0.711112
		19.1425	26.2107	7.06824	-0.210207	1.15685	0.822653
		19.2454	26.2901	7.04472	-0.233721	1.17586	0.836171
	2	19.7734	26.2895	6.51604	-0.762407	1.69632	1.20627
		19.8127	26.2842	6.47149	-0.806959	1.74952	1.24411
		19.9014	26.4496	6.54819	-0.730253	1.65893	1.17969
白内障组	1	20.5413	24.6794	4.13801	-3.14044	8.81791	6.27052
		20.8562	24.6087	3.75248	-3.52596	11.5191	8.1914
		20.8609	24.7553	3.89433	-3.38412	10.4405	7.42435
	2	19.509	25.2348	5.72573	-1.55271	2.93368	2.08618
		19.2292	24.9342	5.70504	-1.5734	2.97606	2.11631
		19.4264	24.7726	5.3462	-1.93224	3.81648	2.71395
	3	20.7746	25.8597	5.08513	-2.19331	4.57355	3.25231
		20.5503	25.6604	5.11012	-2.16832	4.495	3.19645
		20.7205	25.2758	4.55525	-2.7232	6.60335	4.69572
	4	19.2231	24.7541	5.53097	-1.74748	3.35771	2.38771
		19.1931	24.8631	5.67007	-1.60838	3.04909	2.16824
		19.1939	24.7572	5.56332	-1.71513	3.28326	2.33476
	5	19.6098	24.9416	5.33181	-1.94663	3.85473	2.74115
		19.3135	24.7776	5.46407	-1.81437	3.51706	2.50103
		19.3529	25.1181	5.76518	-1.51327	2.85455	2.02991
	6	20.5166	24.7755	4.25891	-3.01954	8.10908	5.76647
		20.6262	24.8722	4.24603	-3.03242	8.18179	5.81817
		20.9529	24.8502	3.89722	-3.38122	10.4196	7.40948
	7	19.4217	25.2393	5.81762	-1.46083	2.75266	1.95745
		19.4331	25.1315	5.6984	-1.58005	2.98979	2.12608
		19.5901	24.7801	5.18993	-2.08852	4.25311	3.02444
	8	19.8385	25.706	5.86749	-1.41095	2.65912	1.89093
		19.2972	25.6167	6.31951	-0.958935	1.94387	1.38231
		19.3296	25.5023	6.17274	-1.10571	2.15204	1.53034
	9	19.0855	24.9092	5.82375	-1.45469	2.74099	1.94915
		19.1326	24.6271	5.49443	-1.78402	3.44384	2.44896
		19.2118	24.686	5.47428	-1.80417	3.49227	2.4834
	10	19.1834	25.0123	5.82891	-1.44954	2.73121	1.9422
		19.2182	24.6021	5.3839	-1.89454	3.71804	2.64394
		19.1101	25.2944	6.18436	-1.09409	2.13478	1.51807
	N					1.40625
	T					4.59381	Pvalue
	T/N					3.26671	6.90355e-07
	Sample Name	Actin	METT14	Delta Ct	Delta Delta Ct	RQ（2-Delta Delta Ct）
正常组	1	19.1105	25.343	6.23247	0	1	0.7267
		19.1425	25.2589	6.1164	-0.116074	1.08378	0.787584
		19.2454	24.9145	5.66907	-0.563396	1.47774	1.07388
	2	19.7734	25.401	5.62757	-0.604898	1.52087	1.10522
		19.8127	25.2353	5.42266	-0.809813	1.75298	1.27389
		19.9014	25.6268	5.72544	-0.507029	1.42112	1.03273
白内障组	1	20.5413	26.2628	5.72146	-0.511013	1.42505	1.03558
		20.8562	26.3541	5.49784	-0.734629	1.66397	1.20921
		20.8609	26.1841	5.32316	-0.909306	1.87814	1.36485
	2	19.509	26.3154	6.80633	0.573858	0.671818	0.48821
		19.2292	25.5263	6.29706	0.0645905	0.956217	0.694883
		19.4264	26.3697	6.94325	0.710779	0.61099	0.444007
	3	20.7746	26.8435	6.06895	-0.163517	1.12001	0.813914
		20.5503	26.9495	6.39928	0.166807	0.890812	0.647353
		20.7205	26.8503	6.1298	-0.102671	1.07376	0.780301
	4	19.2231	25.465	6.2419	0.00943184	0.993484	0.721965
		19.1931	25.4522	6.25918	0.0267067	0.981659	0.713371
		19.1939	24.8506	5.65667	-0.575804	1.49051	1.08315
	5	19.6098	25.8115	6.2017	-0.0307713	1.02156	0.742366
		19.3135	25.6776	6.36408	0.131609	0.912813	0.663341
		19.3529	25.3599	6.00701	-0.225458	1.16915	0.84962
	6	20.5166	27.1653	6.64878	0.416306	0.749341	0.544546
		20.6262	26.7215	6.0953	-0.137169	1.09974	0.799185
		20.9529	26.7724	5.8195	-0.41297	1.33142	0.967546
	7	19.4217	25.2684	5.84675	-0.385723	1.30651	0.949444
		19.4331	25.8203	6.38722	0.154755	0.898285	0.652784
		19.5901	25.1751	5.58492	-0.647545	1.5665	1.13838
	8	19.8385	26.0931	6.2546	0.0221348	0.984774	0.715636
		19.2972	25.9836	6.68644	0.45397	0.730031	0.530514
		19.3296	25.9829	6.6533	0.420826	0.746997	0.542843
	9	19.0855	24.8276	5.74211	-0.490356	1.40479	1.02086
		19.1326	25.2317	6.0991	-0.133368	1.09685	0.797082
		19.2118	25.3286	6.11687	-0.115597	1.08342	0.787324
	10	19.1834	24.8692	5.68573	-0.546743	1.46078	1.06155
		19.2182	25.6649	6.44668	0.214211	0.862018	0.626428
		19.1101	25.2677	6.15767	-0.0747986	1.05321	0.765371
	N					1.37608
	T					1.10782	Pvalue
	T/N					0.805054	0.0727518
	Sample Name	Actin	FTO	Delta Ct	Delta Delta Ct	RQ（2-Delta Delta Ct）
正常组	1	19.1105	22.9195	3.80897	0	1	0.963953
		19.1425	22.9651	3.82264	0.0136719	0.990568	0.954861
		19.2454	23.1806	3.93521	0.126244	0.916214	0.883187
	2	19.7734	23.6252	3.85172	0.0427494	0.970803	0.935808
		19.8127	23.5453	3.73258	-0.0763874	1.05437	1.01637	WTA
		19.9014	23.3403	3.4389	-0.370068	1.29241	1.24583
白内障组	1	20.5413	24.5631	4.02172	0.212753	0.862889	0.831784
		20.8562	24.3413	3.48514	-0.32383	1.25165	1.20653
		20.8609	24.59	3.72903	-0.0799351	1.05697	1.01887
	2	19.509	23.4179	3.90882	0.0998535	0.933128	0.899491
		19.2292	23.1205	3.89129	0.0823269	0.944533	0.910485
		19.4264	23.1886	3.76222	-0.0467491	1.03293	0.9957
	3	20.7746	24.9956	4.22104	0.412071	0.751544	0.724452
		20.5503	25.0205	4.47025	0.661289	0.632313	0.60952
		20.7205	25.314	4.59346	0.784498	0.580554	0.559626
	4	19.2231	22.9351	3.71191	-0.0970573	1.06959	1.03103
		19.1931	23.5684	4.3753	0.566334	0.675331	0.650987
		19.1939	23.3772	4.1833	0.374338	0.771459	0.74365
	5	19.6098	23.5044	3.89459	0.0856266	0.942375	0.908405
		19.3135	23.6098	4.29624	0.487272	0.713373	0.687657
		19.3529	23.4817	4.12884	0.319876	0.801139	0.77226
	6	20.5166	23.5756	3.05899	-0.749975	1.68176	1.62114
		20.6262	23.8948	3.26864	-0.540321	1.4543	1.40187
		20.9529	23.6565	2.70359	-1.10538	2.15155	2.07399
	7	19.4217	23.7888	4.36713	0.558168	0.679164	0.654682
		19.4331	23.6372	4.20412	0.395159	0.760406	0.732995
		19.5901	23.4953	3.90513	0.0961647	0.935517	0.901794
	8	19.8385	24.0231	4.18462	0.375658	0.770754	0.74297
		19.2972	23.7649	4.46768	0.658712	0.633443	0.610609
		19.3296	23.2969	3.96726	0.158293	0.896085	0.863783
	9	19.0855	22.8484	3.76297	-0.0459976	1.0324	0.995182
		19.1326	22.7999	3.66727	-0.141691	1.1032	1.06343
		19.2118	23.1883	3.97655	0.167585	0.890332	0.858237
	10	19.1834	23.7012	4.51782	0.708851	0.611807	0.589753
		19.2182	23.4352	4.21696	0.407997	0.753669	0.726501
		19.1101	23.6502	4.54009	0.731123	0.602435	0.580719
	N					1.0374
	T					0.932553	Pvalue
	T/N					0.898937	0.217969
	Sample Name	Actin	WTAP	Delta Ct	Delta Delta Ct	RQ（2-Delta Delta Ct）
正常组	1	19.4098	21.4701	2.06033	0	1	1.03636
		19.2602	21.5047	2.24453	0.184204	0.880134	0.912135
		19.3342	21.5392	2.20509	0.144758	0.904531	0.937418
	2	20.2142	22.2979	2.08367	0.023344	0.983949	1.01972
		20.016	22.1584	2.14237	0.0820408	0.94472	0.979069
		19.9239	21.8783	1.95443	-0.105902	1.07617	1.11529
白内障组	1	20.8335	22.6391	1.80565	-0.254683	1.19307	1.23645
		20.7861	22.5989	1.81282	-0.247509	1.18716	1.23032
		20.9173	22.7142	1.7969	-0.263433	1.20033	1.24397
	2	19.4336	22.2668	2.83318	0.772848	0.585261	0.60654
		19.4976	22.2531	2.75545	0.695124	0.617656	0.640113
		19.428	22.2306	2.80263	0.742302	0.597785	0.619519
	3	20.9751	23.3464	2.37131	0.310978	0.806095	0.835404
		20.7165	23.2328	2.51631	0.455982	0.729014	0.75552
		20.6974	23.4108	2.71338	0.653053	0.635933	0.659055
	4	19.4939	21.7445	2.25057	0.190237	0.876462	0.908329
		19.2558	21.83	2.57416	0.513826	0.700362	0.725827
		19.003	21.9034	2.90038	0.84005	0.558624	0.578935
	5	19.4426	22.2267	2.78407	0.723738	0.605527	0.627543
		19.0231	22.2248	3.20171	1.14138	0.453326	0.469809
		19.3264	22.2507	2.92425	0.863918	0.549458	0.569436
	6	20.6539	22.2938	1.63994	-0.420385	1.33828	1.38694
		20.6889	22.6918	2.00297	-0.0573578	1.04056	1.07839
		20.6118	22.7927	2.18093	0.120605	0.919802	0.953244
	7	19.4398	22.3017	2.86189	0.801558	0.573729	0.594589
		19.7828	21.7625	1.97962	-0.0807114	1.05754	1.09599
		19.6132	22.0308	2.41759	0.357256	0.780648	0.809031
	8	19.4433	21.8338	2.39049	0.330156	0.79545	0.824372
		19.4637	21.9601	2.49639	0.436062	0.73915	0.766024
		19.343	22.2294	2.8864	0.826067	0.564065	0.584573
	9	19.3946	21.3622	1.96763	-0.0927029	1.06637	1.10514
		19.3189	21.2316	1.91268	-0.147652	1.10776	1.14804
		19.2176	21.3855	2.16792	0.107594	0.928135	0.961881
	10	19.187	21.67	2.48302	0.422693	0.746031	0.773155
		18.6351	21.604	2.96884	0.908514	0.532734	0.552103
		18.8428	21.7227	2.87994	0.819614	0.566593	0.587194
	N					0.964917
	T					0.801764	Pvalue
	T/N					0.830915	0.00487301
	Sample Name	Actin	ALKBH5	Delta Ct	Delta Delta Ct	RQ（2-Delta Delta Ct）
正常组	1	19.4098	20.2361	0.826332	0	1	1.37414
		19.2602	20.7182	1.45808	0.631744	0.645396	0.886865
		19.3342	20.9449	1.61071	0.784382	0.580601	0.797827
	2	20.2142	21.3748	1.16057	0.334236	0.793204	1.08997
		20.016	21.5259	1.50992	0.68359	0.622614	0.85556
		19.9239	21.2151	1.29118	0.464846	0.724549	0.995632
白内障组	1	20.8335	22.5427	1.70925	0.882915	0.54227	0.745156
		20.7861	22.4146	1.62853	0.802198	0.573475	0.788035
		20.9173	22.4034	1.48606	0.659731	0.632996	0.869826
	2	19.4336	21.1256	1.69202	0.865685	0.548786	0.75411
		19.4976	21.4439	1.94623	1.1199	0.460126	0.632278
		19.428	21.3132	1.88516	1.05883	0.480022	0.659619
	3	20.9751	23.2183	2.24311	1.41678	0.374547	0.51468
		20.7165	22.9703	2.2538	1.42747	0.371783	0.510883
		20.6974	23.1175	2.42008	1.59374	0.33131	0.455267
	4	19.4939	21.3032	1.80934	0.983006	0.505925	0.695212
		19.2558	21.3712	2.11543	1.28909	0.409208	0.562309
		19.003	21.4181	2.41509	1.58876	0.332457	0.456844
	5	19.4426	21.5462	2.10358	1.27724	0.412583	0.566947
		19.0231	21.339	2.31592	1.48959	0.356114	0.489351
		19.3264	21.5114	2.18501	1.35867	0.389941	0.535834
	6	20.6539	22.1599	1.506	0.67967	0.624308	0.857887
		20.6889	21.7772	1.08832	0.261986	0.833939	1.14595
		20.6118	21.6346	1.02281	0.196478	0.872678	1.19918
	7	19.4398	21.6349	2.19515	1.36882	0.387208	0.532079
		19.7828	21.3407	1.55785	0.731516	0.602271	0.827605
		19.6132	21.3394	1.72614	0.899811	0.535957	0.736481
	8	19.4433	21.6999	2.25666	1.43033	0.371046	0.50987
		19.4637	21.4624	1.99873	1.1724	0.443683	0.609684
		19.343	21.6781	2.3351	1.50877	0.351411	0.482889
	9	19.3946	21.2186	1.82405	0.997719	0.500791	0.688158
		19.3189	21.1633	1.84438	1.01804	0.493786	0.678531
		19.2176	21.3496	2.13202	1.30569	0.404527	0.555877
	10	19.187	21.1942	2.00723	1.1809	0.441077	0.606103
		18.6351	21.5291	2.89392	2.06759	0.238558	0.327812
		18.8428	21.6963	2.85348	2.02715	0.24534	0.337131
	N					0.727727
	T					0.468937	Pvalue
	T/N					0.644386	0.00685246
