# Supplementary material for: METTL3-mediated m6A modification of has_circ_0007905 promotes age-related cataract progression through miR-6749-3p/EIF4EBP1
Source: PeerJ journal article supplement (doi:10.7717/peerj.14863), 2023-03-06
Supplement: Raw_data.zip [file Corrected data.xlsx]

## Sheet: Sheet7
	Sample Name	U6	miR-4707-5P	Delta Ct	Delta Delta Ct	RQ（2-Delta Delta Ct）
	Si NC-1	9.45724	27.57	18.1127	0	1	0.947022
	Si NC-2	9.54766	27.3961	17.8485	-0.264244	1.20101	1.13738
	Si NC-3	9.64618	27.8076	18.1614	0.0486822	0.966819	0.915599
	Si circ7905-1	9.41389	27.7505	18.3366	0.223889	0.856254	0.810891
	Si circ7905-2	9.54257	27.5449	18.0023	-0.110388	1.07952	1.02233
	Si circ7905-3	9.44862	27.7738	18.3252	0.212424	0.863086	0.817361
	Si NC					1.05594
	Si circ7905					0.932953
	Si circ7905/NC					0.883527
	p value					0.300733
	Sample Name	U6	miR-6749-3P	Delta Ct	Delta Delta Ct	RQ（2-Delta Delta Ct）
	Si NC-1	9.45724	24.7318	15.2746	0	1	0.957513
	Si NC-2	9.54766	24.7248	15.1772	-0.0974407	1.06987	1.02442
	Si NC-3	9.64618	24.8323	15.1861	-0.0884695	1.06324	1.01807
	Si circ7905-1	9.41389	24.9547	15.5408	0.26618	0.831519	0.79619
	Si circ7905-2	9.54257	24.8671	15.3246	0.0499535	0.965967	0.924927
	Si circ7905-3	9.44862	24.9455	15.4968	0.222239	0.857234	0.820813
	Si NC					1.04437
	Si circ7905					0.884907
	Si circ7905/NC					0.84731
	p value					0.0271599
	Sample Name	U6	miR-4783-3P	Delta Ct	Delta Delta Ct	RQ（2-Delta Delta Ct）
	Si NC-1	9.45724	25.4249	15.9677	0	1	1.0159
	Si NC-2	9.54766	25.5714	16.0237	0.0560226	0.961912	0.977204
	Si NC-3	9.64618	25.6267	15.9805	0.0128374	0.991141	1.0069
	Si circ7905-1	9.41389	25.5001	16.0862	0.118474	0.921161	0.935806
	Si circ7905-2	9.54257	25.5225	15.98	0.0122623	0.991536	1.0073
	Si circ7905-3	9.44862	25.7236	16.275	0.307279	0.808165	0.821013
	Si NC					0.984351
	Si circ7905					0.906954
	Si circ7905/NC					0.921373
	p value					0.229545
	Sample Name	U6	miR-10396a-3P	Delta Ct	Delta Delta Ct	RQ（2-Delta Delta Ct）
	Si NC-1	9.45724	24.4789	15.0217	0	1	0.81421
	Si NC-2	9.54766	24.3789	14.8312	-0.19049	1.14115	0.929137
	Si NC-3	9.64618	24.0418	14.3956	-0.626112	1.5434	1.25665
	Si circ7905-1	9.41389	24.2524	14.8385	-0.183194	1.13539	0.92445
	Si circ7905-2	9.54257	24.2608	14.7182	-0.303486	1.23412	1.00484
	Si circ7905-3	9.44862	24.5232	15.0746	0.0529048	0.963993	0.784893
	Si NC					1.22818
	Si circ7905					1.11117
	Si circ7905/NC					0.904726
	p value					0.553
	Sample Name	U6	miR-10396b-3P	Delta Ct	Delta Delta Ct	RQ（2-Delta Delta Ct）
	Si NC-1	9.45724	24.183	14.7258	0	1	0.854555
	Si NC-2	9.54766	23.9147	14.367	-0.358741	1.28231	1.0958
	Si NC-3	9.64618	24.0753	14.4291	-0.296655	1.22829	1.04964
	Si circ7905-1	9.41389	24.0004	14.5865	-0.139285	1.10136	0.941172
	Si circ7905-2	9.54257	24.0514	14.5088	-0.216957	1.16228	0.993232
	Si circ7905-3	9.44862	24.0213	14.5727	-0.153066	1.11193	0.950205
	Si NC					1.1702
	Si circ7905					1.12519
	Si circ7905/NC					0.961536
	p value					0.637934
