# Supplementary material for: METTL3-mediated m6A modification of has_circ_0007905 promotes age-related cataract progression through miR-6749-3p/EIF4EBP1
Source: PeerJ journal article supplement (doi:10.7717/peerj.14863), 2023-03-06
Supplement: Raw_data.zip [file Fig 6F 6G luciferase raw data.xlsx]

## Sheet: raw data
No.	group	renilla	Firefly	ratio
1	psiCHECK-EIF4EBP1+hsa-miR-6749-3p	87444	164779	0.530674
2	psiCHECK-EIF4EBP1+hsa-miR-6749-3p	92527	175714	0.526577
3	psiCHECK-EIF4EBP1+hsa-miR-6749-3p	85887	164398	0.522433
4	psiCHECK-EIF4EBP1+NC	140100	152814	0.916801
5	psiCHECK-EIF4EBP1+NC	160419	149904	1.07014
6	psiCHECK-EIF4EBP1+NC	148790	154759	0.96143
7	psiCHECK-EIF4EBP1-mut+hsa-miR-6749-3p	171339	172156	0.995254
8	psiCHECK-EIF4EBP1-mut+hsa-miR-6749-3p	199016	178888	1.11252
9	psiCHECK-EIF4EBP1-mut+hsa-miR-6749-3p	145817	153855	0.947756
10	psiCHECK-EIF4EBP1-mut+NC	157215	160274	0.980914
11	psiCHECK-EIF4EBP1-mut+NC	180871	173827	1.04052
12	psiCHECK-EIF4EBP1-mut+NC	172063	175984	0.97772
13	psiCHECK-hsa-circ-0007905+hsa-miR-6749-3p	45479	122390	0.371591
14	psiCHECK-hsa-circ-0007905+hsa-miR-6749-3p	45566	130625	0.348831
15	psiCHECK-hsa-circ-0007905+hsa-miR-6749-3p	48912	136014	0.35961
16	psiCHECK-hsa-circ-0007905+NC	104047	135134	0.769954
17	psiCHECK-hsa-circ-0007905+NC	107703	140687	0.76555
18	psiCHECK-hsa-circ-0007905+NC	97895	116744	0.838544
19	psiCHECK-hsa-circ-0007905-mut+hsa-miR-6749-3p	108304	140440	0.771176
20	psiCHECK-hsa-circ-0007905-mut+hsa-miR-6749-3p	135981	152372	0.892428
21	psiCHECK-hsa-circ-0007905-mut+hsa-miR-6749-3p	132782	149139	0.890324
22	psiCHECK-hsa-circ-0007905-mut+NC	87002	123560	0.704128
23	psiCHECK-hsa-circ-0007905-mut+NC	100658	136112	0.739523
24	psiCHECK-hsa-circ-0007905-mut+NC	121850	142167	0.857091

## Sheet: analysis
group	ratio					hsa-miR-6749-3p		NC		hsa-miR-6749-3p/NC		NC/NC
psiCHECK-EIF4EBP1+hsa-miR-6749-3p	0.530674	0.526577	0.522433		gene	average	stdev	average	stdev	average	stdev	average	stdev	p
psiCHECK-EIF4EBP1+NC	0.916801	1.07014	0.96143		EIF4EBP1	0.526562	0.00412055	0.982792	0.0788723	0.535781	0.0041927	1	0.0802533	0.000560861
psiCHECK-EIF4EBP1-mut+hsa-miR-6749-3p	0.995254	1.11252	0.947756		EIF4EBP1-mut	1.01851	0.0848066	0.999719	0.0353735	1.03634	0.0862915	1.01722	0.0359929	0.741079
psiCHECK-EIF4EBP1-mut+NC	0.980914	1.04052	0.97772
						hsa-miR-6749-3p		NC		hsa-miR-6749-3p/NC		NC/NC
psiCHECK-hsa-circ-0007905+hsa-miR-6749-3p	0.371591	0.348831	0.35961		gene	average	stdev	average	stdev	average	stdev	average	stdev	p
psiCHECK-hsa-circ-0007905+NC	0.769954	0.76555	0.838544		hsa-circ-0007905	0.36001	0.0113854	0.79135	0.0409309	0.454932	0.0143873	1	0.0517229	6.14139e-05
psiCHECK-hsa-circ-0007905-mut+hsa-miR-6749-3p	0.771176	0.892428	0.890324		hsa-circ-0007905-mut	0.851309	0.0694052	0.766914	0.0800756	1.07577	0.0877048	0.969121	0.101189	0.239857
psiCHECK-hsa-circ-0007905-mut+NC	0.704128	0.739523	0.857091
