# Supplementary material for: METTL3-mediated m6A modification of has_circ_0007905 promotes age-related cataract progression through miR-6749-3p/EIF4EBP1
Source: PeerJ journal article supplement (doi:10.7717/peerj.14863), 2023-03-06
Supplement: Raw_data.zip [file Realtime PCR raw CT data 7905.xls]

## Sheet: Actin
Block Type	384-Well Block
Chemistry	SYBR_GREEN
Experiment Name	2021-11-29 141510 wangli
Experiment Run End Time	2021-11-30 00:40:11 AM CST
Experiment Type	Comparative Cт (ΔΔCт)
Instrument Type	QuantStudio(TM) 6 Flex System
Passive Reference	ROX
Quantification Cycle Method	Ct
Signal Smoothing On	true
Stage/ Cycle where Analysis is performed	Stage 2, Step 2
User Name
Well	Well Position	Sample Name	Target Name	Task	Reporter	Quencher	CT	Ct Mean	Ct SD	Tm1	Ct Threshold
221	J5		Actin	NTC	SYBR	None	Undetermined			61.257	0.1
244	K4	HLE-B3 NC-1	Actin	UNKNOWN	SYBR	None	14.899	14.8858	0.0577594	88.3292	0.1
245	K5	HLE-B3 NC-1	Actin	UNKNOWN	SYBR	None	14.9358	14.8858	0.0577594	88.3292	0.1
246	K6	HLE-B3 NC-1	Actin	UNKNOWN	SYBR	None	14.8226	14.8858	0.0577594	88.3292	0.1
268	L4	HLE-B3 NC-2	Actin	UNKNOWN	SYBR	None	15.1017	15.0019	0.0973859	88.3292	0.1
269	L5	HLE-B3 NC-2	Actin	UNKNOWN	SYBR	None	14.997	15.0019	0.0973859	88.3292	0.1
270	L6	HLE-B3 NC-2	Actin	UNKNOWN	SYBR	None	14.9071	15.0019	0.0973859	88.3292	0.1
292	M4	HLE-B3 NC-3	Actin	UNKNOWN	SYBR	None	14.8672	14.9129	0.0397498	88.3292	0.1
293	M5	HLE-B3 NC-3	Actin	UNKNOWN	SYBR	None	14.9331	14.9129	0.0397498	88.3292	0.1
294	M6	HLE-B3 NC-3	Actin	UNKNOWN	SYBR	None	14.9385	14.9129	0.0397498	88.3292	0.1
316	N4	HLE-B3 紫外-1	Actin	UNKNOWN	SYBR	None	15.1809	15.2265	0.0397281	87.8033	0.1
317	N5	HLE-B3 紫外-1	Actin	UNKNOWN	SYBR	None	15.2447	15.2265	0.0397281	88.1977	0.1
318	N6	HLE-B3 紫外-1	Actin	UNKNOWN	SYBR	None	15.2539	15.2265	0.0397281	88.1977	0.1
340	O4	HLE-B3 紫外-2	Actin	UNKNOWN	SYBR	None	15.1441	15.1572	0.247728	88.1977	0.1
341	O5	HLE-B3 紫外-2	Actin	UNKNOWN	SYBR	None	15.4112	15.1572	0.247728	88.1977	0.1
342	O6	HLE-B3 紫外-2	Actin	UNKNOWN	SYBR	None	14.9163	15.1572	0.247728	88.1977	0.1
364	P4	HLE-B3 紫外-3	Actin	UNKNOWN	SYBR	None	14.8862	15.0734	0.164921	88.1977	0.1
365	P5	HLE-B3 紫外-3	Actin	UNKNOWN	SYBR	None	15.1366	15.0734	0.164921	88.1977	0.1
366	P6	HLE-B3 紫外-3	Actin	UNKNOWN	SYBR	None	15.1973	15.0734	0.164921	88.1977	0.1
Analysis Type	Singleplex
Endogenous Control	Actin
RQ Min/Max Confidence Level	95.0
Reference Sample	HLE-B3 NC-1

## Sheet: hsa-circ-0007905
Block Type	384-Well Block
Chemistry	SYBR_GREEN
Experiment Name	2021-11-29 141510 wangli
Experiment Run End Time	2021-11-30 00:40:11 AM CST
Experiment Type	Comparative Cт (ΔΔCт)
Instrument Type	QuantStudio(TM) 6 Flex System
Passive Reference	ROX
Quantification Cycle Method	Ct
Signal Smoothing On	true
Stage/ Cycle where Analysis is performed	Stage 2, Step 2
User Name
Well	Well Position	Sample Name	Target Name	Task	Reporter	Quencher	CT	Ct Mean	Ct SD	Tm1	Ct Threshold
222	J6		hsa-circ-0007905	NTC	SYBR	None	Undetermined			61.257	0.1
247	K7	HLE-B3 NC-1	hsa-circ-0007905	UNKNOWN	SYBR	None	24.8703	25.0151	0.203898	79.9144	0.1
248	K8	HLE-B3 NC-1	hsa-circ-0007905	UNKNOWN	SYBR	None	24.9267	25.0151	0.203898	79.9144	0.1
249	K9	HLE-B3 NC-1	hsa-circ-0007905	UNKNOWN	SYBR	None	25.2483	25.0151	0.203898	79.9144	0.1
271	L7	HLE-B3 NC-2	hsa-circ-0007905	UNKNOWN	SYBR	None	25.2091	25.1657	0.0588758	79.9144	0.1
272	L8	HLE-B3 NC-2	hsa-circ-0007905	UNKNOWN	SYBR	None	25.1893	25.1657	0.0588758	79.9144	0.1
273	L9	HLE-B3 NC-2	hsa-circ-0007905	UNKNOWN	SYBR	None	25.0987	25.1657	0.0588758	79.6514	0.1
295	M7	HLE-B3 NC-3	hsa-circ-0007905	UNKNOWN	SYBR	None	25.2312	25.0514	0.156167	79.7829	0.1
296	M8	HLE-B3 NC-3	hsa-circ-0007905	UNKNOWN	SYBR	None	24.949	25.0514	0.156167	79.9144	0.1
297	M9	HLE-B3 NC-3	hsa-circ-0007905	UNKNOWN	SYBR	None	24.9741	25.0514	0.156167	79.9144	0.1
319	N7	HLE-B3 紫外-1	hsa-circ-0007905	UNKNOWN	SYBR	None	24.7735	24.8519	0.0954531	79.9144	0.1
320	N8	HLE-B3 紫外-1	hsa-circ-0007905	UNKNOWN	SYBR	None	24.9582	24.8519	0.0954531	79.9144	0.1
321	N9	HLE-B3 紫外-1	hsa-circ-0007905	UNKNOWN	SYBR	None	24.8241	24.8519	0.0954531	79.9144	0.1
343	O7	HLE-B3 紫外-2	hsa-circ-0007905	UNKNOWN	SYBR	None	24.8134	24.9209	0.0955625	79.9144	0.1
344	O8	HLE-B3 紫外-2	hsa-circ-0007905	UNKNOWN	SYBR	None	24.9532	24.9209	0.0955625	79.9144	0.1
345	O9	HLE-B3 紫外-2	hsa-circ-0007905	UNKNOWN	SYBR	None	24.9961	24.9209	0.0955625	79.9144	0.1
367	P7	HLE-B3 紫外-3	hsa-circ-0007905	UNKNOWN	SYBR	None	24.8356	24.8783	0.0535215	79.9144	0.1
368	P8	HLE-B3 紫外-3	hsa-circ-0007905	UNKNOWN	SYBR	None	24.8611	24.8783	0.0535215	79.9144	0.1
369	P9	HLE-B3 紫外-3	hsa-circ-0007905	UNKNOWN	SYBR	None	24.9384	24.8783	0.0535215	79.6514	0.1
Analysis Type	Singleplex
Endogenous Control	Actin
RQ Min/Max Confidence Level	95.0
Reference Sample	HLE-B3 NC-1
