# Supplementary material for: METTL3-mediated m6A modification of has_circ_0007905 promotes age-related cataract progression through miR-6749-3p/EIF4EBP1
Source: PeerJ journal article supplement (doi:10.7717/peerj.14863), 2023-03-06
Supplement: Raw_data.zip [file Realtime PCR raw CT data.xls]

## Sheet: Actin
Block Type	384-Well Block
Chemistry	SYBR_GREEN
Experiment Name	2021-11-16 152450 wangli
Experiment Run End Time	2021-11-17 01:49:51 AM CST
Experiment Type	Comparative Cт (ΔΔCт)
Instrument Type	QuantStudio(TM) 6 Flex System
Passive Reference	ROX
Quantification Cycle Method	Ct
Signal Smoothing On	true
Stage/ Cycle where Analysis is performed	Stage 2, Step 2
User Name
Well	Well Position	Sample Name	Target Name	Task	Reporter	Quencher	CT	Ct Mean	Ct SD	Tm1	Ct Threshold
13	A13	HLE-B3 NC-1	Actin	UNKNOWN	SYBR	None	14.592	14.7166	0.110396	88.4056	0.1
14	A14	HLE-B3 NC-1	Actin	UNKNOWN	SYBR	None	14.7554	14.7166	0.110396	88.4056	0.1
15	A15	HLE-B3 NC-1	Actin	UNKNOWN	SYBR	None	14.8023	14.7166	0.110396	88.4056	0.1
37	B13	HLE-B3 NC-2	Actin	UNKNOWN	SYBR	None	14.7677	14.7127	0.077055	88.4056	0.1
38	B14	HLE-B3 NC-2	Actin	UNKNOWN	SYBR	None	14.6246	14.7127	0.077055	88.4056	0.1
39	B15	HLE-B3 NC-2	Actin	UNKNOWN	SYBR	None	14.7457	14.7127	0.077055	88.2738	0.1
61	C13	HLE-B3 NC-3	Actin	UNKNOWN	SYBR	None	14.5685	14.6176	0.0450531	88.4056	0.1
62	C14	HLE-B3 NC-3	Actin	UNKNOWN	SYBR	None	14.6571	14.6176	0.0450531	88.4056	0.1
63	C15	HLE-B3 NC-3	Actin	UNKNOWN	SYBR	None	14.6273	14.6176	0.0450531	88.4056	0.1
85	D13	HLE-B3 紫外-1	Actin	UNKNOWN	SYBR	None	14.6783	14.6982	0.0788767	88.4056	0.1
86	D14	HLE-B3 紫外-1	Actin	UNKNOWN	SYBR	None	14.6312	14.6982	0.0788767	88.4056	0.1
87	D15	HLE-B3 紫外-1	Actin	UNKNOWN	SYBR	None	14.7851	14.6982	0.0788767	88.4056	0.1
109	E13	HLE-B3 紫外-2	Actin	UNKNOWN	SYBR	None	14.7559	14.7158	0.048775	88.4056	0.1
110	E14	HLE-B3 紫外-2	Actin	UNKNOWN	SYBR	None	14.6615	14.7158	0.048775	88.4056	0.1
111	E15	HLE-B3 紫外-2	Actin	UNKNOWN	SYBR	None	14.7299	14.7158	0.048775	88.4056	0.1
133	F13	HLE-B3 紫外-3	Actin	UNKNOWN	SYBR	None	14.7545	14.8151	0.0725887	88.5375	0.1
134	F14	HLE-B3 紫外-3	Actin	UNKNOWN	SYBR	None	14.7953	14.8151	0.0725887	88.5375	0.1
135	F15	HLE-B3 紫外-3	Actin	UNKNOWN	SYBR	None	14.8956	14.8151	0.0725887	88.4056	0.1
376	P16		Actin	NTC	SYBR	None	Undetermined			61.025	0.1
Analysis Type	Singleplex
Endogenous Control	Actin
RQ Min/Max Confidence Level	95.0
Reference Sample	HLE-B3 NC-1

## Sheet: hsa-circ-0035228
Block Type	384-Well Block
Chemistry	SYBR_GREEN
Experiment Name	2021-11-16 152450 wangli
Experiment Run End Time	2021-11-17 01:49:51 AM CST
Experiment Type	Comparative Cт (ΔΔCт)
Instrument Type	QuantStudio(TM) 6 Flex System
Passive Reference	ROX
Quantification Cycle Method	Ct
Signal Smoothing On	true
Stage/ Cycle where Analysis is performed	Stage 2, Step 2
User Name
Well	Well Position	Sample Name	Target Name	Task	Reporter	Quencher	CT	Ct Mean	Ct SD	Tm1	Ct Threshold
16	A16	HLE-B3 NC-1	hsa-circ-0035228	UNKNOWN	SYBR	None	24.6829	24.6942	0.107205	76.275	0.1
17	A17	HLE-B3 NC-1	hsa-circ-0035228	UNKNOWN	SYBR	None	24.593	24.6942	0.107205	76.275	0.1
18	A18	HLE-B3 NC-1	hsa-circ-0035228	UNKNOWN	SYBR	None	24.8065	24.6942	0.107205	76.275	0.1
40	B16	HLE-B3 NC-2	hsa-circ-0035228	UNKNOWN	SYBR	None	24.7199	24.7648	0.0777019	76.275	0.1
41	B17	HLE-B3 NC-2	hsa-circ-0035228	UNKNOWN	SYBR	None	24.8546	24.7648	0.0777019	76.275	0.1
42	B18	HLE-B3 NC-2	hsa-circ-0035228	UNKNOWN	SYBR	None	24.72	24.7648	0.0777019	76.275	0.1
64	C16	HLE-B3 NC-3	hsa-circ-0035228	UNKNOWN	SYBR	None	24.5405	24.5769	0.0702272	76.275	0.1
65	C17	HLE-B3 NC-3	hsa-circ-0035228	UNKNOWN	SYBR	None	24.6578	24.5769	0.0702272	76.275	0.1
66	C18	HLE-B3 NC-3	hsa-circ-0035228	UNKNOWN	SYBR	None	24.5323	24.5769	0.0702272	76.275	0.1
88	D16	HLE-B3 紫外-1	hsa-circ-0035228	UNKNOWN	SYBR	None	24.4957	24.4971	0.0970242	76.275	0.1
89	D17	HLE-B3 紫外-1	hsa-circ-0035228	UNKNOWN	SYBR	None	24.4008	24.4971	0.0970242	76.275	0.1
90	D18	HLE-B3 紫外-1	hsa-circ-0035228	UNKNOWN	SYBR	None	24.5949	24.4971	0.0970242	76.275	0.1
112	E16	HLE-B3 紫外-2	hsa-circ-0035228	UNKNOWN	SYBR	None	24.558	24.579	0.0618185	76.275	0.1
113	E17	HLE-B3 紫外-2	hsa-circ-0035228	UNKNOWN	SYBR	None	24.6487	24.579	0.0618185	76.275	0.1
114	E18	HLE-B3 紫外-2	hsa-circ-0035228	UNKNOWN	SYBR	None	24.5305	24.579	0.0618185	76.275	0.1
136	F16	HLE-B3 紫外-3	hsa-circ-0035228	UNKNOWN	SYBR	None	24.7389	24.5864	0.137906	76.275	0.1
137	F17	HLE-B3 紫外-3	hsa-circ-0035228	UNKNOWN	SYBR	None	24.4704	24.5864	0.137906	76.275	0.1
138	F18	HLE-B3 紫外-3	hsa-circ-0035228	UNKNOWN	SYBR	None	24.55	24.5864	0.137906	76.275	0.1
377	P17		hsa-circ-0035228	NTC	SYBR	None	Undetermined			60.8677	0.1
Analysis Type	Singleplex
Endogenous Control	Actin
RQ Min/Max Confidence Level	95.0
Reference Sample	HLE-B3 NC-1

## Sheet: METTL3
Block Type	384-Well Block
Chemistry	SYBR_GREEN
Experiment Name	2021-11-16 152450 wangli
Experiment Run End Time	2021-11-17 01:49:51 AM CST
Experiment Type	Comparative Cт (ΔΔCт)
Instrument Type	QuantStudio(TM) 6 Flex System
Passive Reference	ROX
Quantification Cycle Method	Ct
Signal Smoothing On	true
Stage/ Cycle where Analysis is performed	Stage 2, Step 2
User Name
Well	Well Position	Sample Name	Target Name	Task	Reporter	Quencher	CT	Ct Mean	Ct SD	Tm1	Ct Threshold
19	A19	HLE-B3 NC-1	METTL3	UNKNOWN	SYBR	None	23.2434	23.0171	0.199189	82.3403	0.1
20	A20	HLE-B3 NC-1	METTL3	UNKNOWN	SYBR	None	22.9394	23.0171	0.199189	82.3403	0.1
21	A21	HLE-B3 NC-1	METTL3	UNKNOWN	SYBR	None	22.8685	23.0171	0.199189	82.2084	0.1
43	B19	HLE-B3 NC-2	METTL3	UNKNOWN	SYBR	None	23.0551	23.1316	0.0910783	82.3403	0.1
44	B20	HLE-B3 NC-2	METTL3	UNKNOWN	SYBR	None	23.2324	23.1316	0.0910783	82.3403	0.1
45	B21	HLE-B3 NC-2	METTL3	UNKNOWN	SYBR	None	23.1073	23.1316	0.0910783	82.3403	0.1
67	C19	HLE-B3 NC-3	METTL3	UNKNOWN	SYBR	None	23.3229	23.1687	0.133599	82.3403	0.1
68	C20	HLE-B3 NC-3	METTL3	UNKNOWN	SYBR	None	23.0866	23.1687	0.133599	82.3403	0.1
69	C21	HLE-B3 NC-3	METTL3	UNKNOWN	SYBR	None	23.0967	23.1687	0.133599	82.3403	0.1
91	D19	HLE-B3 紫外-1	METTL3	UNKNOWN	SYBR	None	22.8429	22.8303	0.047351	82.3403	0.1
92	D20	HLE-B3 紫外-1	METTL3	UNKNOWN	SYBR	None	22.87	22.8303	0.047351	82.3403	0.1
93	D21	HLE-B3 紫外-1	METTL3	UNKNOWN	SYBR	None	22.7779	22.8303	0.047351	82.3403	0.1
115	E19	HLE-B3 紫外-2	METTL3	UNKNOWN	SYBR	None	22.8326	22.7983	0.0808291	82.3403	0.1
116	E20	HLE-B3 紫外-2	METTL3	UNKNOWN	SYBR	None	22.8563	22.7983	0.0808291	82.4722	0.1
117	E21	HLE-B3 紫外-2	METTL3	UNKNOWN	SYBR	None	22.706	22.7983	0.0808291	82.3403	0.1
139	F19	HLE-B3 紫外-3	METTL3	UNKNOWN	SYBR	None	22.6048	22.8621	0.257143	82.4722	0.1
140	F20	HLE-B3 紫外-3	METTL3	UNKNOWN	SYBR	None	23.1191	22.8621	0.257143	82.4722	0.1
141	F21	HLE-B3 紫外-3	METTL3	UNKNOWN	SYBR	None	22.8625	22.8621	0.257143	82.4722	0.1
378	P18		METTL3	NTC	SYBR	None	Undetermined			61.4081	0.1
Analysis Type	Singleplex
Endogenous Control	Actin
RQ Min/Max Confidence Level	95.0
Reference Sample	HLE-B3 NC-1
