# Supplementary material for: METTL3-mediated m6A modification of has_circ_0007905 promotes age-related cataract progression through miR-6749-3p/EIF4EBP1
Source: PeerJ journal article supplement (doi:10.7717/peerj.14863), 2023-03-06
Supplement: Raw_data.zip [file Realtime PCR raw CT data.xls]

## Sheet: Actin
Block Type	384-Well Block
Chemistry	SYBR_GREEN
Experiment Name	2022-02-08 144208 wangli
Experiment Run End Time	2022-02-09 01:06:49 AM CST
Experiment Type	Comparative Cт (ΔΔCт)
Instrument Type	QuantStudio(TM) 6 Flex System
Passive Reference	ROX
Quantification Cycle Method	Ct
Signal Smoothing On	true
Stage/ Cycle where Analysis is performed	Stage 2, Step 2
User Name
Well	Well Position	Sample Name	Target Name	Task	Reporter	Quencher	CT	Ct Mean	Ct SD	Tm1	Ct Threshold
22	A22	si-METTL3-NC-1	Actin	UNKNOWN	SYBR	None	14.566	14.4656	0.190324	88.2633	0.1
23	A23	si-METTL3-NC-1	Actin	UNKNOWN	SYBR	None	14.5847	14.4656	0.190324	88.2633	0.1
24	A24	si-METTL3-NC-1	Actin	UNKNOWN	SYBR	None	14.2461	14.4656	0.190324	88.1315	0.1
46	B22	si-METTL3-NC-2	Actin	UNKNOWN	SYBR	None	14.4327	14.4048	0.159662	88.2633	0.1
47	B23	si-METTL3-NC-2	Actin	UNKNOWN	SYBR	None	14.5487	14.4048	0.159662	88.2633	0.1
48	B24	si-METTL3-NC-2	Actin	UNKNOWN	SYBR	None	14.2331	14.4048	0.159662	88.2633	0.1
70	C22	si-METTL3-NC-3	Actin	UNKNOWN	SYBR	None	14.1837	14.2638	0.10067	88.2633	0.1
71	C23	si-METTL3-NC-3	Actin	UNKNOWN	SYBR	None	14.3768	14.2638	0.10067	88.2633	0.1
72	C24	si-METTL3-NC-3	Actin	UNKNOWN	SYBR	None	14.2309	14.2638	0.10067	88.2633	0.1
94	D22	si-METTL3-968-1	Actin	UNKNOWN	SYBR	None	14.3176	14.1606	0.197475	88.1315	0.1
95	D23	si-METTL3-968-1	Actin	UNKNOWN	SYBR	None	14.2252	14.1606	0.197475	88.1315	0.1
96	D24	si-METTL3-968-1	Actin	UNKNOWN	SYBR	None	13.9389	14.1606	0.197475	88.1315	0.1
118	E22	si-METTL3-968-2	Actin	UNKNOWN	SYBR	None	14.159	14.1992	0.254092	88.2633	0.1
119	E23	si-METTL3-968-2	Actin	UNKNOWN	SYBR	None	14.4709	14.1992	0.254092	88.1315	0.1
120	E24	si-METTL3-968-2	Actin	UNKNOWN	SYBR	None	13.9675	14.1992	0.254092	88.1315	0.1
142	F22	si-METTL3-968-3	Actin	UNKNOWN	SYBR	None	14.0378	14.1354	0.084641	88.2633	0.1
143	F23	si-METTL3-968-3	Actin	UNKNOWN	SYBR	None	14.1879	14.1354	0.084641	88.2633	0.1
144	F24	si-METTL3-968-3	Actin	UNKNOWN	SYBR	None	14.1807	14.1354	0.084641	88.1315	0.1
310	M22		Actin	NTC	SYBR	None	Undetermined			61.7273	0.1
Analysis Type	Singleplex
Endogenous Control	Actin
RQ Min/Max Confidence Level	95.0
Reference Sample	si-METTL3-968-1

## Sheet: hsa-circ-0007905
Block Type	384-Well Block
Chemistry	SYBR_GREEN
Experiment Name	2022-02-08 144208 wangli
Experiment Run End Time	2022-02-09 01:06:49 AM CST
Experiment Type	Comparative Cт (ΔΔCт)
Instrument Type	QuantStudio(TM) 6 Flex System
Passive Reference	ROX
Quantification Cycle Method	Ct
Signal Smoothing On	true
Stage/ Cycle where Analysis is performed	Stage 2, Step 2
User Name
Well	Well Position	Sample Name	Target Name	Task	Reporter	Quencher	CT	Ct Mean	Ct SD	Tm1	Ct Threshold
166	G22	si-METTL3-NC-1	hsa-circ-0007905	UNKNOWN	SYBR	None	23.5381	23.6517	0.252802	79.9606	0.1
167	G23	si-METTL3-NC-1	hsa-circ-0007905	UNKNOWN	SYBR	None	23.9413	23.6517	0.252802	79.9606	0.1
168	G24	si-METTL3-NC-1	hsa-circ-0007905	UNKNOWN	SYBR	None	23.4755	23.6517	0.252802	79.9606	0.1
190	H22	si-METTL3-NC-2	hsa-circ-0007905	UNKNOWN	SYBR	None	23.884	23.6977	0.162852	80.0924	0.1
191	H23	si-METTL3-NC-2	hsa-circ-0007905	UNKNOWN	SYBR	None	23.6265	23.6977	0.162852	79.9606	0.1
192	H24	si-METTL3-NC-2	hsa-circ-0007905	UNKNOWN	SYBR	None	23.5825	23.6977	0.162852	79.8288	0.1
214	I22	si-METTL3-NC-3	hsa-circ-0007905	UNKNOWN	SYBR	None	23.9111	23.7514	0.213647	80.0924	0.1
215	I23	si-METTL3-NC-3	hsa-circ-0007905	UNKNOWN	SYBR	None	23.8345	23.7514	0.213647	80.0924	0.1
216	I24	si-METTL3-NC-3	hsa-circ-0007905	UNKNOWN	SYBR	None	23.5087	23.7514	0.213647	79.9606	0.1
238	J22	si-METTL3-968-1	hsa-circ-0007905	UNKNOWN	SYBR	None	23.8361	23.8592	0.0248901	79.9606	0.1
239	J23	si-METTL3-968-1	hsa-circ-0007905	UNKNOWN	SYBR	None	23.8558	23.8592	0.0248901	79.9606	0.1
240	J24	si-METTL3-968-1	hsa-circ-0007905	UNKNOWN	SYBR	None	23.8856	23.8592	0.0248901	79.9606	0.1
262	K22	si-METTL3-968-2	hsa-circ-0007905	UNKNOWN	SYBR	None	23.9452	24.0653	0.137204	79.9606	0.1
263	K23	si-METTL3-968-2	hsa-circ-0007905	UNKNOWN	SYBR	None	24.0358	24.0653	0.137204	79.9606	0.1
264	K24	si-METTL3-968-2	hsa-circ-0007905	UNKNOWN	SYBR	None	24.2148	24.0653	0.137204	79.9606	0.1
286	L22	si-METTL3-968-3	hsa-circ-0007905	UNKNOWN	SYBR	None	23.8497	24.0245	0.18057	79.8288	0.1
287	L23	si-METTL3-968-3	hsa-circ-0007905	UNKNOWN	SYBR	None	24.0133	24.0245	0.18057	79.9606	0.1
288	L24	si-METTL3-968-3	hsa-circ-0007905	UNKNOWN	SYBR	None	24.2103	24.0245	0.18057	79.9606	0.1
311	M23		hsa-circ-0007905	NTC	SYBR	None	Undetermined			60.9534	0.1
Analysis Type	Singleplex
Endogenous Control	Actin
RQ Min/Max Confidence Level	95.0
Reference Sample	si-METTL3-968-1
