# Supplementary material for: METTL3-mediated m6A modification of has_circ_0007905 promotes age-related cataract progression through miR-6749-3p/EIF4EBP1
Source: PeerJ journal article supplement (doi:10.7717/peerj.14863), 2023-03-06
Supplement: Raw_data.zip [file Realtime PCR raw CT data.xls]

## Sheet: Actin
Block Type	384-Well Block
Chemistry	SYBR_GREEN
Experiment Name	2022-06-16 112101 wangli
Experiment Run End Time	2022-06-16 21:43:17 PM CST
Experiment Type	Comparative Cт (ΔΔCт)
Instrument Type	QuantStudio(TM) 6 Flex System
Passive Reference	ROX
Quantification Cycle Method	Ct
Signal Smoothing On	true
Stage/ Cycle where Analysis is performed	Stage 2, Step 2
User Name
Well	Well Position	Sample Name	Target Name	Task	Reporter	Quencher	CT	Ct Mean	Ct SD	Tm1	Ct Threshold
16	A16	HLE-B3 NC-1	Actin	UNKNOWN	SYBR	None	17.1103	17.2546	0.25405	88.3945	0.1
17	A17	HLE-B3 NC-1	Actin	UNKNOWN	SYBR	None	17.1056	17.2546	0.25405	88.2627	0.1
18	A18	HLE-B3 NC-1	Actin	UNKNOWN	SYBR	None	17.5479	17.2546	0.25405	88.2627	0.1
40	B16	HLE-B3 NC-2	Actin	UNKNOWN	SYBR	None	17.1711	17.4647	0.264267	88.2627	0.1
41	B17	HLE-B3 NC-2	Actin	UNKNOWN	SYBR	None	17.5395	17.4647	0.264267	88.2627	0.1
42	B18	HLE-B3 NC-2	Actin	UNKNOWN	SYBR	None	17.6835	17.4647	0.264267	88.2627	0.1
64	C16	HLE-B3 NC-3	Actin	UNKNOWN	SYBR	None	17.254	17.189	0.0708296	88.3945	0.1
65	C17	HLE-B3 NC-3	Actin	UNKNOWN	SYBR	None	17.1135	17.189	0.0708296	88.2627	0.1
66	C18	HLE-B3 NC-3	Actin	UNKNOWN	SYBR	None	17.1996	17.189	0.0708296	88.2627	0.1
88	D16	HLE-B3 EIF4EBP1 OE-1	Actin	UNKNOWN	SYBR	None	17.1992	17.1997	0.0581488	88.2627	0.1
89	D17	HLE-B3 EIF4EBP1 OE-1	Actin	UNKNOWN	SYBR	None	17.2581	17.1997	0.0581488	88.2627	0.1
90	D18	HLE-B3 EIF4EBP1 OE-1	Actin	UNKNOWN	SYBR	None	17.1418	17.1997	0.0581488	88.2627	0.1
112	E16	HLE-B3 EIF4EBP1 OE-2	Actin	UNKNOWN	SYBR	None	17.2145	17.2371	0.177669	88.2627	0.1
113	E17	HLE-B3 EIF4EBP1 OE-2	Actin	UNKNOWN	SYBR	None	17.0718	17.2371	0.177669	88.3945	0.1
114	E18	HLE-B3 EIF4EBP1 OE-2	Actin	UNKNOWN	SYBR	None	17.4249	17.2371	0.177669	88.3945	0.1
136	F16	HLE-B3 EIF4EBP1 OE-3	Actin	UNKNOWN	SYBR	None	17.3242	17.2987	0.0518008	88.3945	0.1
137	F17	HLE-B3 EIF4EBP1 OE-3	Actin	UNKNOWN	SYBR	None	17.3327	17.2987	0.0518008	88.3945	0.1
138	F18	HLE-B3 EIF4EBP1 OE-3	Actin	UNKNOWN	SYBR	None	17.239	17.2987	0.0518008	88.3945	0.1
256	K16		Actin	NTC	SYBR	None	Undetermined			61.2469	0.1
Analysis Type	Singleplex
Endogenous Control	Actin
RQ Min/Max Confidence Level	95.0
Reference Sample	HLE-B3 EIF4EBP1 OE-1

## Sheet: EIF4EBP1
Block Type	384-Well Block
Chemistry	SYBR_GREEN
Experiment Name	2022-06-16 112101 wangli
Experiment Run End Time	2022-06-16 21:43:17 PM CST
Experiment Type	Comparative Cт (ΔΔCт)
Instrument Type	QuantStudio(TM) 6 Flex System
Passive Reference	ROX
Quantification Cycle Method	Ct
Signal Smoothing On	true
Stage/ Cycle where Analysis is performed	Stage 2, Step 2
User Name
Well	Well Position	Sample Name	Target Name	Task	Reporter	Quencher	CT	Ct Mean	Ct SD	Tm1	Ct Threshold
19	A19	HLE-B3 NC-1	EIF4EBP1	UNKNOWN	SYBR	None	19.1959	19.2991	0.107641	83.2548	0.1
20	A20	HLE-B3 NC-1	EIF4EBP1	UNKNOWN	SYBR	None	19.2907	19.2991	0.107641	83.2548	0.1
21	A21	HLE-B3 NC-1	EIF4EBP1	UNKNOWN	SYBR	None	19.4107	19.2991	0.107641	83.2548	0.1
43	B19	HLE-B3 NC-2	EIF4EBP1	UNKNOWN	SYBR	None	19.327	19.2963	0.0383625	83.2548	0.1
44	B20	HLE-B3 NC-2	EIF4EBP1	UNKNOWN	SYBR	None	19.3086	19.2963	0.0383625	83.2548	0.1
45	B21	HLE-B3 NC-2	EIF4EBP1	UNKNOWN	SYBR	None	19.2533	19.2963	0.0383625	83.2548	0.1
67	C19	HLE-B3 NC-3	EIF4EBP1	UNKNOWN	SYBR	None	19.1221	19.2084	0.0947597	83.3866	0.1
68	C20	HLE-B3 NC-3	EIF4EBP1	UNKNOWN	SYBR	None	19.1933	19.2084	0.0947597	83.2548	0.1
69	C21	HLE-B3 NC-3	EIF4EBP1	UNKNOWN	SYBR	None	19.3098	19.2084	0.0947597	83.2548	0.1
91	D19	HLE-B3 EIF4EBP1 OE-1	EIF4EBP1	UNKNOWN	SYBR	None	13.9365	13.8867	0.0603053	83.3866	0.1
92	D20	HLE-B3 EIF4EBP1 OE-1	EIF4EBP1	UNKNOWN	SYBR	None	13.8197	13.8867	0.0603053	83.3866	0.1
93	D21	HLE-B3 EIF4EBP1 OE-1	EIF4EBP1	UNKNOWN	SYBR	None	13.904	13.8867	0.0603053	83.3866	0.1
115	E19	HLE-B3 EIF4EBP1 OE-2	EIF4EBP1	UNKNOWN	SYBR	None	14.0747	13.9957	0.122112	83.3866	0.1
116	E20	HLE-B3 EIF4EBP1 OE-2	EIF4EBP1	UNKNOWN	SYBR	None	14.0572	13.9957	0.122112	83.3866	0.1
117	E21	HLE-B3 EIF4EBP1 OE-2	EIF4EBP1	UNKNOWN	SYBR	None	13.855	13.9957	0.122112	83.3866	0.1
139	F19	HLE-B3 EIF4EBP1 OE-3	EIF4EBP1	UNKNOWN	SYBR	None	13.971	14.041	0.119741	83.3866	0.1
140	F20	HLE-B3 EIF4EBP1 OE-3	EIF4EBP1	UNKNOWN	SYBR	None	13.9727	14.041	0.119741	83.3866	0.1
141	F21	HLE-B3 EIF4EBP1 OE-3	EIF4EBP1	UNKNOWN	SYBR	None	14.1792	14.041	0.119741	83.3866	0.1
257	K17		EIF4EBP1	NTC	SYBR	None	Undetermined			61.7741	0.1
Analysis Type	Singleplex
Endogenous Control	Actin
RQ Min/Max Confidence Level	95.0
Reference Sample	HLE-B3 EIF4EBP1 OE-1
