# Supplementary material for: METTL3-mediated m6A modification of has_circ_0007905 promotes age-related cataract progression through miR-6749-3p/EIF4EBP1
Source: PeerJ journal article supplement (doi:10.7717/peerj.14863), 2023-03-06
Supplement: Raw_data.zip [file Realtime PCR raw CT data.xls]

## Sheet: Actin
Block Type	384-Well Block
Chemistry	SYBR_GREEN
Experiment Name	2021-12-02 152156 wangli
Experiment Run End Time	2021-12-03 01:45:05 AM CST
Experiment Type	Comparative Cт (ΔΔCт)
Instrument Type	QuantStudio(TM) 6 Flex System
Passive Reference	ROX
Quantification Cycle Method	Ct
Signal Smoothing On	true
Stage/ Cycle where Analysis is performed	Stage 2, Step 2
User Name
Well	Well Position	Sample Name	Target Name	Task	Reporter	Quencher	CT	Ct Mean	Ct SD	Tm1	Ct Threshold
160	G16	si-NC-1	Actin	UNKNOWN	SYBR	None	14.7794	14.6998	0.310743	88.1896	0.1
161	G17	si-NC-1	Actin	UNKNOWN	SYBR	None	14.9631	14.6998	0.310743	88.1896	0.1
162	G18	si-NC-1	Actin	UNKNOWN	SYBR	None	14.3571	14.6998	0.310743	88.1896	0.1
184	H16	si-NC-2	Actin	UNKNOWN	SYBR	None	14.9523	15.0377	0.137333	88.1896	0.1
185	H17	si-NC-2	Actin	UNKNOWN	SYBR	None	14.9647	15.0377	0.137333	88.1896	0.1
186	H18	si-NC-2	Actin	UNKNOWN	SYBR	None	15.1961	15.0377	0.137333	88.1896	0.1
208	I16	si-NC-3	Actin	UNKNOWN	SYBR	None	14.8697	14.8849	0.315918	87.9254	0.1
209	I17	si-NC-3	Actin	UNKNOWN	SYBR	None	15.2082	14.8849	0.315918	88.3216	0.1
210	I18	si-NC-3	Actin	UNKNOWN	SYBR	None	14.5769	14.8849	0.315918	88.1896	0.1
232	J16	si-circ-0007905-1-1	Actin	UNKNOWN	SYBR	None	14.2909	14.295	0.0823341	88.1896	0.1
233	J17	si-circ-0007905-1-1	Actin	UNKNOWN	SYBR	None	14.3793	14.295	0.0823341	88.1896	0.1
234	J18	si-circ-0007905-1-1	Actin	UNKNOWN	SYBR	None	14.2148	14.295	0.0823341	88.1896	0.1
256	K16	si-circ-0007905-1-2	Actin	UNKNOWN	SYBR	None	14.3401	14.3764	0.0330798	88.1896	0.1
257	K17	si-circ-0007905-1-2	Actin	UNKNOWN	SYBR	None	14.4047	14.3764	0.0330798	88.1896	0.1
258	K18	si-circ-0007905-1-2	Actin	UNKNOWN	SYBR	None	14.3845	14.3764	0.0330798	88.1896	0.1
280	L16	si-circ-0007905-1-3	Actin	UNKNOWN	SYBR	None	14.5563	14.5011	0.056481	88.1896	0.1
281	L17	si-circ-0007905-1-3	Actin	UNKNOWN	SYBR	None	14.5036	14.5011	0.056481	88.1896	0.1
282	L18	si-circ-0007905-1-3	Actin	UNKNOWN	SYBR	None	14.4434	14.5011	0.056481	88.1896	0.1
304	M16	si-circ-0007905-2-1	Actin	UNKNOWN	SYBR	None	14.49	14.5418	0.16981	88.1896	0.1
305	M17	si-circ-0007905-2-1	Actin	UNKNOWN	SYBR	None	14.7315	14.5418	0.16981	88.1896	0.1
306	M18	si-circ-0007905-2-1	Actin	UNKNOWN	SYBR	None	14.404	14.5418	0.16981	88.1896	0.1
328	N16	si-circ-0007905-2-2	Actin	UNKNOWN	SYBR	None	14.6927	14.6335	0.0640591	87.3971	0.1
329	N17	si-circ-0007905-2-2	Actin	UNKNOWN	SYBR	None	14.6424	14.6335	0.0640591	88.1896	0.1
330	N18	si-circ-0007905-2-2	Actin	UNKNOWN	SYBR	None	14.5655	14.6335	0.0640591	88.0575	0.1
352	O16	si-circ-0007905-2-3	Actin	UNKNOWN	SYBR	None	14.7084	14.6131	0.194502	88.1896	0.1
353	O17	si-circ-0007905-2-3	Actin	UNKNOWN	SYBR	None	14.7416	14.6131	0.194502	88.1896	0.1
354	O18	si-circ-0007905-2-3	Actin	UNKNOWN	SYBR	None	14.3893	14.6131	0.194502	88.1896	0.1
376	P16		Actin	NTC	SYBR	None	Undetermined			60.9633	0.1
Analysis Type	Singleplex
Endogenous Control	hsa-circ-0007905
RQ Min/Max Confidence Level	95.0
Reference Sample	si-NC-1

## Sheet: hsa-circ-0007905
Block Type	384-Well Block
Chemistry	SYBR_GREEN
Experiment Name	2021-12-02 152156 wangli
Experiment Run End Time	2021-12-03 01:45:05 AM CST
Experiment Type	Comparative Cт (ΔΔCт)
Instrument Type	QuantStudio(TM) 6 Flex System
Passive Reference	ROX
Quantification Cycle Method	Ct
Signal Smoothing On	true
Stage/ Cycle where Analysis is performed	Stage 2, Step 2
User Name
Well	Well Position	Sample Name	Target Name	Task	Reporter	Quencher	CT	Ct Mean	Ct SD	Tm1	Ct Threshold
163	G19	si-NC-1	hsa-circ-0007905	UNKNOWN	SYBR	None	24.8402	25.0775	0.206332	79.8692	0.1
164	G20	si-NC-1	hsa-circ-0007905	UNKNOWN	SYBR	None	25.2144	25.0775	0.206332	79.8692	0.1
165	G21	si-NC-1	hsa-circ-0007905	UNKNOWN	SYBR	None	25.178	25.0775	0.206332	79.8692	0.1
187	H19	si-NC-2	hsa-circ-0007905	UNKNOWN	SYBR	None	25.1114	25.1841	0.0789619	79.8692	0.1
188	H20	si-NC-2	hsa-circ-0007905	UNKNOWN	SYBR	None	25.1728	25.1841	0.0789619	79.8692	0.1
189	H21	si-NC-2	hsa-circ-0007905	UNKNOWN	SYBR	None	25.2681	25.1841	0.0789619	79.8692	0.1
211	I19	si-NC-3	hsa-circ-0007905	UNKNOWN	SYBR	None	25.0997	25.0421	0.132994	79.8692	0.1
212	I20	si-NC-3	hsa-circ-0007905	UNKNOWN	SYBR	None	24.8901	25.0421	0.132994	79.8692	0.1
213	I21	si-NC-3	hsa-circ-0007905	UNKNOWN	SYBR	None	25.1366	25.0421	0.132994	79.8692	0.1
235	J19	si-circ-0007905-1-1	hsa-circ-0007905	UNKNOWN	SYBR	None	26.9401	26.9213	0.0390148	80.0012	0.1
236	J20	si-circ-0007905-1-1	hsa-circ-0007905	UNKNOWN	SYBR	None	26.9474	26.9213	0.0390148	79.8692	0.1
237	J21	si-circ-0007905-1-1	hsa-circ-0007905	UNKNOWN	SYBR	None	26.8765	26.9213	0.0390148	80.1333	0.1
259	K19	si-circ-0007905-1-2	hsa-circ-0007905	UNKNOWN	SYBR	None	26.9981	26.8945	0.11534	79.8692	0.1
260	K20	si-circ-0007905-1-2	hsa-circ-0007905	UNKNOWN	SYBR	None	26.7702	26.8945	0.11534	80.0012	0.1
261	K21	si-circ-0007905-1-2	hsa-circ-0007905	UNKNOWN	SYBR	None	26.9151	26.8945	0.11534	80.0012	0.1
283	L19	si-circ-0007905-1-3	hsa-circ-0007905	UNKNOWN	SYBR	None	27.3585	27.233	0.265596	79.8692	0.1
284	L20	si-circ-0007905-1-3	hsa-circ-0007905	UNKNOWN	SYBR	None	26.9279	27.233	0.265596	80.1333	0.1
285	L21	si-circ-0007905-1-3	hsa-circ-0007905	UNKNOWN	SYBR	None	27.4126	27.233	0.265596	80.0012	0.1
307	M19	si-circ-0007905-2-1	hsa-circ-0007905	UNKNOWN	SYBR	None	25.8517	25.877	0.207796	79.8692	0.1
308	M20	si-circ-0007905-2-1	hsa-circ-0007905	UNKNOWN	SYBR	None	25.6831	25.877	0.207796	79.473	0.1
309	M21	si-circ-0007905-2-1	hsa-circ-0007905	UNKNOWN	SYBR	None	26.0963	25.877	0.207796	79.8692	0.1
331	N19	si-circ-0007905-2-2	hsa-circ-0007905	UNKNOWN	SYBR	None	26.268	26.1939	0.178313	79.8692	0.1
332	N20	si-circ-0007905-2-2	hsa-circ-0007905	UNKNOWN	SYBR	None	26.3231	26.1939	0.178313	79.473	0.1
333	N21	si-circ-0007905-2-2	hsa-circ-0007905	UNKNOWN	SYBR	None	25.9904	26.1939	0.178313	79.8692	0.1
355	O19	si-circ-0007905-2-3	hsa-circ-0007905	UNKNOWN	SYBR	None	26.4525	26.3667	0.107875	79.0768	0.1
356	O20	si-circ-0007905-2-3	hsa-circ-0007905	UNKNOWN	SYBR	None	26.4019	26.3667	0.107875	79.8692	0.1
357	O21	si-circ-0007905-2-3	hsa-circ-0007905	UNKNOWN	SYBR	None	26.2456	26.3667	0.107875	79.7371	0.1
377	P17		hsa-circ-0007905	NTC	SYBR	None	Undetermined			60.8878	0.1
Analysis Type	Singleplex
Endogenous Control	hsa-circ-0007905
RQ Min/Max Confidence Level	95.0
Reference Sample	si-NC-1
