# Supplementary material for: METTL3-mediated m6A modification of has_circ_0007905 promotes age-related cataract progression through miR-6749-3p/EIF4EBP1
Source: PeerJ journal article supplement (doi:10.7717/peerj.14863), 2023-03-06
Supplement: Raw_data.zip [file Realtime PCR raw CT data.xls]

## Sheet: Results
Block Type	384-Well Block
Chemistry	SYBR_GREEN
Experiment Name	2022-03-31 133715 wangli zhonghua wangjin
Experiment Run End Time	2022-03-31 23:53:15 PM CST
Experiment Type	Comparative Cт (ΔΔCт)
Instrument Type	QuantStudio(TM) 6 Flex System
Passive Reference	ROX
Quantification Cycle Method	Ct
Signal Smoothing On	true
Stage/ Cycle where Analysis is performed	Stage 2, Step 2
User Name
Well	Well Position	Sample Name	Target Name	Task	Reporter	CT	Ct Mean	Ct SD	Tm1	Ct Threshold
1	A1	si-METTL3 input-1	hsa-circ-0007905	UNKNOWN	SYBR	Undetermined			61.5162	0.1
2	A2	si-METTL3 input-1	hsa-circ-0007905	UNKNOWN	SYBR	Undetermined			61.6483	0.1
3	A3	si-METTL3 input-1	hsa-circ-0007905	UNKNOWN	SYBR	Undetermined			61.252	0.1
4	A4	si-METTL3 input-2	hsa-circ-0007905	UNKNOWN	SYBR	Undetermined			61.6483	0.1
5	A5	si-METTL3 input-2	hsa-circ-0007905	UNKNOWN	SYBR	Undetermined			61.5162	0.1
6	A6	si-METTL3 input-2	hsa-circ-0007905	UNKNOWN	SYBR	Undetermined			61.5162	0.1
7	A7	si-METTL3 input-3	hsa-circ-0007905	UNKNOWN	SYBR	Undetermined			61.3841	0.1
8	A8	si-METTL3 input-3	hsa-circ-0007905	UNKNOWN	SYBR	Undetermined			61.252	0.1
9	A9	si-METTL3 input-3	hsa-circ-0007905	UNKNOWN	SYBR	Undetermined			61.3841	0.1
25	B1	si-METTL3 IP-1	hsa-circ-0007905	UNKNOWN	SYBR	32.1477	31.9379	0.183625	80.1406	0.1
26	B2	si-METTL3 IP-1	hsa-circ-0007905	UNKNOWN	SYBR	31.8594	31.9379	0.183625	80.1406	0.1
27	B3	si-METTL3 IP-1	hsa-circ-0007905	UNKNOWN	SYBR	31.8066	31.9379	0.183625	80.1406	0.1
28	B4	si-METTL3 IP-2	hsa-circ-0007905	UNKNOWN	SYBR	33.197	33.1231	0.283472	80.1406	0.1
29	B5	si-METTL3 IP-2	hsa-circ-0007905	UNKNOWN	SYBR	33.3622	33.1231	0.283472	80.1406	0.1
30	B6	si-METTL3 IP-2	hsa-circ-0007905	UNKNOWN	SYBR	32.8099	33.1231	0.283472	80.1406	0.1
31	B7	si-METTL3 IP-3	hsa-circ-0007905	UNKNOWN	SYBR	33.7877	33.5995	0.227607	80.1406	0.1
32	B8	si-METTL3 IP-3	hsa-circ-0007905	UNKNOWN	SYBR	33.3465	33.5995	0.227607	80.1406	0.1
33	B9	si-METTL3 IP-3	hsa-circ-0007905	UNKNOWN	SYBR	33.6644	33.5995	0.227607	79.216	0.1
49	C1	si-NC input-1	hsa-circ-0007905	UNKNOWN	SYBR	Undetermined			62.1766	0.1
50	C2	si-NC input-1	hsa-circ-0007905	UNKNOWN	SYBR	Undetermined			61.3841	0.1
51	C3	si-NC input-1	hsa-circ-0007905	UNKNOWN	SYBR	Undetermined			61.5162	0.1
52	C4	si-NC input-2	hsa-circ-0007905	UNKNOWN	SYBR	Undetermined			61.6483	0.1
53	C5	si-NC input-2	hsa-circ-0007905	UNKNOWN	SYBR	Undetermined			61.7804	0.1
54	C6	si-NC input-2	hsa-circ-0007905	UNKNOWN	SYBR	Undetermined			61.3841	0.1
55	C7	si-NC input-3	hsa-circ-0007905	UNKNOWN	SYBR	Undetermined			61.5162	0.1
56	C8	si-NC input-3	hsa-circ-0007905	UNKNOWN	SYBR	Undetermined			61.5162	0.1
57	C9	si-NC input-3	hsa-circ-0007905	UNKNOWN	SYBR	Undetermined			61.3841	0.1
73	D1	si-NC IP-1	hsa-circ-0007905	UNKNOWN	SYBR	29.9537	29.8432	0.13418	80.0085	0.1
74	D2	si-NC IP-1	hsa-circ-0007905	UNKNOWN	SYBR	29.882	29.8432	0.13418	80.1406	0.1
75	D3	si-NC IP-1	hsa-circ-0007905	UNKNOWN	SYBR	29.6939	29.8432	0.13418	80.1406	0.1
76	D4	si-NC IP-2	hsa-circ-0007905	UNKNOWN	SYBR	30.8464	31.0809	0.292779	80.1406	0.1
77	D5	si-NC IP-2	hsa-circ-0007905	UNKNOWN	SYBR	31.409	31.0809	0.292779	80.1406	0.1
78	D6	si-NC IP-2	hsa-circ-0007905	UNKNOWN	SYBR	30.9873	31.0809	0.292779	80.1406	0.1
79	D7	si-NC IP-3	hsa-circ-0007905	UNKNOWN	SYBR	31.9657	32.1207	0.302334	80.1406	0.1
80	D8	si-NC IP-3	hsa-circ-0007905	UNKNOWN	SYBR	31.9272	32.1207	0.302334	80.1406	0.1
81	D9	si-NC IP-3	hsa-circ-0007905	UNKNOWN	SYBR	32.4691	32.1207	0.302334	80.1406	0.1
82	D10		hsa-circ-0007905	NTC	SYBR	Undetermined			61.274	0.1
Analysis Type	Singleplex
Endogenous Control	hsa-circ-0007905
RQ Min/Max Confidence Level	95.0
Reference Sample	duizhao IP-1
