# Supplementary material for: METTL3-mediated m6A modification of has_circ_0007905 promotes age-related cataract progression through miR-6749-3p/EIF4EBP1
Source: PeerJ journal article supplement (doi:10.7717/peerj.14863), 2023-03-06
Supplement: Raw_data.zip [file Realtime PCR raw CT data.xls]

## Sheet: circ0007905
Block Type	384-Well Block
Chemistry	SYBR_GREEN
Experiment Name	2022-03-25 133332 wangli
Experiment Run End Time	2022-03-25 23:58:28 PM CST
Experiment Type	Comparative Cт (ΔΔCт)
Instrument Type	QuantStudio(TM) 6 Flex System
Passive RefereUVBe	ROX
Quantification Cycle Method	Ct
Signal Smoothing On	true
Stage/ Cycle where Analysis is performed	Stage 2, Step 2
User Name
Well	Well Position	Sample Name	Target Name	Task	Reporter	QueUVBher	CT	Ct Mean	Ct SD	Tm1	Ct Threshold
13	A13	UVB input-1	circ0007905	UNKNOWN	SYBR	None	32.1883	32.4177	0.200948	82.8654	0.1
14	A14	UVB input-1	circ0007905	UNKNOWN	SYBR	None	32.5624	32.4177	0.200948	82.2434	0.1
15	A15	UVB input-1	circ0007905	UNKNOWN	SYBR	None	32.5024	32.4177	0.200948	82.4699	0.1
181	H13	UVB input-2	circ0007905	UNKNOWN	SYBR	None	32.6085	32.3723	0.208349	82.8679	0.1
182	H14	UVB input-2	circ0007905	UNKNOWN	SYBR	None	32.2146	32.3723	0.208349	82.6017	0.1
183	H15	UVB input-2	circ0007905	UNKNOWN	SYBR	None	32.2938	32.3723	0.208349	82.2434	0.1
277	L13	UVB input-3	circ0007905	UNKNOWN	SYBR	None	32.0319	31.9552	0.312485	82.4723	0.1
278	L14	UVB input-3	circ0007905	UNKNOWN	SYBR	None	32.2221	31.9552	0.312485	82.4699	0.1
279	L15	UVB input-3	circ0007905	UNKNOWN	SYBR	None	31.6115	31.9552	0.312485	82.0744	0.1
37	B13	UVB IP-1	circ0007905	UNKNOWN	SYBR	None	28.3314	28.4115	0.113485	82.6017	0.1
38	B14	UVB IP-1	circ0007905	UNKNOWN	SYBR	None	28.5414	28.4115	0.113485	82.6017	0.1
39	B15	UVB IP-1	circ0007905	UNKNOWN	SYBR	None	28.3618	28.4115	0.113485	82.6017	0.1
205	I13	UVB IP-2	circ0007905	UNKNOWN	SYBR	None	28.8257	28.8018	0.0843386	82.6017	0.1
206	I14	UVB IP-2	circ0007905	UNKNOWN	SYBR	None	28.8715	28.8018	0.0843386	82.6017	0.1
207	I15	UVB IP-2	circ0007905	UNKNOWN	SYBR	None	28.708	28.8018	0.0843386	82.4699	0.1
301	M13	UVB IP-3	circ0007905	UNKNOWN	SYBR	None	28.5727	28.7266	0.149086	82.0744	0.1
302	M14	UVB IP-3	circ0007905	UNKNOWN	SYBR	None	28.8703	28.7266	0.149086	82.6017	0.1
303	M15	UVB IP-3	circ0007905	UNKNOWN	SYBR	None	28.7369	28.7266	0.149086	82.6017	0.1
61	C13	NC input-1	circ0007905	UNKNOWN	SYBR	None	26.2905	26.264	0.0896373	82.4699	0.1
62	C14	NC input-1	circ0007905	UNKNOWN	SYBR	None	26.1641	26.264	0.0896373	82.4699	0.1
63	C15	NC input-1	circ0007905	UNKNOWN	SYBR	None	26.3374	26.264	0.0896373	82.4699	0.1
229	J13	NC input-2	circ0007905	UNKNOWN	SYBR	None	26.5492	26.2862	0.28099	82.4699	0.1
230	J14	NC input-2	circ0007905	UNKNOWN	SYBR	None	25.9902	26.2862	0.28099	82.4699	0.1
231	J15	NC input-2	circ0007905	UNKNOWN	SYBR	None	26.3193	26.2862	0.28099	82.4699	0.1
325	N13	NC input-3	circ0007905	UNKNOWN	SYBR	None	26.3119	26.0802	0.20286	82.3381	0.1
326	N14	NC input-3	circ0007905	UNKNOWN	SYBR	None	25.9942	26.0802	0.20286	82.3381	0.1
327	N15	NC input-3	circ0007905	UNKNOWN	SYBR	None	25.9345	26.0802	0.20286	82.4699	0.1
85	D13	NC IP-1	circ0007905	UNKNOWN	SYBR	None	28.3308	28.2649	0.124801	82.4699	0.1
86	D14	NC IP-1	circ0007905	UNKNOWN	SYBR	None	28.1209	28.2649	0.124801	82.4699	0.1
87	D15	NC IP-1	circ0007905	UNKNOWN	SYBR	None	28.3429	28.2649	0.124801	82.6017	0.1
253	K13	NC IP-2	circ0007905	UNKNOWN	SYBR	None	28.2906	28.0938	0.226861	82.6017	0.1
254	K14	NC IP-2	circ0007905	UNKNOWN	SYBR	None	27.8456	28.0938	0.226861	82.6017	0.1
255	K15	NC IP-2	circ0007905	UNKNOWN	SYBR	None	28.1452	28.0938	0.226861	82.6017	0.1
349	O13	NC IP-3	circ0007905	UNKNOWN	SYBR	None	27.6501	28.0496	0.351285	81.8107	0.1
350	O14	NC IP-3	circ0007905	UNKNOWN	SYBR	None	28.1884	28.0496	0.351285	82.6017	0.1
351	O15	NC IP-3	circ0007905	UNKNOWN	SYBR	None	28.3103	28.0496	0.351285	82.2062	0.1
Analysis Type	Singleplex
Endogenous Control	circ0007905
RQ Min/Max ConfideUVBe Level	95.0
RefereUVBe Sample	UVB input-3
