# Supplementary material for: METTL3-mediated m6A modification of has_circ_0007905 promotes age-related cataract progression through miR-6749-3p/EIF4EBP1
Source: PeerJ journal article supplement (doi:10.7717/peerj.14863), 2023-03-06
Supplement: Raw_data.zip [file Realtime PCR raw CT data.xls]

## Sheet: Actin
Block Type	384-Well Block
Chemistry	SYBR_GREEN
Experiment Name	2022-01-25 111551 wangli
Experiment Run End Time	2022-01-25 21:37:28 PM CST
Experiment Type	Comparative Cт (ΔΔCт)
Instrument Type	QuantStudio(TM) 6 Flex System
Passive Reference	ROX
Quantification Cycle Method	Ct
Signal Smoothing On	true
Stage/ Cycle where Analysis is performed	Stage 2, Step 2
User Name
Well	Well Position	Sample Name	Target Name	Task	Reporter	Quencher	CT	Ct Mean	Ct SD	Tm1	Ct Threshold
223	J7		Actin	NTC	SYBR	None	Undetermined			60.9078	0.1
247	K7	si-NC-1	Actin	UNKNOWN	SYBR	None	14.5557	14.4771	0.125982	88.2659	0.1
248	K8	si-NC-1	Actin	UNKNOWN	SYBR	None	14.3318	14.4771	0.125982	88.2659	0.1
249	K9	si-NC-1	Actin	UNKNOWN	SYBR	None	14.5438	14.4771	0.125982	88.2659	0.1
271	L7	si-NC-2	Actin	UNKNOWN	SYBR	None	14.6888	14.4214	0.2532	88.2659	0.1
272	L8	si-NC-2	Actin	UNKNOWN	SYBR	None	14.1854	14.4214	0.2532	88.2659	0.1
273	L9	si-NC-2	Actin	UNKNOWN	SYBR	None	14.3899	14.4214	0.2532	88.1341	0.1
295	M7	si-NC-3	Actin	UNKNOWN	SYBR	None	14.6333	14.4115	0.192741	88.2659	0.1
296	M8	si-NC-3	Actin	UNKNOWN	SYBR	None	14.3164	14.4115	0.192741	88.2659	0.1
297	M9	si-NC-3	Actin	UNKNOWN	SYBR	None	14.2847	14.4115	0.192741	88.2659	0.1
319	N7	si-968-1	Actin	UNKNOWN	SYBR	None	14.4736	14.4113	0.0593033	88.2659	0.1
320	N8	si-968-1	Actin	UNKNOWN	SYBR	None	14.3555	14.4113	0.0593033	88.2659	0.1
321	N9	si-968-1	Actin	UNKNOWN	SYBR	None	14.4049	14.4113	0.0593033	87.8705	0.1
343	O7	si-968-2	Actin	UNKNOWN	SYBR	None	14.6368	14.4335	0.187958	88.2659	0.1
344	O8	si-968-2	Actin	UNKNOWN	SYBR	None	14.266	14.4335	0.187958	88.2659	0.1
345	O9	si-968-2	Actin	UNKNOWN	SYBR	None	14.3976	14.4335	0.187958	88.2659	0.1
367	P7	si-968-3	Actin	UNKNOWN	SYBR	None	14.2338	14.3376	0.226043	88.1341	0.1
368	P8	si-968-3	Actin	UNKNOWN	SYBR	None	14.5969	14.3376	0.226043	88.1341	0.1
369	P9	si-968-3	Actin	UNKNOWN	SYBR	None	14.1821	14.3376	0.226043	87.8705	0.1
253	K13	si-1086-1	Actin	UNKNOWN	SYBR	None	14.5538	14.4891	0.0560124	88.2659	0.1
254	K14	si-1086-1	Actin	UNKNOWN	SYBR	None	14.4545	14.4891	0.0560124	88.2659	0.1
255	K15	si-1086-1	Actin	UNKNOWN	SYBR	None	14.4591	14.4891	0.0560124	88.1341	0.1
277	L13	si-1086-2	Actin	UNKNOWN	SYBR	None	14.6024	14.5039	0.12371	88.2659	0.1
278	L14	si-1086-2	Actin	UNKNOWN	SYBR	None	14.5443	14.5039	0.12371	88.2659	0.1
279	L15	si-1086-2	Actin	UNKNOWN	SYBR	None	14.365	14.5039	0.12371	88.2659	0.1
301	M13	si-1086-3	Actin	UNKNOWN	SYBR	None	14.283	14.5366	0.291758	87.8705	0.1
302	M14	si-1086-3	Actin	UNKNOWN	SYBR	None	14.4713	14.5366	0.291758	88.2659	0.1
303	M15	si-1086-3	Actin	UNKNOWN	SYBR	None	14.8554	14.5366	0.291758	88.2659	0.1
325	N13	si-1604-1	Actin	UNKNOWN	SYBR	None	14.4891	14.4332	0.233256	88.0023	0.1
326	N14	si-1604-1	Actin	UNKNOWN	SYBR	None	14.177	14.4332	0.233256	88.2659	0.1
327	N15	si-1604-1	Actin	UNKNOWN	SYBR	None	14.6333	14.4332	0.233256	88.1341	0.1
349	O13	si-1604-2	Actin	UNKNOWN	SYBR	None	14.2605	14.4484	0.162784	88.2659	0.1
350	O14	si-1604-2	Actin	UNKNOWN	SYBR	None	14.5403	14.4484	0.162784	88.2659	0.1
351	O15	si-1604-2	Actin	UNKNOWN	SYBR	None	14.5445	14.4484	0.162784	88.2659	0.1
373	P13	si-1604-3	Actin	UNKNOWN	SYBR	None	14.3271	14.3225	0.258775	88.0023	0.1
374	P14	si-1604-3	Actin	UNKNOWN	SYBR	None	14.0615	14.3225	0.258775	87.8705	0.1
375	P15	si-1604-3	Actin	UNKNOWN	SYBR	None	14.579	14.3225	0.258775	88.0023	0.1
Analysis Type	Singleplex
Endogenous Control	Actin
RQ Min/Max Confidence Level	95.0
Reference Sample	si-968-1

## Sheet: METTL3
Block Type	384-Well Block
Chemistry	SYBR_GREEN
Experiment Name	2022-01-25 111551 wangli
Experiment Run End Time	2022-01-25 21:37:28 PM CST
Experiment Type	Comparative Cт (ΔΔCт)
Instrument Type	QuantStudio(TM) 6 Flex System
Passive Reference	ROX
Quantification Cycle Method	Ct
Signal Smoothing On	true
Stage/ Cycle where Analysis is performed	Stage 2, Step 2
User Name
Well	Well Position	Sample Name	Target Name	Task	Reporter	Quencher	CT	Ct Mean	Ct SD	Tm1	Ct Threshold
224	J8		METTL3	NTC	SYBR	None	Undetermined			61.1078	0.1
250	K10	si-NC-1	METTL3	UNKNOWN	SYBR	None	22.5028	22.6122	0.101085	82.4665	0.1
251	K11	si-NC-1	METTL3	UNKNOWN	SYBR	None	22.7021	22.6122	0.101085	82.4665	0.1
252	K12	si-NC-1	METTL3	UNKNOWN	SYBR	None	22.6319	22.6122	0.101085	82.4665	0.1
274	L10	si-NC-2	METTL3	UNKNOWN	SYBR	None	22.4225	22.4916	0.311877	82.4665	0.1
275	L11	si-NC-2	METTL3	UNKNOWN	SYBR	None	22.8323	22.4916	0.311877	82.4665	0.1
276	L12	si-NC-2	METTL3	UNKNOWN	SYBR	None	22.2201	22.4916	0.311877	82.4665	0.1
298	M10	si-NC-3	METTL3	UNKNOWN	SYBR	None	22.6541	22.6789	0.0243299	82.4665	0.1
299	M11	si-NC-3	METTL3	UNKNOWN	SYBR	None	22.68	22.6789	0.0243299	82.4665	0.1
300	M12	si-NC-3	METTL3	UNKNOWN	SYBR	None	22.7027	22.6789	0.0243299	82.4665	0.1
322	N10	si-968-1	METTL3	UNKNOWN	SYBR	None	23.2109	23.2299	0.140451	82.4665	0.1
323	N11	si-968-1	METTL3	UNKNOWN	SYBR	None	23.3789	23.2299	0.140451	82.2029	0.1
324	N12	si-968-1	METTL3	UNKNOWN	SYBR	None	23.0999	23.2299	0.140451	82.0711	0.1
346	O10	si-968-2	METTL3	UNKNOWN	SYBR	None	23.1522	23.1981	0.114906	82.4665	0.1
347	O11	si-968-2	METTL3	UNKNOWN	SYBR	None	23.1132	23.1981	0.114906	82.4665	0.1
348	O12	si-968-2	METTL3	UNKNOWN	SYBR	None	23.3288	23.1981	0.114906	82.4665	0.1
370	P10	si-968-3	METTL3	UNKNOWN	SYBR	None	23.3635	23.3409	0.0573456	82.3347	0.1
371	P11	si-968-3	METTL3	UNKNOWN	SYBR	None	23.3835	23.3409	0.0573456	82.3347	0.1
372	P12	si-968-3	METTL3	UNKNOWN	SYBR	None	23.2757	23.3409	0.0573456	82.0711	0.1
256	K16	si-1086-1	METTL3	UNKNOWN	SYBR	None	23.3611	23.279	0.0888762	82.4665	0.1
257	K17	si-1086-1	METTL3	UNKNOWN	SYBR	None	23.2912	23.279	0.0888762	82.3347	0.1
258	K18	si-1086-1	METTL3	UNKNOWN	SYBR	None	23.1846	23.279	0.0888762	82.4665	0.1
280	L16	si-1086-2	METTL3	UNKNOWN	SYBR	None	23.3162	23.3212	0.0482753	82.3347	0.1
281	L17	si-1086-2	METTL3	UNKNOWN	SYBR	None	23.2757	23.3212	0.0482753	82.4665	0.1
282	L18	si-1086-2	METTL3	UNKNOWN	SYBR	None	23.3718	23.3212	0.0482753	82.4665	0.1
304	M16	si-1086-3	METTL3	UNKNOWN	SYBR	None	23.1666	23.1822	0.0139112	82.3347	0.1
305	M17	si-1086-3	METTL3	UNKNOWN	SYBR	None	23.1867	23.1822	0.0139112	82.3347	0.1
306	M18	si-1086-3	METTL3	UNKNOWN	SYBR	None	23.1933	23.1822	0.0139112	82.4665	0.1
328	N16	si-1604-1	METTL3	UNKNOWN	SYBR	None	23.1933	23.1826	0.00942315	82.2029	0.1
329	N17	si-1604-1	METTL3	UNKNOWN	SYBR	None	23.1755	23.1826	0.00942315	82.4665	0.1
330	N18	si-1604-1	METTL3	UNKNOWN	SYBR	None	23.1791	23.1826	0.00942315	82.3347	0.1
352	O16	si-1604-2	METTL3	UNKNOWN	SYBR	None	23.1332	23.1985	0.0852128	82.3347	0.1
353	O17	si-1604-2	METTL3	UNKNOWN	SYBR	None	23.1674	23.1985	0.0852128	82.3347	0.1
354	O18	si-1604-2	METTL3	UNKNOWN	SYBR	None	23.2949	23.1985	0.0852128	82.3347	0.1
376	P16	si-1604-3	METTL3	UNKNOWN	SYBR	None	23.2974	23.3428	0.0695544	81.8075	0.1
377	P17	si-1604-3	METTL3	UNKNOWN	SYBR	None	23.3081	23.3428	0.0695544	82.0711	0.1
378	P18	si-1604-3	METTL3	UNKNOWN	SYBR	None	23.4229	23.3428	0.0695544	82.4665	0.1
Analysis Type	Singleplex
Endogenous Control	Actin
RQ Min/Max Confidence Level	95.0
Reference Sample	si-968-1
