# Supplementary material for: METTL3-mediated m6A modification of has_circ_0007905 promotes age-related cataract progression through miR-6749-3p/EIF4EBP1
Source: PeerJ journal article supplement (doi:10.7717/peerj.14863), 2023-03-06
Supplement: Raw_data.zip [file Realtime PCR raw CT data.xls]

## Sheet: Actin
Block Type	384-Well Block
Chemistry	SYBR_GREEN
Experiment Name	2022-03-25 133332 wangli
Experiment Run End Time	2022-03-25 23:58:28 PM CST
Experiment Type	Comparative Cт (ΔΔCт)
Instrument Type	QuantStudio(TM) 6 Flex System
Passive Reference	ROX
Quantification Cycle Method	Ct
Signal Smoothing On	true
Stage/ Cycle where Analysis is performed	Stage 2, Step 2
User Name
Well	Well Position	Sample Name	Target Name	Task	Reporter	Quencher	CT	Ct Mean	Ct SD	Tm1	Ct Threshold
16	A16	si-NC-1	Actin	UNKNOWN	SYBR	None	15.9835	16.1249	0.250428	88.2709	0.1
17	A17	si-NC-1	Actin	UNKNOWN	SYBR	None	15.9773	16.1249	0.250428	88.2709	0.1
18	A18	si-NC-1	Actin	UNKNOWN	SYBR	None	16.4141	16.1249	0.250428	88.1391	0.1
40	B16	si-NC-2	Actin	UNKNOWN	SYBR	None	16.2849	16.2023	0.082191	88.2709	0.1
41	B17	si-NC-2	Actin	UNKNOWN	SYBR	None	16.2015	16.2023	0.082191	88.2709	0.1
42	B18	si-NC-2	Actin	UNKNOWN	SYBR	None	16.1206	16.2023	0.082191	88.1391	0.1
64	C16	si-NC-3	Actin	UNKNOWN	SYBR	None	15.9263	15.7593	0.323089	88.2709	0.1
65	C17	si-NC-3	Actin	UNKNOWN	SYBR	None	15.9646	15.7593	0.323089	88.2709	0.1
66	C18	si-NC-3	Actin	UNKNOWN	SYBR	None	15.3868	15.7593	0.323089	88.2709	0.1
88	D16	si-circ-0007905-1	Actin	UNKNOWN	SYBR	None	14.9729	15.0393	0.0817738	88.2709	0.1
89	D17	si-circ-0007905-1	Actin	UNKNOWN	SYBR	None	15.0144	15.0393	0.0817738	88.2709	0.1
90	D18	si-circ-0007905-1	Actin	UNKNOWN	SYBR	None	15.1306	15.0393	0.0817738	88.2709	0.1
112	E16	si-circ-0007905-2	Actin	UNKNOWN	SYBR	None	15.4654	15.154	0.414151	88.2709	0.1
113	E17	si-circ-0007905-2	Actin	UNKNOWN	SYBR	None	14.684	15.154	0.414151	88.2709	0.1
114	E18	si-circ-0007905-2	Actin	UNKNOWN	SYBR	None	15.3127	15.154	0.414151	88.2709	0.1
136	F16	si-circ-0007905-3	Actin	UNKNOWN	SYBR	None	15.2073	15.0409	0.177315	88.2709	0.1
137	F17	si-circ-0007905-3	Actin	UNKNOWN	SYBR	None	14.8543	15.0409	0.177315	88.2709	0.1
138	F18	si-circ-0007905-3	Actin	UNKNOWN	SYBR	None	15.061	15.0409	0.177315	88.2709	0.1
334	N22		Actin	NTC	SYBR	None	Undetermined			61.1315	0.1
Analysis Type	Singleplex
Endogenous Control	Actin
RQ Min/Max Confidence Level	95.0
Reference Sample	si-circ-0007905-1

## Sheet: WNT7B
Block Type	384-Well Block
Chemistry	SYBR_GREEN
Experiment Name	2022-03-25 133332 wangli
Experiment Run End Time	2022-03-25 23:58:28 PM CST
Experiment Type	Comparative Cт (ΔΔCт)
Instrument Type	QuantStudio(TM) 6 Flex System
Passive Reference	ROX
Quantification Cycle Method	Ct
Signal Smoothing On	true
Stage/ Cycle where Analysis is performed	Stage 2, Step 2
User Name
Well	Well Position	Sample Name	Target Name	Task	Reporter	Quencher	CT	Ct Mean	Ct SD	Tm1	Ct Threshold
19	A19	si-NC-1	WNT7B	UNKNOWN	SYBR	None	19.1294	19.3074	0.159863	85.6341	0.1
20	A20	si-NC-1	WNT7B	UNKNOWN	SYBR	None	19.3538	19.3074	0.159863	85.6341	0.1
21	A21	si-NC-1	WNT7B	UNKNOWN	SYBR	None	19.4389	19.3074	0.159863	85.5023	0.1
43	B19	si-NC-2	WNT7B	UNKNOWN	SYBR	None	19.4426	19.5614	0.109112	85.6341	0.1
44	B20	si-NC-2	WNT7B	UNKNOWN	SYBR	None	19.6571	19.5614	0.109112	85.6341	0.1
45	B21	si-NC-2	WNT7B	UNKNOWN	SYBR	None	19.5845	19.5614	0.109112	85.6341	0.1
67	C19	si-NC-3	WNT7B	UNKNOWN	SYBR	None	19.4787	19.4619	0.101563	85.6341	0.1
68	C20	si-NC-3	WNT7B	UNKNOWN	SYBR	None	19.3529	19.4619	0.101563	85.6341	0.1
69	C21	si-NC-3	WNT7B	UNKNOWN	SYBR	None	19.554	19.4619	0.101563	85.6341	0.1
91	D19	si-circ-0007905-1	WNT7B	UNKNOWN	SYBR	None	20.6342	20.5599	0.0842151	85.6341	0.1
92	D20	si-circ-0007905-1	WNT7B	UNKNOWN	SYBR	None	20.5771	20.5599	0.0842151	85.6341	0.1
93	D21	si-circ-0007905-1	WNT7B	UNKNOWN	SYBR	None	20.4684	20.5599	0.0842151	85.6341	0.1
115	E19	si-circ-0007905-2	WNT7B	UNKNOWN	SYBR	None	21.1761	20.8461	0.293026	85.6341	0.1
116	E20	si-circ-0007905-2	WNT7B	UNKNOWN	SYBR	None	20.7458	20.8461	0.293026	85.7659	0.1
117	E21	si-circ-0007905-2	WNT7B	UNKNOWN	SYBR	None	20.6164	20.8461	0.293026	85.7659	0.1
139	F19	si-circ-0007905-3	WNT7B	UNKNOWN	SYBR	None	20.6999	20.5987	0.179716	85.6341	0.1
140	F20	si-circ-0007905-3	WNT7B	UNKNOWN	SYBR	None	20.3912	20.5987	0.179716	85.6341	0.1
141	F21	si-circ-0007905-3	WNT7B	UNKNOWN	SYBR	None	20.705	20.5987	0.179716	85.6341	0.1
335	N23		WNT7B	NTC	SYBR	None	Undetermined			61.1491	0.1
Analysis Type	Singleplex
Endogenous Control	Actin
RQ Min/Max Confidence Level	95.0
Reference Sample	si-circ-0007905-1

## Sheet: ARRB1
Block Type	384-Well Block
Chemistry	SYBR_GREEN
Experiment Name	2022-03-25 133332 wangli
Experiment Run End Time	2022-03-25 23:58:28 PM CST
Experiment Type	Comparative Cт (ΔΔCт)
Instrument Type	QuantStudio(TM) 6 Flex System
Passive Reference	ROX
Quantification Cycle Method	Ct
Signal Smoothing On	true
Stage/ Cycle where Analysis is performed	Stage 2, Step 2
User Name
Well	Well Position	Sample Name	Target Name	Task	Reporter	Quencher	CT	Ct Mean	Ct SD	Tm1	Ct Threshold
22	A22	si-NC-1	ARRB1	UNKNOWN	SYBR	None	22.6305	22.8181	0.162583	79.5694	0.1
23	A23	si-NC-1	ARRB1	UNKNOWN	SYBR	None	22.9188	22.8181	0.162583	79.4376	0.1
24	A24	si-NC-1	ARRB1	UNKNOWN	SYBR	None	22.9049	22.8181	0.162583	79.5694	0.1
46	B22	si-NC-2	ARRB1	UNKNOWN	SYBR	None	22.9451	23.0903	0.136525	79.5694	0.1
47	B23	si-NC-2	ARRB1	UNKNOWN	SYBR	None	23.2161	23.0903	0.136525	79.5694	0.1
48	B24	si-NC-2	ARRB1	UNKNOWN	SYBR	None	23.1097	23.0903	0.136525	79.5694	0.1
70	C22	si-NC-3	ARRB1	UNKNOWN	SYBR	None	23.1425	23.0269	0.187652	79.5694	0.1
71	C23	si-NC-3	ARRB1	UNKNOWN	SYBR	None	22.8104	23.0269	0.187652	79.5694	0.1
72	C24	si-NC-3	ARRB1	UNKNOWN	SYBR	None	23.1279	23.0269	0.187652	79.5694	0.1
94	D22	si-circ-0007905-1	ARRB1	UNKNOWN	SYBR	None	24.0985	23.884	0.189499	79.5694	0.1
95	D23	si-circ-0007905-1	ARRB1	UNKNOWN	SYBR	None	23.814	23.884	0.189499	79.5694	0.1
96	D24	si-circ-0007905-1	ARRB1	UNKNOWN	SYBR	None	23.7394	23.884	0.189499	79.7012	0.1
118	E22	si-circ-0007905-2	ARRB1	UNKNOWN	SYBR	None	23.5616	23.6449	0.225369	79.5694	0.1
119	E23	si-circ-0007905-2	ARRB1	UNKNOWN	SYBR	None	23.9	23.6449	0.225369	79.7012	0.1
120	E24	si-circ-0007905-2	ARRB1	UNKNOWN	SYBR	None	23.473	23.6449	0.225369	79.7012	0.1
142	F22	si-circ-0007905-3	ARRB1	UNKNOWN	SYBR	None	23.639	23.7814	0.330457	79.7012	0.1
143	F23	si-circ-0007905-3	ARRB1	UNKNOWN	SYBR	None	24.1592	23.7814	0.330457	79.7012	0.1
144	F24	si-circ-0007905-3	ARRB1	UNKNOWN	SYBR	None	23.5461	23.7814	0.330457	79.7012	0.1
336	N24		ARRB1	NTC	SYBR	None	Undetermined			61.0892	0.1
Analysis Type	Singleplex
Endogenous Control	Actin
RQ Min/Max Confidence Level	95.0
Reference Sample	si-circ-0007905-1

## Sheet: ARRB2
Block Type	384-Well Block
Chemistry	SYBR_GREEN
Experiment Name	2022-03-25 133332 wangli
Experiment Run End Time	2022-03-25 23:58:28 PM CST
Experiment Type	Comparative Cт (ΔΔCт)
Instrument Type	QuantStudio(TM) 6 Flex System
Passive Reference	ROX
Quantification Cycle Method	Ct
Signal Smoothing On	true
Stage/ Cycle where Analysis is performed	Stage 2, Step 2
User Name
Well	Well Position	Sample Name	Target Name	Task	Reporter	Quencher	CT	Ct Mean	Ct SD	Tm1	Ct Threshold
160	G16	si-NC-1	ARRB2	UNKNOWN	SYBR	None	21.6498	21.5378	0.0994107	79.9649	0.1
161	G17	si-NC-1	ARRB2	UNKNOWN	SYBR	None	21.5033	21.5378	0.0994107	80.0968	0.1
162	G18	si-NC-1	ARRB2	UNKNOWN	SYBR	None	21.4601	21.5378	0.0994107	80.0968	0.1
184	H16	si-NC-2	ARRB2	UNKNOWN	SYBR	None	21.4941	21.6376	0.129387	80.0968	0.1
185	H17	si-NC-2	ARRB2	UNKNOWN	SYBR	None	21.6735	21.6376	0.129387	80.0968	0.1
186	H18	si-NC-2	ARRB2	UNKNOWN	SYBR	None	21.7453	21.6376	0.129387	80.0968	0.1
208	I16	si-NC-3	ARRB2	UNKNOWN	SYBR	None	21.5495	21.5128	0.03364	80.0968	0.1
209	I17	si-NC-3	ARRB2	UNKNOWN	SYBR	None	21.5054	21.5128	0.03364	80.0968	0.1
210	I18	si-NC-3	ARRB2	UNKNOWN	SYBR	None	21.4835	21.5128	0.03364	80.0968	0.1
232	J16	si-circ-0007905-1	ARRB2	UNKNOWN	SYBR	None	22.2346	22.4178	0.290103	80.0968	0.1
233	J17	si-circ-0007905-1	ARRB2	UNKNOWN	SYBR	None	22.2665	22.4178	0.290103	80.0968	0.1
234	J18	si-circ-0007905-1	ARRB2	UNKNOWN	SYBR	None	22.7523	22.4178	0.290103	80.0968	0.1
256	K16	si-circ-0007905-2	ARRB2	UNKNOWN	SYBR	None	22.1277	22.3657	0.303722	80.0968	0.1
257	K17	si-circ-0007905-2	ARRB2	UNKNOWN	SYBR	None	22.2617	22.3657	0.303722	80.0968	0.1
258	K18	si-circ-0007905-2	ARRB2	UNKNOWN	SYBR	None	22.7078	22.3657	0.303722	80.0968	0.1
280	L16	si-circ-0007905-3	ARRB2	UNKNOWN	SYBR	None	22.3097	22.5268	0.19109	80.0968	0.1
281	L17	si-circ-0007905-3	ARRB2	UNKNOWN	SYBR	None	22.6009	22.5268	0.19109	80.0968	0.1
282	L18	si-circ-0007905-3	ARRB2	UNKNOWN	SYBR	None	22.6697	22.5268	0.19109	80.0968	0.1
358	O22		ARRB2	NTC	SYBR	None	Undetermined			61.2809	0.1
Analysis Type	Singleplex
Endogenous Control	Actin
RQ Min/Max Confidence Level	95.0
Reference Sample	si-circ-0007905-1

## Sheet: EIF4EBP1
Block Type	384-Well Block
Chemistry	SYBR_GREEN
Experiment Name	2022-03-25 133332 wangli
Experiment Run End Time	2022-03-25 23:58:28 PM CST
Experiment Type	Comparative Cт (ΔΔCт)
Instrument Type	QuantStudio(TM) 6 Flex System
Passive Reference	ROX
Quantification Cycle Method	Ct
Signal Smoothing On	true
Stage/ Cycle where Analysis is performed	Stage 2, Step 2
User Name
Well	Well Position	Sample Name	Target Name	Task	Reporter	Quencher	CT	Ct Mean	Ct SD	Tm1	Ct Threshold
163	G19	si-NC-1	EIF4EBP1	UNKNOWN	SYBR	None	18.4311	18.259	0.229533	83.3928	0.1
164	G20	si-NC-1	EIF4EBP1	UNKNOWN	SYBR	None	17.9984	18.259	0.229533	83.3928	0.1
165	G21	si-NC-1	EIF4EBP1	UNKNOWN	SYBR	None	18.3474	18.259	0.229533	83.3928	0.1
187	H19	si-NC-2	EIF4EBP1	UNKNOWN	SYBR	None	18.6021	18.3754	0.339354	83.3928	0.1
188	H20	si-NC-2	EIF4EBP1	UNKNOWN	SYBR	None	17.9853	18.3754	0.339354	83.3928	0.1
189	H21	si-NC-2	EIF4EBP1	UNKNOWN	SYBR	None	18.5388	18.3754	0.339354	83.5246	0.1
211	I19	si-NC-3	EIF4EBP1	UNKNOWN	SYBR	None	18.4224	18.3913	0.122538	83.3928	0.1
212	I20	si-NC-3	EIF4EBP1	UNKNOWN	SYBR	None	18.2562	18.3913	0.122538	83.3928	0.1
213	I21	si-NC-3	EIF4EBP1	UNKNOWN	SYBR	None	18.4953	18.3913	0.122538	83.5246	0.1
235	J19	si-circ-0007905-1	EIF4EBP1	UNKNOWN	SYBR	None	19.8692	19.7205	0.13483	83.3928	0.1
236	J20	si-circ-0007905-1	EIF4EBP1	UNKNOWN	SYBR	None	19.6861	19.7205	0.13483	83.3928	0.1
237	J21	si-circ-0007905-1	EIF4EBP1	UNKNOWN	SYBR	None	19.6062	19.7205	0.13483	83.5246	0.1
259	K19	si-circ-0007905-2	EIF4EBP1	UNKNOWN	SYBR	None	19.9032	19.7267	0.199315	83.3928	0.1
260	K20	si-circ-0007905-2	EIF4EBP1	UNKNOWN	SYBR	None	19.7665	19.7267	0.199315	83.3928	0.1
261	K21	si-circ-0007905-2	EIF4EBP1	UNKNOWN	SYBR	None	19.5106	19.7267	0.199315	83.3928	0.1
283	L19	si-circ-0007905-3	EIF4EBP1	UNKNOWN	SYBR	None	19.573	19.6826	0.107628	83.3928	0.1
284	L20	si-circ-0007905-3	EIF4EBP1	UNKNOWN	SYBR	None	19.7882	19.6826	0.107628	83.3928	0.1
285	L21	si-circ-0007905-3	EIF4EBP1	UNKNOWN	SYBR	None	19.6866	19.6826	0.107628	83.3928	0.1
359	O23		EIF4EBP1	NTC	SYBR	None	Undetermined			61.1639	0.1
Analysis Type	Singleplex
Endogenous Control	Actin
RQ Min/Max Confidence Level	95.0
Reference Sample	si-circ-0007905-1

## Sheet: FRAT1
Block Type	384-Well Block
Chemistry	SYBR_GREEN
Experiment Name	2022-03-25 133332 wangli
Experiment Run End Time	2022-03-25 23:58:28 PM CST
Experiment Type	Comparative Cт (ΔΔCт)
Instrument Type	QuantStudio(TM) 6 Flex System
Passive Reference	ROX
Quantification Cycle Method	Ct
Signal Smoothing On	true
Stage/ Cycle where Analysis is performed	Stage 2, Step 2
User Name
Well	Well Position	Sample Name	Target Name	Task	Reporter	Quencher	CT	Ct Mean	Ct SD	Tm1	Ct Threshold
166	G22	si-NC-1	FRAT1	UNKNOWN	SYBR	None	25.6039	25.5909	0.0751829	88.2709	0.1
167	G23	si-NC-1	FRAT1	UNKNOWN	SYBR	None	25.5101	25.5909	0.0751829	88.1391	0.1
168	G24	si-NC-1	FRAT1	UNKNOWN	SYBR	None	25.6588	25.5909	0.0751829	88.1391	0.1
190	H22	si-NC-2	FRAT1	UNKNOWN	SYBR	None	25.6764	25.803	0.325153	88.2709	0.1
191	H23	si-NC-2	FRAT1	UNKNOWN	SYBR	None	25.5601	25.803	0.325153	88.1391	0.1
192	H24	si-NC-2	FRAT1	UNKNOWN	SYBR	None	26.1724	25.803	0.325153	88.1391	0.1
214	I22	si-NC-3	FRAT1	UNKNOWN	SYBR	None	25.8716	25.7924	0.188164	88.2709	0.1
215	I23	si-NC-3	FRAT1	UNKNOWN	SYBR	None	25.5776	25.7924	0.188164	88.1391	0.1
216	I24	si-NC-3	FRAT1	UNKNOWN	SYBR	None	25.9281	25.7924	0.188164	88.1391	0.1
238	J22	si-circ-0007905-1	FRAT1	UNKNOWN	SYBR	None	26.6891	26.7245	0.167443	88.2709	0.1
239	J23	si-circ-0007905-1	FRAT1	UNKNOWN	SYBR	None	26.5777	26.7245	0.167443	88.1391	0.1
240	J24	si-circ-0007905-1	FRAT1	UNKNOWN	SYBR	None	26.9069	26.7245	0.167443	88.1391	0.1
262	K22	si-circ-0007905-2	FRAT1	UNKNOWN	SYBR	None	26.7513	26.7032	0.145292	88.1391	0.1
263	K23	si-circ-0007905-2	FRAT1	UNKNOWN	SYBR	None	26.5399	26.7032	0.145292	88.1391	0.1
264	K24	si-circ-0007905-2	FRAT1	UNKNOWN	SYBR	None	26.8183	26.7032	0.145292	88.1391	0.1
286	L22	si-circ-0007905-3	FRAT1	UNKNOWN	SYBR	None	26.5082	26.7962	0.251778	88.1391	0.1
287	L23	si-circ-0007905-3	FRAT1	UNKNOWN	SYBR	None	26.975	26.7962	0.251778	88.1391	0.1
288	L24	si-circ-0007905-3	FRAT1	UNKNOWN	SYBR	None	26.9053	26.7962	0.251778	88.1391	0.1
360	O24		FRAT1	NTC	SYBR	None	Undetermined			61.6142	0.1
Analysis Type	Singleplex
Endogenous Control	Actin
RQ Min/Max Confidence Level	95.0
Reference Sample	si-circ-0007905-1

## Sheet: PDGFD
Block Type	384-Well Block
Chemistry	SYBR_GREEN
Experiment Name	2022-03-25 133332 wangli
Experiment Run End Time	2022-03-25 23:58:28 PM CST
Experiment Type	Comparative Cт (ΔΔCт)
Instrument Type	QuantStudio(TM) 6 Flex System
Passive Reference	ROX
Quantification Cycle Method	Ct
Signal Smoothing On	true
Stage/ Cycle where Analysis is performed	Stage 2, Step 2
User Name
Well	Well Position	Sample Name	Target Name	Task	Reporter	Quencher	CT	Ct Mean	Ct SD	Tm1	Ct Threshold
304	M16	si-NC-1	PDGFD	UNKNOWN	SYBR	None	21.7464	21.7551	0.0661616	74.1639	0.1
305	M17	si-NC-1	PDGFD	UNKNOWN	SYBR	None	21.6937	21.7551	0.0661616	74.1639	0.1
306	M18	si-NC-1	PDGFD	UNKNOWN	SYBR	None	21.8252	21.7551	0.0661616	74.1639	0.1
328	N16	si-NC-2	PDGFD	UNKNOWN	SYBR	None	21.8579	21.8177	0.0802625	73.5047	0.1
329	N17	si-NC-2	PDGFD	UNKNOWN	SYBR	None	21.7253	21.8177	0.0802625	74.1639	0.1
330	N18	si-NC-2	PDGFD	UNKNOWN	SYBR	None	21.87	21.8177	0.0802625	74.1639	0.1
352	O16	si-NC-3	PDGFD	UNKNOWN	SYBR	None	21.8472	21.9557	0.174409	74.1639	0.1
353	O17	si-NC-3	PDGFD	UNKNOWN	SYBR	None	21.863	21.9557	0.174409	73.7684	0.1
354	O18	si-NC-3	PDGFD	UNKNOWN	SYBR	None	22.1569	21.9557	0.174409	74.0321	0.1
307	M19	si-circ-0007905-2	PDGFD	UNKNOWN	SYBR	None	22.3177	22.5365	0.1905	74.1639	0.1
308	M20	si-circ-0007905-2	PDGFD	UNKNOWN	SYBR	None	22.6262	22.5365	0.1905	73.6365	0.1
309	M21	si-circ-0007905-2	PDGFD	UNKNOWN	SYBR	None	22.6656	22.5365	0.1905	74.1639	0.1
331	N19	si-circ-0007905-3	PDGFD	UNKNOWN	SYBR	None	22.56	22.5311	0.0485715	73.9002	0.1
332	N20	si-circ-0007905-3	PDGFD	UNKNOWN	SYBR	None	22.475	22.5311	0.0485715	74.0321	0.1
333	N21	si-circ-0007905-3	PDGFD	UNKNOWN	SYBR	None	22.5582	22.5311	0.0485715	74.1639	0.1
376	P16	si-circ-0007905-1	PDGFD	UNKNOWN	SYBR	None	22.1473	22.3527	0.178103	73.3728	0.1
377	P17	si-circ-0007905-1	PDGFD	UNKNOWN	SYBR	None	22.4454	22.3527	0.178103	73.9002	0.1
378	P18	si-circ-0007905-1	PDGFD	UNKNOWN	SYBR	None	22.4652	22.3527	0.178103	74.1639	0.1
382	P22		PDGFD	NTC	SYBR	None	Undetermined			61.2136	0.1
Analysis Type	Singleplex
Endogenous Control	Actin
RQ Min/Max Confidence Level	95.0
Reference Sample	si-circ-0007905-1
