# Supplementary material for: METTL3-mediated m6A modification of has_circ_0007905 promotes age-related cataract progression through miR-6749-3p/EIF4EBP1
Source: PeerJ journal article supplement (doi:10.7717/peerj.14863), 2023-03-06
Supplement: Raw_data.zip [file Realtime PCR raw CT data.xls.xls]

## Sheet: U6
Block Type	384-Well Block
Chemistry	SYBR_GREEN
Experiment Name	2022-04-28 134123 wangli zhonghua wumeini
Experiment Run End Time	2022-04-28 23:56:06 PM CST
Experiment Type	Comparative Cт (ΔΔCт)
Instrument Type	QuantStudio(TM) 6 Flex System
Passive Reference	ROX
Quantification Cycle Method	Ct
Signal Smoothing On	true
Stage/ Cycle where Analysis is performed	Stage 2, Step 2
User Name
Well	Well Position	Sample Name	Target Name	Task	Reporter	CT	Ct Mean	Ct SD	Tm1	Ct Threshold
1	A1	Si NC-1	U6	UNKNOWN	SYBR	9.5192	9.45724	0.200335	77.0163	0.1
2	A2	Si NC-1	U6	UNKNOWN	SYBR	9.61928	9.45724	0.200335	77.0163	0.1
3	A3	Si NC-1	U6	UNKNOWN	SYBR	9.23325	9.45724	0.200335	77.1478	0.1
25	B1	Si NC-2	U6	UNKNOWN	SYBR	9.43129	9.54766	0.108251	77.1478	0.1
26	B2	Si NC-2	U6	UNKNOWN	SYBR	9.56633	9.54766	0.108251	77.1478	0.1
27	B3	Si NC-2	U6	UNKNOWN	SYBR	9.64536	9.54766	0.108251	77.1478	0.1
49	C1	Si NC-3	U6	UNKNOWN	SYBR	9.78556	9.64618	0.126578	77.0163	0.1
50	C2	Si NC-3	U6	UNKNOWN	SYBR	9.53837	9.64618	0.126578	77.1478	0.1
51	C3	Si NC-3	U6	UNKNOWN	SYBR	9.61462	9.64618	0.126578	77.1478	0.1
73	D1	Si circ7905-1	U6	UNKNOWN	SYBR	9.39126	9.41389	0.110465	77.1478	0.1
74	D2	Si circ7905-1	U6	UNKNOWN	SYBR	9.3165	9.41389	0.110465	77.1478	0.1
75	D3	Si circ7905-1	U6	UNKNOWN	SYBR	9.53392	9.41389	0.110465	77.2792	0.1
97	E1	Si circ7905-2	U6	UNKNOWN	SYBR	9.64189	9.54257	0.111399	77.1478	0.1
98	E2	Si circ7905-2	U6	UNKNOWN	SYBR	9.56371	9.54257	0.111399	77.2792	0.1
99	E3	Si circ7905-2	U6	UNKNOWN	SYBR	9.42212	9.54257	0.111399	77.2792	0.1
121	F1	Si circ7905-3	U6	UNKNOWN	SYBR	9.53546	9.44862	0.0922782	77.2792	0.1
122	F2	Si circ7905-3	U6	UNKNOWN	SYBR	9.35173	9.44862	0.0922782	77.2792	0.1
123	F3	Si circ7905-3	U6	UNKNOWN	SYBR	9.45868	9.44862	0.0922782	77.2792	0.1
145	G1		U6	NTC	SYBR	Undetermined			61.0628	0.1
Analysis Type	Singleplex
Endogenous Control	U6
RQ Min/Max Confidence Level	95.0
Reference Sample	Si NC-2

## Sheet: miR-4707-5P
Block Type	384-Well Block
Chemistry	SYBR_GREEN
Experiment Name	2022-04-28 134123 wangli zhonghua wumeini
Experiment Run End Time	2022-04-28 23:56:06 PM CST
Experiment Type	Comparative Cт (ΔΔCт)
Instrument Type	QuantStudio(TM) 6 Flex System
Passive Reference	ROX
Quantification Cycle Method	Ct
Signal Smoothing On	true
Stage/ Cycle where Analysis is performed	Stage 2, Step 2
User Name
Well	Well Position	Sample Name	Target Name	Task	Reporter	CT	Ct Mean	Ct SD	Tm1	Ct Threshold
4	A4	Si NC-1	miR-4707-5P	UNKNOWN	SYBR	27.423	27.57	0.198479	85.2974	0.1
5	A5	Si NC-1	miR-4707-5P	UNKNOWN	SYBR	27.4912	27.57	0.198479	85.4289	0.1
6	A6	Si NC-1	miR-4707-5P	UNKNOWN	SYBR	27.7957	27.57	0.198479	82.0113	0.1
28	B4	Si NC-2	miR-4707-5P	UNKNOWN	SYBR	27.25	27.3961	0.178284	85.4289	0.1
29	B5	Si NC-2	miR-4707-5P	UNKNOWN	SYBR	27.3437	27.3961	0.178284	85.6918	0.1
30	B6	Si NC-2	miR-4707-5P	UNKNOWN	SYBR	27.5948	27.3961	0.178284	82.2742	0.1
52	C4	Si NC-3	miR-4707-5P	UNKNOWN	SYBR	27.7013	27.8076	0.237397	85.6918	0.1
53	C5	Si NC-3	miR-4707-5P	UNKNOWN	SYBR	28.0796	27.8076	0.237397	87.2691	0.1
54	C6	Si NC-3	miR-4707-5P	UNKNOWN	SYBR	27.6419	27.8076	0.237397	82.1427	0.1
76	D4	Si circ7905-1	miR-4707-5P	UNKNOWN	SYBR	27.9211	27.7505	0.150016	81.8798	0.1
77	D5	Si circ7905-1	miR-4707-5P	UNKNOWN	SYBR	27.6391	27.7505	0.150016	81.8798	0.1
78	D6	Si circ7905-1	miR-4707-5P	UNKNOWN	SYBR	27.6913	27.7505	0.150016	85.5603	0.1
100	E4	Si circ7905-2	miR-4707-5P	UNKNOWN	SYBR	27.7663	27.5449	0.35527	82.0113	0.1
101	E5	Si circ7905-2	miR-4707-5P	UNKNOWN	SYBR	27.1351	27.5449	0.35527	87.2691	0.1
102	E6	Si circ7905-2	miR-4707-5P	UNKNOWN	SYBR	27.7334	27.5449	0.35527	85.4289	0.1
124	F4	Si circ7905-3	miR-4707-5P	UNKNOWN	SYBR	27.6909	27.7738	0.430758	85.4289	0.1
125	F5	Si circ7905-3	miR-4707-5P	UNKNOWN	SYBR	27.3905	27.7738	0.430758	85.2974	0.1
126	F6	Si circ7905-3	miR-4707-5P	UNKNOWN	SYBR	28.2399	27.7738	0.430758	82.1427	0.1
146	G2		miR-4707-5P	NTC	SYBR	Undetermined			61.7099	0.1
Analysis Type	Singleplex
Endogenous Control	U6
RQ Min/Max Confidence Level	95.0
Reference Sample	Si NC-2

## Sheet: miR-6749-3P
Block Type	384-Well Block
Chemistry	SYBR_GREEN
Experiment Name	2022-04-28 134123 wangli zhonghua wumeini
Experiment Run End Time	2022-04-28 23:56:06 PM CST
Experiment Type	Comparative Cт (ΔΔCт)
Instrument Type	QuantStudio(TM) 6 Flex System
Passive Reference	ROX
Quantification Cycle Method	Ct
Signal Smoothing On	true
Stage/ Cycle where Analysis is performed	Stage 2, Step 2
User Name
Well	Well Position	Sample Name	Target Name	Task	Reporter	CT	Ct Mean	Ct SD	Tm1	Ct Threshold
7	A7	Si NC-1	miR-6749-3P	UNKNOWN	SYBR	24.646	24.7318	0.075911	82.1427	0.1
8	A8	Si NC-1	miR-6749-3P	UNKNOWN	SYBR	24.7595	24.7318	0.075911	82.0113	0.1
9	A9	Si NC-1	miR-6749-3P	UNKNOWN	SYBR	24.79	24.7318	0.075911	82.1427	0.1
31	B7	Si NC-2	miR-6749-3P	UNKNOWN	SYBR	24.6901	24.7248	0.13921	82.1427	0.1
32	B8	Si NC-2	miR-6749-3P	UNKNOWN	SYBR	24.6063	24.7248	0.13921	82.1427	0.1
33	B9	Si NC-2	miR-6749-3P	UNKNOWN	SYBR	24.8781	24.7248	0.13921	82.2742	0.1
55	C7	Si NC-3	miR-6749-3P	UNKNOWN	SYBR	24.8292	24.8323	0.0494946	82.1427	0.1
56	C8	Si NC-3	miR-6749-3P	UNKNOWN	SYBR	24.7844	24.8323	0.0494946	82.1427	0.1
57	C9	Si NC-3	miR-6749-3P	UNKNOWN	SYBR	24.8833	24.8323	0.0494946	82.2742	0.1
79	D7	Si circ7905-1	miR-6749-3P	UNKNOWN	SYBR	24.9077	24.9547	0.133492	82.1427	0.1
80	D8	Si circ7905-1	miR-6749-3P	UNKNOWN	SYBR	24.851	24.9547	0.133492	82.1427	0.1
81	D9	Si circ7905-1	miR-6749-3P	UNKNOWN	SYBR	25.1053	24.9547	0.133492	82.2742	0.1
103	E7	Si circ7905-2	miR-6749-3P	UNKNOWN	SYBR	24.8773	24.8671	0.0239712	82.1427	0.1
104	E8	Si circ7905-2	miR-6749-3P	UNKNOWN	SYBR	24.8843	24.8671	0.0239712	82.1427	0.1
105	E9	Si circ7905-2	miR-6749-3P	UNKNOWN	SYBR	24.8398	24.8671	0.0239712	82.1427	0.1
127	F7	Si circ7905-3	miR-6749-3P	UNKNOWN	SYBR	24.9741	24.9455	0.0250665	82.1427	0.1
128	F8	Si circ7905-3	miR-6749-3P	UNKNOWN	SYBR	24.9275	24.9455	0.0250665	82.2742	0.1
129	F9	Si circ7905-3	miR-6749-3P	UNKNOWN	SYBR	24.9348	24.9455	0.0250665	82.2742	0.1
147	G3		miR-6749-3P	NTC	SYBR	Undetermined			80.8283	0.1
Analysis Type	Singleplex
Endogenous Control	U6
RQ Min/Max Confidence Level	95.0
Reference Sample	Si NC-2

## Sheet: miR-4783-3P
Block Type	384-Well Block
Chemistry	SYBR_GREEN
Experiment Name	2022-04-28 134123 wangli zhonghua wumeini
Experiment Run End Time	2022-04-28 23:56:06 PM CST
Experiment Type	Comparative Cт (ΔΔCт)
Instrument Type	QuantStudio(TM) 6 Flex System
Passive Reference	ROX
Quantification Cycle Method	Ct
Signal Smoothing On	true
Stage/ Cycle where Analysis is performed	Stage 2, Step 2
User Name
Well	Well Position	Sample Name	Target Name	Task	Reporter	CT	Ct Mean	Ct SD	Tm1	Ct Threshold
10	A10	Si NC-1	miR-4783-3P	UNKNOWN	SYBR	25.3207	25.4249	0.0907787	79.3824	0.1
11	A11	Si NC-1	miR-4783-3P	UNKNOWN	SYBR	25.4676	25.4249	0.0907787	79.2509	0.1
12	A12	Si NC-1	miR-4783-3P	UNKNOWN	SYBR	25.4865	25.4249	0.0907787	79.2509	0.1
34	B10	Si NC-2	miR-4783-3P	UNKNOWN	SYBR	25.5852	25.5714	0.0161074	79.2509	0.1
35	B11	Si NC-2	miR-4783-3P	UNKNOWN	SYBR	25.5752	25.5714	0.0161074	79.2509	0.1
36	B12	Si NC-2	miR-4783-3P	UNKNOWN	SYBR	25.5537	25.5714	0.0161074	79.2509	0.1
58	C10	Si NC-3	miR-4783-3P	UNKNOWN	SYBR	25.6231	25.6267	0.0684345	79.3824	0.1
59	C11	Si NC-3	miR-4783-3P	UNKNOWN	SYBR	25.6969	25.6267	0.0684345	79.2509	0.1
60	C12	Si NC-3	miR-4783-3P	UNKNOWN	SYBR	25.5602	25.6267	0.0684345	79.2509	0.1
82	D10	Si circ7905-1	miR-4783-3P	UNKNOWN	SYBR	25.5727	25.5001	0.107397	79.2509	0.1
83	D11	Si circ7905-1	miR-4783-3P	UNKNOWN	SYBR	25.5508	25.5001	0.107397	79.2509	0.1
84	D12	Si circ7905-1	miR-4783-3P	UNKNOWN	SYBR	25.3767	25.5001	0.107397	79.2509	0.1
106	E10	Si circ7905-2	miR-4783-3P	UNKNOWN	SYBR	25.4706	25.5225	0.0477484	79.2509	0.1
107	E11	Si circ7905-2	miR-4783-3P	UNKNOWN	SYBR	25.5325	25.5225	0.0477484	79.2509	0.1
108	E12	Si circ7905-2	miR-4783-3P	UNKNOWN	SYBR	25.5645	25.5225	0.0477484	79.2509	0.1
130	F10	Si circ7905-3	miR-4783-3P	UNKNOWN	SYBR	25.5164	25.7236	0.197844	79.2509	0.1
131	F11	Si circ7905-3	miR-4783-3P	UNKNOWN	SYBR	25.7438	25.7236	0.197844	79.2509	0.1
132	F12	Si circ7905-3	miR-4783-3P	UNKNOWN	SYBR	25.9105	25.7236	0.197844	79.3824	0.1
148	G4		miR-4783-3P	NTC	SYBR	Undetermined			61.7353	0.1
Analysis Type	Singleplex
Endogenous Control	U6
RQ Min/Max Confidence Level	95.0
Reference Sample	Si NC-2

## Sheet: miR-10396a-3P
Block Type	384-Well Block
Chemistry	SYBR_GREEN
Experiment Name	2022-04-28 134123 wangli zhonghua wumeini
Experiment Run End Time	2022-04-28 23:56:06 PM CST
Experiment Type	Comparative Cт (ΔΔCт)
Instrument Type	QuantStudio(TM) 6 Flex System
Passive Reference	ROX
Quantification Cycle Method	Ct
Signal Smoothing On	true
Stage/ Cycle where Analysis is performed	Stage 2, Step 2
User Name
Well	Well Position	Sample Name	Target Name	Task	Reporter	CT	Ct Mean	Ct SD	Tm1	Ct Threshold
13	A13	Si NC-1	miR-10396a-3P	UNKNOWN	SYBR	24.4803	24.4789	0.0730672	85.5603	0.1
14	A14	Si NC-1	miR-10396a-3P	UNKNOWN	SYBR	24.5513	24.4789	0.0730672	85.6918	0.1
15	A15	Si NC-1	miR-10396a-3P	UNKNOWN	SYBR	24.4052	24.4789	0.0730672	85.8232	0.1
37	B13	Si NC-2	miR-10396a-3P	UNKNOWN	SYBR	24.5203	24.3789	0.153089	85.6918	0.1
38	B14	Si NC-2	miR-10396a-3P	UNKNOWN	SYBR	24.3999	24.3789	0.153089	85.6918	0.1
39	B15	Si NC-2	miR-10396a-3P	UNKNOWN	SYBR	24.2163	24.3789	0.153089	85.8232	0.1
61	C13	Si NC-3	miR-10396a-3P	UNKNOWN	SYBR	23.8041	24.0418	0.214222	85.8232	0.1
62	C14	Si NC-3	miR-10396a-3P	UNKNOWN	SYBR	24.22	24.0418	0.214222	85.6918	0.1
63	C15	Si NC-3	miR-10396a-3P	UNKNOWN	SYBR	24.1012	24.0418	0.214222	85.8232	0.1
85	D13	Si circ7905-1	miR-10396a-3P	UNKNOWN	SYBR	24.1397	24.2524	0.0985643	85.6918	0.1
86	D14	Si circ7905-1	miR-10396a-3P	UNKNOWN	SYBR	24.2949	24.2524	0.0985643	85.6918	0.1
87	D15	Si circ7905-1	miR-10396a-3P	UNKNOWN	SYBR	24.3226	24.2524	0.0985643	85.6918	0.1
109	E13	Si circ7905-2	miR-10396a-3P	UNKNOWN	SYBR	24.385	24.2608	0.145528	85.6918	0.1
110	E14	Si circ7905-2	miR-10396a-3P	UNKNOWN	SYBR	24.2966	24.2608	0.145528	85.5603	0.1
111	E15	Si circ7905-2	miR-10396a-3P	UNKNOWN	SYBR	24.1007	24.2608	0.145528	85.6918	0.1
133	F13	Si circ7905-3	miR-10396a-3P	UNKNOWN	SYBR	24.518	24.5232	0.112211	85.5603	0.1
134	F14	Si circ7905-3	miR-10396a-3P	UNKNOWN	SYBR	24.6379	24.5232	0.112211	85.6918	0.1
135	F15	Si circ7905-3	miR-10396a-3P	UNKNOWN	SYBR	24.4137	24.5232	0.112211	85.5603	0.1
149	G5		miR-10396a-3P	NTC	SYBR	Undetermined			61.6321	0.1
Analysis Type	Singleplex
Endogenous Control	U6
RQ Min/Max Confidence Level	95.0
Reference Sample	Si NC-2

## Sheet: miR-10396b-3P
Block Type	384-Well Block
Chemistry	SYBR_GREEN
Experiment Name	2022-04-28 134123 wangli zhonghua wumeini
Experiment Run End Time	2022-04-28 23:56:06 PM CST
Experiment Type	Comparative Cт (ΔΔCт)
Instrument Type	QuantStudio(TM) 6 Flex System
Passive Reference	ROX
Quantification Cycle Method	Ct
Signal Smoothing On	true
Stage/ Cycle where Analysis is performed	Stage 2, Step 2
User Name
Well	Well Position	Sample Name	Target Name	Task	Reporter	CT	Ct Mean	Ct SD	Tm1	Ct Threshold
16	A16	Si NC-1	miR-10396b-3P	UNKNOWN	SYBR	24.1888	24.183	0.179075	85.5603	0.1
17	A17	Si NC-1	miR-10396b-3P	UNKNOWN	SYBR	24.0011	24.183	0.179075	85.5603	0.1
18	A18	Si NC-1	miR-10396b-3P	UNKNOWN	SYBR	24.3591	24.183	0.179075	85.6918	0.1
40	B16	Si NC-2	miR-10396b-3P	UNKNOWN	SYBR	23.8384	23.9147	0.173917	85.6918	0.1
41	B17	Si NC-2	miR-10396b-3P	UNKNOWN	SYBR	24.1137	23.9147	0.173917	85.8232	0.1
42	B18	Si NC-2	miR-10396b-3P	UNKNOWN	SYBR	23.7919	23.9147	0.173917	85.6918	0.1
64	C16	Si NC-3	miR-10396b-3P	UNKNOWN	SYBR	24.0816	24.0753	0.0565613	85.5603	0.1
65	C17	Si NC-3	miR-10396b-3P	UNKNOWN	SYBR	24.1284	24.0753	0.0565613	85.4289	0.1
66	C18	Si NC-3	miR-10396b-3P	UNKNOWN	SYBR	24.0158	24.0753	0.0565613	85.5603	0.1
88	D16	Si circ7905-1	miR-10396b-3P	UNKNOWN	SYBR	24.0232	24.0004	0.0223082	85.6918	0.1
89	D17	Si circ7905-1	miR-10396b-3P	UNKNOWN	SYBR	23.9993	24.0004	0.0223082	85.6918	0.1
90	D18	Si circ7905-1	miR-10396b-3P	UNKNOWN	SYBR	23.9786	24.0004	0.0223082	85.5603	0.1
112	E16	Si circ7905-2	miR-10396b-3P	UNKNOWN	SYBR	23.9831	24.0514	0.205428	85.5603	0.1
113	E17	Si circ7905-2	miR-10396b-3P	UNKNOWN	SYBR	23.8888	24.0514	0.205428	85.5603	0.1
114	E18	Si circ7905-2	miR-10396b-3P	UNKNOWN	SYBR	24.2823	24.0514	0.205428	85.5603	0.1
136	F16	Si circ7905-3	miR-10396b-3P	UNKNOWN	SYBR	23.8144	24.0213	0.193287	85.4289	0.1
137	F17	Si circ7905-3	miR-10396b-3P	UNKNOWN	SYBR	24.1972	24.0213	0.193287	85.6918	0.1
138	F18	Si circ7905-3	miR-10396b-3P	UNKNOWN	SYBR	24.0525	24.0213	0.193287	85.4289	0.1
150	G6		miR-10396b-3P	NTC	SYBR	Undetermined			61.3642	0.1
Analysis Type	Singleplex
Endogenous Control	U6
RQ Min/Max Confidence Level	95.0
Reference Sample	Si NC-2
