# Supplementary material for: METTL3-mediated m6A modification of has_circ_0007905 promotes age-related cataract progression through miR-6749-3p/EIF4EBP1
Source: PeerJ journal article supplement (doi:10.7717/peerj.14863), 2023-03-06
Supplement: Raw_data.zip [file Western Blot raw data.xlsx]

## Sheet: 校正
Sample ID	GAPDH	METTL3
siNC	120438	53737
siMETTL3 968	107637	29554
siMETTL3 1086	96998	27176
siMETTL3 1604	103432	43098
siNC	106342	59520
siMETTL3 968	103118	35752
siMETTL3 1086	85931	33935
siMETTL3 1604	113766	37250
siNC	118130	51295
siMETTL3 968	110582	19361
siMETTL3 1086	113963	20953
siMETTL3 1604	99765	19002
Sample ID	METTL3/GAPDH
siNC1	0.44618
siNC2	0.559704
siNC3	0.434225
siMETTL3 968-1	0.274571
siMETTL3 968-2	0.34671
siMETTL3 968-3	0.175083
siMETTL3 1086-1	0.280171
siMETTL3 1086-2	0.39491
siMETTL3 1086-3	0.183858
siMETTL3 1604-1	0.41668
siMETTL3 1604-2	0.327426
siMETTL3 1604-3	0.190468
Sample ID	METTL3/GAPDH	p value
siNC	0.480036
siMETTL3 968	0.265454	0.0282562
siMETTL3 1086	0.286313	0.0566265
siMETTL3 1604	0.311525	0.0937984
