# Supplementary material for: METTL3-mediated m6A modification of has_circ_0007905 promotes age-related cataract progression through miR-6749-3p/EIF4EBP1
Source: PeerJ journal article supplement (doi:10.7717/peerj.14863), 2023-03-06
Supplement: Raw_data.zip [file Western Blot raw data.xlsx]

## Sheet: DATA
Sample ID	GAPDH	EIF4EBP1
NC	99826	44127
OE-EIF4EBP1	92969	79641
NC	94546	34767
OE-EIF4EBP1	95896	88399
NC	85168	28549
OE-EIF4EBP1	110714	78206
Sample ID	EIF4EBP1/GAPDH
NC1	0.442039	1.15821
NC2	0.367726	0.963496
NC3	0.335208	0.878295
OE-EIF4EBP1	0.85664	2.24453
OE-EIF4EBP1	0.921822	2.41531
OE-EIF4EBP1	0.706379	1.85082
Sample ID	EIF4EBP1/GAPDH
NC	0.381658
OE-EIF4EBP1	0.82828
P value	0.00329582
