# Supplementary material for: METTL3-mediated m6A modification of has_circ_0007905 promotes age-related cataract progression through miR-6749-3p/EIF4EBP1
Source: PeerJ journal article supplement (doi:10.7717/peerj.14863), 2023-03-06
Supplement: Raw_data.zip [file Western Blot raw data.xlsx]

## Sheet: data
Sample ID	GAPDH	EIF4EBP1
SiNC	142860	136989
Si circ0007905	148014	94028
Si circ0007905+ EIF4EBP1 OE	151642	102655
SiNC	159189	134866
Si circ0007905	156345	93322
Si circ0007905+ EIF4EBP1 OE	138717	108068
SiNC	156083	139601
Si circ0007905	150583	89967
Si circ0007905+ EIF4EBP1 OE	155143	118231
Sample ID	EIF4EBP1/GAPDH
SiNC1	0.958904	1.06525
SiNC2	0.847207	0.941162
SiNC3	0.894402	0.993592
Si circ0007905-1	0.635264	0.705715
Si circ0007905-2	0.596898	0.663094
Si circ0007905-3	0.597458	0.663716
Si circ0007905+EIF4EBP1 OE-1	0.676956	0.752031
Si circ0007905+EIF4EBP1 OE-2	0.779054	0.865451
Si circ0007905+EIF4EBP1 OE-3	0.762078	0.846592
Sample ID	EIF4EBP1/GAPDH
SiNC	0.900171
Si circ0007905	0.609873
Si circ0007905+EIF4EBP1 OE	0.739363
Tukey's multiple comparisons test	Significant?	Summary	Adjusted P Value
SiNC vs. Si circ0007905	Yes	***	0.0007
SiNC vs. Si circ0007905+EIF4EBP1 OE	Yes	*	0.0135
Si circ0007905 vs. Si circ0007905+EIF4EBP1 OE	Yes	*	0.0344
