# Supplementary material for: METTL3-mediated m6A modification of has_circ_0007905 promotes age-related cataract progression through miR-6749-3p/EIF4EBP1
Source: PeerJ journal article supplement (doi:10.7717/peerj.14863), 2023-03-06
Supplement: Raw_data.zip [file Western Blot raw data.xlsx]

## Sheet: 校正
Sample ID	GAPDH	METTL3
Ctrl	168117	8034.64
UVB	156871	18335.8
Ctrl	180453	10614.1
UVB	169531	20575.6
Ctrl	179863	7372.76
UVB	156617	22846.1
Sample ID	METTL3/GAPDH
Ctrl1	0.047792	0.971365
Ctrl2	0.0588194	1.1955
Ctrl3	0.040991	0.833137
UVB1	0.116884	2.37566
UVB2	0.121368	2.46679
UVB3	0.145872	2.96484
Sample ID	METTL3/GAPDH
Ctrl	0.0492008
UVB	0.128042
P value	0.00162323
