# Supplementary material for: METTL3-mediated m6A modification of has_circ_0007905 promotes age-related cataract progression through miR-6749-3p/EIF4EBP1
Source: PeerJ journal article supplement (doi:10.7717/peerj.14863), 2023-03-06
Supplement: Raw_data.zip [file Western Blot raw data.xlsx]

## Sheet: 校正
Sample ID	GAPDH	EIF4EBP1
SiNC	108661	91131
Si circ0007905	107605	57371
Si circ0007905+miR-6749-3p Inhibitor	118464	74383
SiNC	128762	108529
Si circ0007905	128598	39332
Si circ0007905+miR-6749-3p Inhibitor	109629	72930
SiNC	120619	99489
Si circ0007905	125531	49259
Si circ0007905+miR-6749-3p Inhibitor	117555	80831
Sample ID	EIF4EBP1/GAPDH
SiNC1	0.838673	1.00385
SiNC2	0.842865	1.00887
SiNC3	0.82482	0.987274
Si circ0007905-1	0.533163	0.638173
Si circ0007905-2	0.305852	0.366092
Si circ0007905-3	0.392405	0.469692
Si circ0007905+miR-6749-3p Inhibitor-1	0.627895	0.751563
Si circ0007905+miR-6749-3p Inhibitor-2	0.665244	0.796267
Si circ0007905+miR-6749-3p Inhibitor-3	0.687602	0.823029
Sample ID	EIF4EBP1/GAPDH
SiNC	0.835453
Si circ0007905	0.410473
Si circ0007905+miR-6749-3p Inhibitor	0.660247
Tukey's multiple comparisons test	Significant?	Summary	Adjusted P Value
SiNC vs. Si circ0007905	Yes	***	0.0007
SiNC vs. Si circ0007905+miR-6749-3p Inhibitor	Yes	*	0.0467
Si circ0007905 vs. Si circ0007905+miR-6749-3p Inhibitor	Yes	*	0.0103
